# Supplementary material for: Simulating potential impacts of bottom trawling on the biological carbon pump: a case study in the Benguela Upwelling System
Source: Frontiers journal article supplement (doi:10.3389/fmars.2024.1387121), 2024-11-05
Supplement: Table_1.xlsx [file Table_1.xlsx]

## Sheet: AFR258
Cruise	Station	mm/dd/yyyy	Longitude [degrees_east]	Latitude [degrees_north]	Bot. Depth [m]	Depth [cm]	Total N [%]	Total N [%] / 14.007	Total C [%]	Organic C [%]	Organic C [%] / 12.0107	CaCO3 [%]	C:N ratio
AFR-258	30250	12/06/2009	14.477	-24.447	48	0	1.00641	0.0718505	7.56384	6.89627	0.574177	5.56312	7.99128
AFR-258	30250	12/06/2009	14.477	-24.447	48	1	0.914581	0.0652946	7.31813	6.40347	0.533147	7.62211	8.16526
AFR-258	30250	12/06/2009	14.477	-24.447	48	2	1.04474	0.0745867	7.88142	6.77718	0.564262	9.20203	7.56518
AFR-258	30250	12/06/2009	14.477	-24.447	48	3	1.036	0.073963	8.12	6.4	0.532858	14.3333	7.20439
AFR-258	30250	12/06/2009	14.477	-24.447	48	4	0.950667	0.0678708	7.73868	6.4419	0.536346	10.8066	7.90246
AFR-258	30250	12/06/2009	14.477	-24.447	48	5	0.831626	0.0593722	6.94786	6.00697	0.500135	7.84077	8.42372
AFR-258	30250	12/06/2009	14.477	-24.447	48	6	0.72414	0.0516984	6.2361	5.09402	0.424123	9.51736	8.20379
AFR-258	30250	12/06/2009	14.477	-24.447	48	7	0.728348	0.0519989	6.63835	5.44459	0.453312	9.948	8.71772
AFR-258	30250	12/06/2009	14.477	-24.447	48	8	0.658279	0.0469964	6.02339	5.02428	0.418317	8.32589	8.90105
AFR-258	30250	12/06/2009	14.477	-24.447	48	9	0.754661	0.0538774	6.80004	5.86926	0.488669	7.75652	9.07002
AFR-258	30253	12/08/2009	12.0008	-19.0007	300	0
AFR-258	30253	12/08/2009	12.0008	-19.0007	300	1
AFR-258	30253	12/08/2009	12.0008	-19.0007	300	2
AFR-258	30253	12/08/2009	12.0008	-19.0007	300	3
AFR-258	30253	12/08/2009	12.0008	-19.0007	300	4
AFR-258	30253	12/08/2009	12.0008	-19.0007	300	5
AFR-258	30253	12/08/2009	12.0008	-19.0007	300	6
AFR-258	30253	12/08/2009	12.0008	-19.0007	300	7
AFR-258	30253	12/08/2009	12.0008	-19.0007	300	8
AFR-258	30253	12/08/2009	12.0008	-19.0007	300	9
AFR-258	30253	12/08/2009	12.0008	-19.0007	300	10
AFR-258	30253	12/08/2009	12.0008	-19.0007	300	11
AFR-258	30253	12/08/2009	12.0008	-19.0007	300	12
AFR-258	30253	12/08/2009	12.0008	-19.0007	300	13
AFR-258	30253	12/08/2009	12.0008	-19.0007	300	14
AFR-258	30255	12/09/2009	11.7972	-17.247	56	0	0.575829	0.0411101	4.91401	4.09236	0.340726	6.84712	8.28813
AFR-258	30255	12/09/2009	11.7972	-17.247	56	1	0.568643	0.0405971	4.70541	4.14306	0.344947	4.68631	8.49685
AFR-258	30255	12/09/2009	11.7972	-17.247	56	2	0.456867	0.032617	4.14881	3.73782	0.311207	3.42491	9.54125
AFR-258	30255	12/09/2009	11.7972	-17.247	56	3	0.467198	0.0333546	4.31664	3.80537	0.316831	4.2606	9.49888
AFR-258	30255	12/09/2009	11.7972	-17.247	56	4	0.5101	0.0364175	4.655	3.93832	0.327901	5.97229	9.00394
AFR-258	30255	12/09/2009	11.7972	-17.247	56	5	0.543018	0.0387676	4.47298	4.08322	0.339965	3.24802	8.7693
AFR-258	30255	12/09/2009	11.7972	-17.247	56	6	0.536264	0.0382854	4.54966	4.27662	0.356068	2.27531	9.30034
AFR-258	30255	12/09/2009	11.7972	-17.247	56	7	0.598316	0.0427155	5.07221	4.47983	0.372987	4.93648	8.73189
AFR-258	30255	12/09/2009	11.7972	-17.247	56	8	0.511495	0.0365171	4.45728	4.02192	0.334861	3.62806	9.16997
AFR-258	30255	12/09/2009	11.7972	-17.247	56	9	0.470489	0.0335896	4.44172	3.94472	0.328434	4.1417	9.77784
AFR-258	30255	12/09/2009	11.7972	-17.247	56	10	0.441372	0.0315108	4.15566	3.56152	0.296529	4.95113	9.41039
AFR-258	30255	12/09/2009	11.7972	-17.247	56	11	0.450229	0.0321432	4.20816	3.50838	0.292104	5.83152	9.0876
AFR-258	30255	12/09/2009	11.7972	-17.247	56	12	0.480609	0.0343121	4.40725	3.9561	0.329381	3.7596	9.59957
AFR-258	30255	12/09/2009	11.7972	-17.247	56	13	0.505975	0.036123	4.54458	3.90683	0.325279	5.31461	9.00476
AFR-258	30255	12/09/2009	11.7972	-17.247	56	14	0.579882	0.0413994	4.87173	4.26414	0.355028	5.06322	8.57568
AFR-258	30256	12/09/2009	11.5005	-17.2508	149	0	0.287333	0.0205135	2.54534	2.11138	0.175791	3.61633	8.56954
AFR-258	30256	12/09/2009	11.5005	-17.2508	149	1	0.257973	0.0184175	2.34926	2.1168	0.176243	1.93716	9.56933
AFR-258	30256	12/09/2009	11.5005	-17.2508	149	2	0.266675	0.0190387	2.45605	2.09091	0.174088	3.04277	9.14388
AFR-258	30256	12/09/2009	11.5005	-17.2508	149	3	0.243779	0.0174041	2.23554	1.96585	0.163675	2.24738	9.40441
AFR-258	30256	12/09/2009	11.5005	-17.2508	149	4	0.235633	0.0168225	2.2207	1.828	0.152198	3.27253	9.04725
AFR-258	30256	12/09/2009	11.5005	-17.2508	149	5	0.212941	0.0152025	1.99318	1.591	0.132465	3.35149	8.7134
AFR-258	30256	12/09/2009	11.5005	-17.2508	149	6	0.222544	0.015888	2.15348	1.72907	0.143961	3.5368	9.06094
AFR-258	30256	12/09/2009	11.5005	-17.2508	149	7	0.253694	0.0181119	2.58612	2.01217	0.167532	4.78289	9.2498
AFR-258	30256	12/09/2009	11.5005	-17.2508	149	8	0.284235	0.0202924	2.77397	1.9461	0.162031	6.89886	7.98481
AFR-258	30256	12/09/2009	11.5005	-17.2508	149	9	0.291876	0.0208379	2.84852	2.35072	0.195719	4.14836	9.39245
AFR-258	30263	12/13/2009	13.6828	-23.0013	155	0	0.652304	0.0465699	13.6018	5.07368	0.42243	71.0677	9.07089
AFR-258	30263	12/13/2009	13.6828	-23.0013	155	1	0.796215	0.0568441	14.2686	5.6466	0.470131	71.8502	8.27053
AFR-258	30263	12/13/2009	13.6828	-23.0013	155	2	0.726318	0.0518539	13.9852	5.18908	0.432038	73.301	8.33182
AFR-258	30263	12/13/2009	13.6828	-23.0013	155	3	0.627727	0.0448153	13.5149	6.40271	0.533084	59.2682	11.8952
AFR-258	30263	12/13/2009	13.6828	-23.0013	155	4	0.661023	0.0471924	13.8912	6.18143	0.51466	64.2479	10.9056
AFR-258	30263	12/13/2009	13.6828	-23.0013	155	5	0.668916	0.0477558	13.844	4.91623	0.409321	74.3981	8.57113
AFR-258	30263	12/13/2009	13.6828	-23.0013	155	6	0.663643	0.0473794	13.8223	5.0409	0.419701	73.1782	8.8583
AFR-258	30263	12/13/2009	13.6828	-23.0013	155	7	0.608933	0.0434735	13.5832	5.53288	0.460662	67.0862	10.5964
AFR-258	30263	12/13/2009	13.6828	-23.0013	155	8	0.574964	0.0410484	13.3532	4.21343	0.350806	76.165	8.54617
AFR-258	30263	12/13/2009	13.6828	-23.0013	155	9	0.613048	0.0437672	13.6684	5.33508	0.444194	69.4444	10.149
AFR-258	30263	12/13/2009	13.6828	-23.0013	155	10	0.753032	0.0537611	14.3228	5.12329	0.426561	76.663	7.93438
AFR-258	30265	12/14/2009	14.3297	-23.0008	68	0	1.06857	0.0762885	8.13055	7.4045	0.616492	6.05042	8.08107
AFR-258	30265	12/14/2009	14.3297	-23.0008	68	1	1.13667	0.0811499	8.61842	7.81656	0.6508	6.68212	8.01973
AFR-258	30265	12/14/2009	14.3297	-23.0008	68	2	1.05985	0.0756654	8.18174	7.65639	0.637464	4.37785	8.42477
AFR-258	30265	12/14/2009	14.3297	-23.0008	68	3	0.935696	0.066802	7.30981	6.67149	0.555462	5.31932	8.31505
AFR-258	30265	12/14/2009	14.3297	-23.0008	68	4	0.930055	0.0663993	7.34617	7.06887	0.588548	2.31083	8.86376
AFR-258	30265	12/14/2009	14.3297	-23.0008	68	5	1.10287	0.0787372	8.49342	7.73446	0.643964	6.32464	8.17866
AFR-258	30265	12/14/2009	14.3297	-23.0008	68	6	1.00702	0.071894	7.73176	7.00241	0.583015	6.07789	8.10936
AFR-258	30265	12/14/2009	14.3297	-23.0008	68	7	1.02899	0.0734624	7.9341	7.18626	0.598322	6.23203	8.1446
AFR-258	30265	12/14/2009	14.3297	-23.0008	68	8	0.99689	0.0711708	7.78844	7.058	0.587643	6.08701	8.25679
AFR-258	30265	12/14/2009	14.3297	-23.0008	68	9	1.09784	0.078378	8.46641	7.66865	0.638485	6.64799	8.14623
AFR-258	30265	12/14/2009	14.3297	-23.0008	68	10	1.03093	0.073601	8.02065	7.50468	0.624833	4.29973	8.48946
AFR-258	30265	12/14/2009	14.3297	-23.0008	68	11	0.922155	0.0658353	7.27883	6.70901	0.558586	4.74848	8.48461
AFR-258	30265	12/14/2009	14.3297	-23.0008	68	12	0.871196	0.0621972	7.33226	6.64845	0.553544	5.69845	8.89982
AFR-258	30265	12/14/2009	14.3297	-23.0008	68	13	1.15333	0.0823394	9.0108	7.89	0.656914	9.33997	7.97813
AFR-258	30265	12/14/2009	14.3297	-23.0008	68	14	1.03575	0.0739453	8.06898	7.51768	0.625915	4.59416	8.46457

## Sheet: M48-2
Cruise	Station	Latitude	Longitude	Bottom Depht [m]	Sediment Depth [cm]	TC [%]	TIC [%]	TOC [%]	TOC [%] / 12.0107	TN [%]	TN [%] / 14.007	C:N ratio
M48-2	226620-12	-22.7585	14.3145	81	0.5	4.5869	0.1292	4.4577	0.371144	0.639281	0.0456401	8.13197
M48-2	226630-6	-22.999	14.1497	121	0.5	5.36908	0.2882	5.08088	0.42303	0.714614	0.0510183	8.29172
M48-2	226640-6	-23.2	14.1837	119	0.5	5.85655	0.2761	5.58045	0.464623	0.752491	0.0537225	8.64858
M48-2	226650-2	-25.467	13.0842	1906	0.5	11.3708	7.2744	4.0964	0.341063	0.591506	0.0422293	8.07644
M48-2	226670-5	-23.7717	14.3028	102	0.5	3.65859	0.0986	3.55999	0.296402	0.57024	0.040711	7.28062
M48-2	226680-4	-23.7753	14.2993	111	0.5	3.53033	0.0721	3.45823	0.287929	0.592838	0.0423244	6.80291
M48-2	226690-4	-23.7802	14.2623	116	0.5	4.6545	0.2162	4.4383	0.369529	0.623695	0.0445274	8.29892
M48-2	226720-3	-22.1663	14.0678	69	0.5	3.57804	0.1351	3.44294	0.286656	0.52488	0.0374727	7.64974
M48-2	226730-3	-22.0028	13.8587	91	0.5	6.64527	0.1062	6.53907	0.544437	1.01297	0.0723191	7.52826
M48-2	226740-4	-21.9183	13.8655	78	0.5	5.39434	0.0201	5.37424	0.447454	0.795132	0.0567667	7.88233
M48-2	226760-5	-21.7628	13.7233	94	0.5	8.39927	0.065	8.33427	0.693904	1.16239	0.0829866	8.36165
M48-2	226770-3	-21.3828	13.6667	51	0.5	6.13	0.0236	6.11	0.508713	0.309174	0.0220728	23.047
M48-2	226780-3	-20.9992	13.3665	81	0.5	6.67887	0.2889	6.38997	0.532023	0.976916	0.0697448	7.62814
M48-2	226790-3	-19.7833	12.8667	50	0.5	6.01786	0.1311	5.88676	0.490126	0.908572	0.0648656	7.55603
M48-2	226800-5	-19.8138	12.7727	94	0.5	4.38098	0.0902	4.29078	0.357246	0.681956	0.0486868	7.33764
M48-2	226810-4	-19.8443	12.675	117	0.5	10.25	0.7119	9.5381	0.794134	1.18	0.0842436	9.42663
M48-2	226820-2	-20.1	11.8667	424	0.5	11.9779	8.4089	3.56896	0.297148	0.500567	0.0357369	8.31488
M48-2	226830-3	-21.7333	13.8833	34	0.5	7.6285	0.032	7.5965	0.632478	0.424277	0.0302904	20.8805
M48-2	226850-5	-22.45	14.1167	95	0.5	9.88991	0.3133	9.57661	0.79734	0.938966	0.0670355	11.8943
M48-2	226870-3	-22.668	14	125	0.5	10.1375	0.0928	10.0447	0.836309	1.21717	0.0868974	9.62409
M48-2	226880-5	-19.0666	12.3425	98	0.5	3.69195	0.2446	3.44735	0.287023	0.882311	0.0629908	4.55659
M48-2	226900-1	-19.0167	12.2283	120	0.5	9.5685	6.7051	2.8634	0.238404	0.570083	0.0406999	5.85762
M48-2	226920-1	-22.4483	12.3583	1681	0.5	7.72	0.078	7.642	0.636266	0.337003	0.0240596	26.4454

## Sheet: M76-2
Cruise	Station	Date	Latitude	Longitude	Bot. depth [m]	Sample depth [cm]	TN [%]	TN [%] / 14.007	TC [%]	Corg [%]	Corg [%] / 12.0107	C:N ratio
M76-2	203	05/18/2008	-22.999	13.499	233.5	0.5	0.604135	0.0431309	12.7519	5.14	0.427952	9.92215
M76-2	203	05/18/2008	-22.999	13.499	233.5	1.5	0.652973	0.0466176	13.202	5.53	0.460423	9.87659
M76-2	203	05/18/2008	-22.999	13.499	233.5	2.5	0.68343	0.048792	13.2661	5.63	0.468749	9.60707
M76-2	203	05/18/2008	-22.999	13.499	233.5	3.5	0.673111	0.0480553	12.9515	5.68	0.472912	9.84098
M76-2	203	05/18/2008	-22.999	13.499	233.5	4.5	0.656921	0.0468995	12.9049	6.03	0.502052	10.7049
M76-2	203	05/18/2008	-22.999	13.499	233.5	5.5	0.667575	0.0476601	13.0034	5.58	0.464586	9.7479
M76-2	206	05/18/2008	-23.003	14.0492	130.6	0.5	0.829054	0.0591885	5.52517	4.77026	0.397168	6.71021
M76-2	206	05/18/2008	-23.003	14.0492	130.6	1.5	0.956947	0.0683192	6.87174	6.11618	0.509227	7.45365
M76-2	206	05/18/2008	-23.003	14.0492	130.6	2.5	0.952059	0.0679702	6.80253	5.91765	0.492698	7.24874
M76-2	206	05/18/2008	-23.003	14.0492	130.6	3.5	0.965927	0.0689603	6.84233	6.02663	0.501772	7.27624
M76-2	206	05/18/2008	-23.003	14.0492	130.6	4.5	0.979022	0.0698952	6.81863	5.97938	0.497838	7.12263
M76-2	206	05/18/2008	-23.003	14.0492	130.6	5.5	0.958343	0.0684189	6.87345	6.10642	0.508415	7.43092
M76-2	206	05/18/2008	-23.003	14.0492	130.6	6.5	1.00514	0.07176	7.29014	6.34502	0.52828	7.36177
M76-2	206	05/18/2008	-23.003	14.0492	130.6	7.5	1.10885	0.0791643	8.18037	7.17141	0.597085	7.54236
M76-2	206	05/18/2008	-23.003	14.0492	130.6	8.5	1.03161	0.0736497	7.62181	6.77009	0.563672	7.65341
M76-2	206	05/18/2008	-23.003	14.0492	130.6	9.5	1.085	0.0774613	8.1285	7.157	0.595885	7.69269
M76-2	206	05/18/2008	-23.003	14.0492	130.6	10.5	1.15122	0.0821891	8.66797	7.67048	0.638637	7.77034
M76-2	206	05/18/2008	-23.003	14.0492	130.6	11.5	1.14295	0.0815982	8.75012	7.76614	0.646602	7.92422
M76-2	206	05/18/2008	-23.003	14.0492	130.6	12.5	1.1668	0.0833011	9.09972	7.99014	0.665252	7.98611
M76-2	206	05/18/2008	-23.003	14.0492	130.6	13.5	1.17995	0.0842404	9.26089	8.24388	0.686378	8.14785
M76-2	206	05/18/2008	-23.003	14.0492	130.6	14.5	1.16918	0.0834708	9.09662	8.10725	0.675002	8.08669
M76-2	206	05/18/2008	-23.003	14.0492	130.6	15.5	1.14861	0.0820026	9.04613	8.03415	0.668916	8.15726
M76-2	206	05/18/2008	-23.003	14.0492	130.6	16.5	1.16457	0.0831421	9.25829	8.16579	0.679876	8.17728
M76-2	206	05/18/2008	-23.003	14.0492	130.6	17.5	1.14714	0.0818974	9.57218	8.23906	0.685977	8.37605
M76-2	206	05/18/2008	-23.003	14.0492	130.6	18.5	1.05962	0.0756495	9.04039	7.701	0.641178	8.47564
M76-2	206	05/18/2008	-23.003	14.0492	130.6	19.5	0.983751	0.0702328	8.49351	7.24043	0.602832	8.58334
M76-2	206	05/18/2008	-23.003	14.0492	130.6	20.5	0.938604	0.0670096	8.22683	7.41569	0.617423	9.21395
M76-2	206	05/18/2008	-23.003	14.0492	130.6	21.5	0.929219	0.0663397	8.11868	7.26696	0.60504	9.12034
M76-2	206	05/18/2008	-23.003	14.0492	130.6	22.5	0.980387	0.0699926	8.34056	7.59449	0.632311	9.03396
M76-2	206	05/18/2008	-23.003	14.0492	130.6	23.5	0.987099	0.0704718	8.41654	7.66175	0.63791	9.05199
M76-2	206	05/18/2008	-23.003	14.0492	130.6	24.5	0.998435	0.0712811	8.38214	7.78421	0.648106	9.09226
M76-2	206	05/18/2008	-23.003	14.0492	130.6	25.5	1.0319	0.0736703	8.50142	8.02094	0.667816	9.06493
M76-2	206	05/18/2008	-23.003	14.0492	130.6	26.5	1.02188	0.0729547	8.46064	7.94821	0.661761	9.07084
M76-2	206	05/18/2008	-23.003	14.0492	130.6	27.5	1.00111	0.0714719	8.40789	7.71086	0.641999	8.98254
M76-2	206	05/18/2008	-23.003	14.0492	130.6	28.5	0.962854	0.0687409	8.28848	7.47661	0.622496	9.05568
M76-2	206	05/18/2008	-23.003	14.0492	130.6	29.5	0.992	0.0708217	8.338	7.726	0.64326	9.0828
M76-2	206	05/18/2008	-23.003	14.0492	130.6	30.5	1.02345	0.0730671	8.65726	7.94978	0.661891	9.05868
M76-2	206	05/18/2008	-23.003	14.0492	130.6	31.5	0.963437	0.0687825	8.04848	7.42605	0.618286	8.989
M76-2	206	05/18/2008	-23.003	14.0492	130.6	32.5	0.937589	0.0669372	7.88906	7.43779	0.619264	9.25142
M76-2	206	05/18/2008	-23.003	14.0492	130.6	33.5	0.963665	0.0687988	8.0388	7.4843	0.623136	9.05737
M76-2	206	05/18/2008	-23.003	14.0492	130.6	34.5	0.966059	0.0689697	8.10432	7.60952	0.633561	9.18608
M76-2	206	05/18/2008	-23.003	14.0492	130.6	35.5	0.899171	0.0641944	7.66632	7.14205	0.594641	9.26312
M76-2	206	05/18/2008	-23.003	14.0492	130.6	36.5	0.912825	0.0651692	7.729	7.14276	0.5947	9.12547
M76-2	206	05/18/2008	-23.003	14.0492	130.6	37.5	0.866166	0.0618381	7.47576	6.76008	0.562838	9.1018
M76-2	206	05/18/2008	-23.003	14.0492	130.6	38.5	0.83703	0.0597579	7.19687	6.513	0.542266	9.07438
M76-2	206	05/18/2008	-23.003	14.0492	130.6	39.5	0.797625	0.0569447	6.75307	6.13329	0.510652	8.9675
M76-2	205	05/18/2008	-23.001	13.866	144.7	0.5	1.55895	0.111298	14.9428	12.1211	1.00919	9.06746
M76-2	205	05/18/2008	-23.001	13.866	144.7	1.5	1.63414	0.116666	15.4322	12.4085	1.03312	8.85535
M76-2	205	05/18/2008	-23.001	13.866	144.7	2.5	1.63213	0.116522	15.9053	12.7724	1.06342	9.12628
M76-2	205	05/18/2008	-23.001	13.866	144.7	3.5	1.6576	0.118341	16.0123	13.198	1.09885	9.28551
M76-2	205	05/18/2008	-23.001	13.866	144.7	4.5	1.66874	0.119136	16.0083	13.0192	1.08397	9.09856
M76-2	205	05/18/2008	-23.001	13.866	144.7	5.5	1.6736	0.119483	15.9697	13.0867	1.08959	9.11917
M76-2	205	05/18/2008	-23.001	13.866	144.7	6.5	1.65558	0.118197	15.9293	12.7651	1.06281	8.99184
M76-2	205	05/18/2008	-23.001	13.866	144.7	7.5	1.62065	0.115703	15.8147	12.9069	1.07461	9.28768
M76-2	205	05/18/2008	-23.001	13.866	144.7	8.5	1.62163	0.115773	15.9006	12.8963	1.07373	9.27447
M76-2	205	05/18/2008	-23.001	13.866	144.7	9.5	1.623	0.115871	16.118	12.8445	1.06942	9.22944
M76-2	205	05/18/2008	-23.001	13.866	144.7	10.5	1.62311	0.115878	16.2249	12.9257	1.07618	9.28714
M76-2	205	05/18/2008	-23.001	13.866	144.7	11.5	1.62941	0.116328	16.44	13.2503	1.10321	9.48356
M76-2	205	05/18/2008	-23.001	13.866	144.7	12.5	1.61138	0.115041	16.3414	12.9633	1.07931	9.38198
M76-2	205	05/18/2008	-23.001	13.866	144.7	13.5	1.62986	0.116361	16.6375	13.3375	1.11047	9.54334
M76-2	205	05/18/2008	-23.001	13.866	144.7	14.5	1.58412	0.113095	16.563	13.1599	1.09568	9.68815
M76-2	205	05/18/2008	-23.001	13.866	144.7	15.5	1.51708	0.108309	16.2181	12.6863	1.05625	9.75222
M76-2	205	05/18/2008	-23.001	13.866	144.7	16.5	1.47427	0.105253	16.3957	12.4755	1.0387	9.86862
M76-2	205	05/18/2008	-23.001	13.866	144.7	17.5	1.53535	0.109613	16.8062	12.8037	1.06602	9.72531
M76-2	205	05/18/2008	-23.001	13.866	144.7	18.5	1.55065	0.110706	16.8908	12.9226	1.07592	9.71878
M76-2	205	05/18/2008	-23.001	13.866	144.7	19.5	1.64253	0.117265	18.0012	12.86	1.07071	9.13073
M76-2	205	05/18/2008	-23.001	13.866	144.7	20.5	1.61757	0.115483	17.5481	12.79	1.06488	9.22114
M76-2	205	05/18/2008	-23.001	13.866	144.7	21.5	1.60434	0.114539	17.3052	12.75	1.06155	9.26809
M76-2	205	05/18/2008	-23.001	13.866	144.7	22.5	1.60576	0.11464	17.3352	12.73	1.05989	9.24539
M76-2	205	05/18/2008	-23.001	13.866	144.7	23.5	1.59896	0.114154	17.3972	12.7	1.05739	9.26281
M76-2	205	05/18/2008	-23.001	13.866	144.7	24.5	1.63739	0.116898	17.5566	13.05	1.08653	9.29471
M76-2	205	05/18/2008	-23.001	13.866	144.7	25.5	1.55581	0.111074	17.2268	12.66	1.05406	9.48972
M76-2	205	05/18/2008	-23.001	13.866	144.7	26.5	1.52994	0.109227	17.3699	12.31	1.02492	9.38342
M76-2	205	05/18/2008	-23.001	13.866	144.7	27.5	1.44498	0.103161	16.9488	11.86	0.987453	9.57192
M76-2	205	05/18/2008	-23.001	13.866	144.7	28.5	1.41794	0.101231	16.957	11.71	0.974964	9.63112
M76-2	205	05/18/2008	-23.001	13.866	144.7	29.5	1.3525	0.0965589	16.567	11.19	0.931669	9.64872
M76-2	205	05/18/2008	-23.001	13.866	144.7	30.5	1.41861	0.101279	17.1304	11.65	0.969968	9.57724
M76-2	205	05/18/2008	-23.001	13.866	144.7	31.5	1.45747	0.104053	17.3645	12.15	1.0116	9.72193
M76-2	205	05/18/2008	-23.001	13.866	144.7	32.5	1.47178	0.105075	17.4224	11.95	0.994946	9.46892
M76-2	205	05/18/2008	-23.001	13.866	144.7	33.5	1.49725	0.106893	17.54	11.92	0.992448	9.28451
M76-2	205	05/18/2008	-23.001	13.866	144.7	34.5	1.47673	0.105428	17.4255	12.27	1.02159	9.6899
M76-2	205	05/18/2008	-23.001	13.866	144.7	35.5	1.43536	0.102475	17.429	11.84	0.985788	9.61983
M76-2	205	05/18/2008	-23.001	13.866	144.7	36.5	1.4423	0.10297	17.4378	12.23	1.01826	9.88892
M76-2	205	05/18/2008	-23.001	13.866	144.7	37.5	1.94752	0.139039	23.3447	11.42	0.950819	6.83851
M76-2	205	05/18/2008	-23.001	13.866	144.7	38.5	1.48176	0.105787	17.8931	12.4	1.03241	9.75932
M76-2	205	05/18/2008	-23.001	13.866	144.7	39.5	1.4725	0.105126	17.77	12.2	1.01576	9.66232
M76-2	207	05/19/2008	-22.1667	14.0833	63.8	0.5	0.863638	0.0616576	6.46923	6.47035	0.538715	8.73721
M76-2	207	05/19/2008	-22.1667	14.0833	63.8	1.5	0.718657	0.051307	5.4523	5.45522	0.454197	8.85253
M76-2	207	05/19/2008	-22.1667	14.0833	63.8	2.5	0.944298	0.0674162	6.86294	6.85752	0.570951	8.46905
M76-2	207	05/19/2008	-22.1667	14.0833	63.8	3.5	1.22622	0.0875432	8.99192	7.21277	0.600528	6.8598
M76-2	207	05/19/2008	-22.1667	14.0833	63.8	4.5	0.965558	0.068934	7.11407	7.09969	0.591114	8.57507
M76-2	207	05/19/2008	-22.1667	14.0833	63.8	5.5	1.25423	0.0895432	8.99349	8.99325	0.74877	8.36211
M76-2	207	05/19/2008	-22.1667	14.0833	63.8	6.5	1.17386	0.0838053	8.7288	8.65415	0.720537	8.59774
M76-2	207	05/19/2008	-22.1667	14.0833	63.8	7.5	0.837362	0.0597817	6.18096	6.17619	0.514224	8.60169
M76-2	207	05/19/2008	-22.1667	14.0833	63.8	8.5	0.561836	0.0401111	4.22787	4.23027	0.352209	8.78082
M76-2	207	05/19/2008	-22.1667	14.0833	63.8	9.5	0.457337	0.0326506	3.54482	3.54089	0.294811	9.02928
M76-2	207	05/19/2008	-22.1667	14.0833	63.8	10.5	0.435897	0.03112	3.56391	3.50838	0.292105	9.38641
M76-2	207	05/19/2008	-22.1667	14.0833	63.8	11.5	0.510466	0.0364436	4.01806	3.98383	0.33169	9.10146
M76-2	207	05/19/2008	-22.1667	14.0833	63.8	12.5	0.48806	0.034844	3.97518	3.92643	0.326911	9.38214
M76-2	207	05/19/2008	-22.1667	14.0833	63.8	13.5	0.480545	0.0343075	3.88734	3.77411	0.314229	9.1592
M76-2	207	05/19/2008	-22.1667	14.0833	63.8	14.5	0.498447	0.0355856	4.10367	3.93337	0.327489	9.20286
M76-2	207	05/19/2008	-22.1667	14.0833	63.8	15.5	0.533126	0.0380614	4.57124	4.57875	0.381222	10.016
M76-2	207	05/19/2008	-22.1667	14.0833	63.8	16.5	0.553887	0.0395436	4.75351	4.74688	0.395221	9.99455
M76-2	207	05/19/2008	-22.1667	14.0833	63.8	17.5	0.519711	0.0371036	4.39834	4.26119	0.354783	9.56194
M76-2	207	05/19/2008	-22.1667	14.0833	63.8	18.5	0.634014	0.0452641	5.519	5.50815	0.458604	10.1317
M76-2	207	05/19/2008	-22.1667	14.0833	63.8	19.5	0.590036	0.0421244	5.53948	5.54461	0.461639	10.959
M76-2	207	05/19/2008	-22.1667	14.0833	63.8	20.5	0.604221	0.0431371	5.25965	5.26388	0.438266	10.1598
M76-2	207	05/19/2008	-22.1667	14.0833	63.8	21.5	0.584483	0.041728	4.98009	4.8635	0.404931	9.70406
M76-2	225	05/24/2008	-19.0198	12.2307	119	0.5	0.460654	0.0328874	3.16894	3.14834	0.262128	7.97047
M76-2	225	05/24/2008	-19.0198	12.2307	119	1.5	0.446629	0.0318861	3.04329	3.26635	0.271953	8.52889
M76-2	225	05/24/2008	-19.0198	12.2307	119	2.5	0.502215	0.0358546	3.42947	2.91229	0.242474	6.76271
M76-2	225	05/24/2008	-19.0198	12.2307	119	3.5	0.350102	0.0249948	2.72264	2.58728	0.215415	8.61838
M76-2	225	05/24/2008	-19.0198	12.2307	119	4.5	0.444141	0.0317085	3.0445	2.73129	0.227405	7.17172
M76-2	225	05/24/2008	-19.0198	12.2307	119	5.5	0.520814	0.0371824	3.60314	3.65933	0.304673	8.19399
M76-2	225	05/24/2008	-19.0198	12.2307	119	6.5	0.510684	0.0364592	3.38972	3.23261	0.269144	7.38206
M76-2	225	05/24/2008	-19.0198	12.2307	119	7.5	0.365422	0.0260885	2.94735	2.62687	0.218711	8.38342
M76-2	225	05/24/2008	-19.0198	12.2307	119	8.5	0.462456	0.0330161	3.0317	2.94493	0.245193	7.42647
M76-2	225	05/24/2008	-19.0198	12.2307	119	9.5	0.346917	0.0247674	2.2876	2.0575	0.171306	6.91658
M76-2	225	05/24/2008	-19.0198	12.2307	119	10.5	0.260304	0.0185839	1.42479	1.47128	0.122498	6.59161
M76-2	225	05/24/2008	-19.0198	12.2307	119	11.5	0.206508	0.0147432	1.23355	1.25785	0.104728	7.10347
M76-2	225	05/24/2008	-19.0198	12.2307	119	13.5	0.204784	0.0146201	1.08463	0.993103	0.0826848	5.65556
M76-2	225	05/24/2008	-19.0198	12.2307	119	14.5	0.168492	0.0120291	1.01087	0.938147	0.0781093	6.49334
M76-2	225	05/24/2008	-19.0198	12.2307	119	15.5	0.190333	0.0135884	1.05416	0.985533	0.0820546	6.03857
M76-2	225	05/24/2008	-19.0198	12.2307	119	16.5	0.246861	0.0176241	1.04443	1.03566	0.0862284	4.89263
M76-2	225	05/24/2008	-19.0198	12.2307	119	17.5	0.25519	0.0182187	1.05183	0.990641	0.0824799	4.5272
M76-2	225	05/24/2008	-19.0198	12.2307	119	18.5	0.225345	0.0160881	1.06361	1.0175	0.0847161	5.26578
M76-2	225	05/24/2008	-19.0198	12.2307	119	19.5	0.235753	0.0168311	1.04461	0.982723	0.0818206	4.86129
M76-2	225	05/24/2008	-19.0198	12.2307	119	20.5	0.282657	0.0201797	1.1318	1.1338	0.0943988	4.67791
M76-2	225	05/24/2008	-19.0198	12.2307	119	21.5	0.197483	0.0140989	1.125	1.03684	0.0863264	6.12292
M76-2	225	05/24/2008	-19.0198	12.2307	119	22.5	0.274656	0.0196085	1.16287	1.14415	0.095261	4.85816
M76-2	225	05/24/2008	-19.0198	12.2307	119	23.5	0.260482	0.0185966	1.16202	1.06355	0.0885499	4.76162
M76-2	225	05/24/2008	-19.0198	12.2307	119	24.5	0.243507	0.0173847	1.1218	1.04006	0.0865948	4.9811
M76-2	225	05/24/2008	-19.0198	12.2307	119	25.5	0.214349	0.015303	1.07006	1.08566	0.0903911	5.90675
M76-2	225	05/24/2008	-19.0198	12.2307	119	26.5	0.278867	0.0199091	1.10119	1.07633	0.0896145	4.50118
M76-2	225	05/24/2008	-19.0198	12.2307	119	27.5	0.278047	0.0198506	1.04653	1.0165	0.0846329	4.26349
M76-2	225	05/24/2008	-19.0198	12.2307	119	28.5	0.266093	0.0189971	1.11291	1.0392	0.086523	4.55453
M76-2	225	05/24/2008	-19.0198	12.2307	119	29.5	0.236845	0.016909	1.05578	0.962457	0.0801333	4.73908
M76-2	230	05/26/2008	-19.8138	12.7728	99.8	0.5	0.740126	0.0528397	5.83999	5.46286	0.454833	8.60778
M76-2	230	05/26/2008	-19.8138	12.7728	99.8	1.5	0.892455	0.0637149	7.0969	6.44646	0.536726	8.42387
M76-2	230	05/26/2008	-19.8138	12.7728	99.8	2.5	0.930706	0.0664458	7.58971	6.8104	0.567027	8.53369
M76-2	230	05/26/2008	-19.8138	12.7728	99.8	3.5	0.812817	0.0580293	6.59204	5.87843	0.489432	8.43423
M76-2	230	05/26/2008	-19.8138	12.7728	99.8	4.5	0.747722	0.053382	6.07177	5.35566	0.445907	8.35313
M76-2	230	05/26/2008	-19.8138	12.7728	99.8	5.5	0.761804	0.0543874	6.28446	5.48713	0.456854	8.39999
M76-2	230	05/26/2008	-19.8138	12.7728	99.8	6.5	0.729193	0.0520592	6.0771	5.3014	0.44139	8.47863
M76-2	230	05/26/2008	-19.8138	12.7728	99.8	7.5	0.764707	0.0545946	6.47241	5.76375	0.479885	8.78997
M76-2	230	05/26/2008	-19.8138	12.7728	99.8	8.5	0.820138	0.058552	6.93843	6.18903	0.515293	8.80061
M76-2	230	05/26/2008	-19.8138	12.7728	99.8	9.5	0.8604	0.0614264	7.423	6.67498	0.555753	9.04745
M76-2	230	05/26/2008	-19.8138	12.7728	99.8	10.5	0.888924	0.0634628	7.67312	6.90497	0.574902	9.05887
M76-2	230	05/26/2008	-19.8138	12.7728	99.8	11.5	0.887819	0.063384	7.54969	6.88275	0.573052	9.04096
M76-2	230	05/26/2008	-19.8138	12.7728	99.8	12.5	0.896677	0.0640164	7.59473	6.79766	0.565967	8.84097
M76-2	230	05/26/2008	-19.8138	12.7728	99.8	13.5	0.904584	0.0645809	7.80525	7.16683	0.596704	9.23964
M76-2	230	05/26/2008	-19.8138	12.7728	99.8	14.5	0.983056	0.0701832	8.58356	7.8583	0.654275	9.32239
M76-2	230	05/26/2008	-19.8138	12.7728	99.8	15.5	1.06197	0.0758172	9.48446	8.7169	0.725761	9.57252
M76-2	230	05/26/2008	-19.8138	12.7728	99.8	16.5	1.11244	0.0794202	9.97602	9.14153	0.761115	9.58339
M76-2	230	05/26/2008	-19.8138	12.7728	99.8	17.5	1.13173	0.0807978	10.1433	9.33826	0.777495	9.62273
M76-2	230	05/26/2008	-19.8138	12.7728	99.8	18.5	1.11552	0.0796401	10.0466	9.2061	0.766492	9.62444
M76-2	230	05/26/2008	-19.8138	12.7728	99.8	19.5	1.14555	0.0817839	10.3655	9.52523	0.793062	9.69705
M76-2	230	05/26/2008	-19.8138	12.7728	99.8	20.5	1.139	0.0813165	10.543	9.4388	0.785866	9.66429
M76-2	230	05/26/2008	-19.8138	12.7728	99.8	21.5	1.104	0.0788177	10.43	9.27677	0.772376	9.79952
M76-2	230	05/26/2008	-19.8138	12.7728	99.8	22.5	1.098	0.0783894	10.419	9.34386	0.777961	9.92432
M76-2	230	05/26/2008	-19.8138	12.7728	99.8	23.5	1.07	0.0763904	10.132	9.04784	0.753315	9.86139
M76-2	230	05/26/2008	-19.8138	12.7728	99.8	24.5	1.04	0.0742486	9.9	8.79059	0.731897	9.85738
M76-2	230	05/26/2008	-19.8138	12.7728	99.8	25.5	1.008	0.071964	9.528	8.58078	0.714428	9.92757
M76-2	230	05/26/2008	-19.8138	12.7728	99.8	26.5	0.995	0.0710359	9.406	8.57993	0.714357	10.0563
M76-2	230	05/26/2008	-19.8138	12.7728	99.8	27.5	0.952	0.067966	9.064	8.12358	0.676362	9.95148
M76-2	230	05/26/2008	-19.8138	12.7728	99.8	28.5	0.958	0.0683944	8.998	8.10341	0.674682	9.86459
M76-2	230	05/26/2008	-19.8138	12.7728	99.8	29.5	1.048	0.0748197	10.052	9.04349	0.752953	10.0636
M76-2	230	05/26/2008	-19.8138	12.7728	99.8	30.5	1.12	0.07996	10.729	9.53866	0.79418	9.93221
M76-2	230	05/26/2008	-19.8138	12.7728	99.8	31.5	1.11	0.0792461	10.689	9.58286	0.797861	10.0681
M76-2	230	05/26/2008	-19.8138	12.7728	99.8	32.5	1.103	0.0787463	10.593	9.71239	0.808645	10.269
M76-2	230	05/26/2008	-19.8138	12.7728	99.8	33.5	1.093	0.0780324	10.594	9.27364	0.772115	9.8948
M76-2	230	05/26/2008	-19.8138	12.7728	99.8	34.5	1.072	0.0765332	10.45	9.14634	0.761516	9.95014
M76-2	230	05/26/2008	-19.8138	12.7728	99.8	35.5	1.06	0.0756764	10.396	8.99639	0.749031	9.89781
M76-2	230	05/26/2008	-19.8138	12.7728	99.8	36.5	1.001	0.0714643	9.759	8.43393	0.702201	9.82591
M76-2	230	05/26/2008	-19.8138	12.7728	99.8	37.5	0.994	0.0709645	9.657	8.38087	0.697783	9.83285
M76-2	230	05/26/2008	-19.8138	12.7728	99.8	38.5	1.027	0.0733205	9.866	8.57609	0.714037	9.73858
M76-2	230	05/26/2008	-19.8138	12.7728	99.8	39.5	1.029	0.0734633	9.772	8.643	0.719608	9.79549
M76-2	231	05/27/2008	-21.0078	13.2533	122.9	0.5	1.3911	0.0993147	11.9453	10.6965	0.890584	8.9673
M76-2	231	05/27/2008	-21.0078	13.2533	122.9	1.5	1.41415	0.10096	12.4312	11.138	0.927339	9.18518
M76-2	231	05/27/2008	-21.0078	13.2533	122.9	2.5	1.39195	0.0993751	12.2744	10.992	0.915186	9.20941
M76-2	231	05/27/2008	-21.0078	13.2533	122.9	3.5	1.43827	0.102682	12.8842	11.3806	0.947538	9.22789
M76-2	231	05/27/2008	-21.0078	13.2533	122.9	4.5	1.3407	0.0957161	12.263	10.7739	0.897022	9.3717
M76-2	231	05/27/2008	-21.0078	13.2533	122.9	5.5	1.30506	0.093172	12.191	10.7293	0.893315	9.58781
M76-2	231	05/27/2008	-21.0078	13.2533	122.9	6.5	1.39112	0.0993158	13.061	11.1114	0.925125	9.31499
M76-2	231	05/27/2008	-21.0078	13.2533	122.9	7.5	1.37298	0.0980213	12.8732	11.286	0.939664	9.58633
M76-2	231	05/27/2008	-21.0078	13.2533	122.9	8.5	1.36538	0.0974784	12.9232	11.2654	0.937946	9.62209
M76-2	231	05/27/2008	-21.0078	13.2533	122.9	9.5	1.34992	0.0963748	12.9232	11.2295	0.934958	9.70127
M76-2	231	05/27/2008	-21.0078	13.2533	122.9	10.5	1.39951	0.099915	13.7072	11.8721	0.988461	9.89302
M76-2	231	05/27/2008	-21.0078	13.2533	122.9	11.5	1.4045	0.100271	13.9032	11.9141	0.991958	9.89278
M76-2	231	05/27/2008	-21.0078	13.2533	122.9	12.5	1.40088	0.100013	13.9688	12.072	1.0051	10.0497
M76-2	231	05/27/2008	-21.0078	13.2533	122.9	13.5	1.42023	0.101394	14.0034	12.1808	1.01416	10.0021
M76-2	231	05/27/2008	-21.0078	13.2533	122.9	14.5	1.37268	0.0979993	13.59	11.852	0.986788	10.0693
M76-2	231	05/27/2008	-21.0078	13.2533	122.9	15.5	1.32499	0.0945951	13.0666	11.3903	0.948349	10.0254
M76-2	231	05/27/2008	-21.0078	13.2533	122.9	16.5	1.35643	0.0968397	13.3862	11.4733	0.955253	9.86427
M76-2	231	05/27/2008	-21.0078	13.2533	122.9	17.5	1.34291	0.0958742	13.3133	11.4873	0.956422	9.9758
M76-2	231	05/27/2008	-21.0078	13.2533	122.9	18.5	1.29294	0.092307	12.9698	10.9239	0.909511	9.85311
M76-2	231	05/27/2008	-21.0078	13.2533	122.9	19.5	1.23887	0.0884467	12.4333	10.6804	0.889243	10.054
M76-2	231	05/27/2008	-21.0078	13.2533	122.9	20.5	1.2267	0.0875778	12.3507	10.2566	0.853955	9.75081
M76-2	231	05/27/2008	-21.0078	13.2533	122.9	21.5	1.14791	0.0819529	11.5745	9.6906	0.806831	9.84505
M76-2	231	05/27/2008	-21.0078	13.2533	122.9	22.5	1.03241	0.0737065	10.2147	8.60538	0.716476	9.72066
M76-2	231	05/27/2008	-21.0078	13.2533	122.9	23.5	0.893737	0.0638065	8.89649	7.62373	0.634745	9.94796
M76-2	231	05/27/2008	-21.0078	13.2533	122.9	24.5	0.770543	0.0550113	7.71946	6.57362	0.547314	9.94913
M76-2	231	05/27/2008	-21.0078	13.2533	122.9	25.5	0.522406	0.0372961	5.41331	4.58542	0.381778	10.2364
M76-2	231	05/27/2008	-21.0078	13.2533	122.9	26.5	0.957741	0.0683759	9.91147	7.92821	0.660095	9.65392
M76-2	231	05/27/2008	-21.0078	13.2533	122.9	27.5	1.33089	0.0950159	13.6	11.0692	0.921612	9.69955
M76-2	231	05/27/2008	-21.0078	13.2533	122.9	28.5	1.34238	0.0958364	13.5998	11.3116	0.941795	9.82711
M76-2	231	05/27/2008	-21.0078	13.2533	122.9	29.5	1.34506	0.0960278	13.7821	11.3611	0.945915	9.85043
M76-2	231	05/27/2008	-21.0078	13.2533	122.9	30.5	1.3589	0.0970157	13.8799	11.4371	0.952244	9.81536
M76-2	231	05/27/2008	-21.0078	13.2533	122.9	31.5	1.04438	0.0745611	10.7153	8.846	0.73651	9.87793
M76-2	231	05/27/2008	-21.0078	13.2533	122.9	32.5	0.538398	0.0384378	5.56214	4.62783	0.385309	10.0242
M76-2	231	05/27/2008	-21.0078	13.2533	122.9	33.5	1.05669	0.0754398	10.2659	8.15868	0.679285	9.00432
M76-2	231	05/27/2008	-21.0078	13.2533	122.9	34.5	1.04745	0.0747808	10.335	9.02619	0.751512	10.0495
M76-2	231	05/27/2008	-21.0078	13.2533	122.9	35.5	0.702573	0.0501587	6.95239	5.99625	0.499242	9.95324
M76-2	231	05/27/2008	-21.0078	13.2533	122.9	36.5	0.332735	0.0237549	3.54379	2.85812	0.237965	10.0175
M76-2	231	05/27/2008	-21.0078	13.2533	122.9	37.5	0.212104	0.0151427	2.49178	1.83031	0.15239	10.0636
M76-2	231	05/27/2008	-21.0078	13.2533	122.9	38.5	0.204084	0.0145702	2.44076	1.7184	0.143072	9.81956
M76-2	231	05/27/2008	-21.0078	13.2533	122.9	39.5	0.2168	0.015478	2.67031	2.01111	0.167443	10.8181
M76-2	231	05/27/2008	-21.0078	13.2533	122.9	40.5	0.215125	0.0153584	2.49531	1.81598	0.151197	9.84456
M76-2	231	05/27/2008	-21.0078	13.2533	122.9	41.5	0.423838	0.030259	4.44003	3.62006	0.301403	9.96077
M76-2	243	05/30/2008	-22.0957	13.8615	103	0.5	1.19528	0.0853345	9.3279	8.382	0.697878	8.17815
M76-2	243	05/30/2008	-22.0957	13.8615	103	1.5	1.5247	0.108853	11.2425	10.166	0.846412	7.77577
M76-2	243	05/30/2008	-22.0957	13.8615	103	2.5	1.65852	0.118406	12.4128	11.305	0.941244	7.94928
M76-2	243	05/30/2008	-22.0957	13.8615	103	3.5	1.68021	0.119955	12.639	11.577	0.963891	8.03543
M76-2	243	05/30/2008	-22.0957	13.8615	103	4.5	1.56098	0.111443	12.0244	10.882	0.906025	8.12997
M76-2	243	05/30/2008	-22.0957	13.8615	103	5.5	1.4059	0.100371	11.0736	10.154	0.845413	8.42289
M76-2	243	05/30/2008	-22.0957	13.8615	103	6.5	1.4625	0.104412	11.5669	10.441	0.869308	8.32572
M76-2	243	05/30/2008	-22.0957	13.8615	103	7.5	1.59866	0.114133	12.6993	11.503	0.957729	8.39137
M76-2	243	05/30/2008	-22.0957	13.8615	103	8.5	1.05014	0.0749722	8.90464	8.095	0.673982	8.98977
M76-2	243	05/30/2008	-22.0957	13.8615	103	9.5	1.424	0.101663	11.712	10.089	0.840001	8.26257
M76-2	243	05/30/2008	-22.0957	13.8615	103	10.5	0.946702	0.0675877	8.29069	7.756	0.645758	9.55436
M76-2	243	05/30/2008	-22.0957	13.8615	103	11.5	0.817934	0.0583947	7.54868	7.165	0.596551	10.2159
M76-2	243	05/30/2008	-22.0957	13.8615	103	12.5	0.82528	0.0589191	7.62593	7.224	0.601464	10.2083
M76-2	243	05/30/2008	-22.0957	13.8615	103	13.5	0.843156	0.0601953	7.88849	7.562	0.629605	10.4594
M76-2	243	05/30/2008	-22.0957	13.8615	103	14.5	0.886833	0.0633135	8.24667	7.863	0.654666	10.3401
M76-2	243	05/30/2008	-22.0957	13.8615	103	15.5	0.891713	0.063662	8.22241	7.858	0.65425	10.2769
M76-2	243	05/30/2008	-22.0957	13.8615	103	16.5	0.816764	0.0583111	7.66886	7.333	0.610539	10.4704
M76-2	243	05/30/2008	-22.0957	13.8615	103	17.5	0.824275	0.0588474	7.75808	7.402	0.616284	10.4726
M76-2	243	05/30/2008	-22.0957	13.8615	103	18.5	0.818283	0.0584196	7.72685	7.342	0.611288	10.4638
M76-2	243	05/30/2008	-22.0957	13.8615	103	19.5	0.810767	0.057883	7.67478	7.344	0.611455	10.5636
M76-2	243	05/30/2008	-22.0957	13.8615	103	20.5	0.771	0.0550439	7.275	7.124	0.593138	10.7757
M76-2	243	05/30/2008	-22.0957	13.8615	103	21.5	0.787	0.0561862	7.334	7.165	0.596551	10.6174
M76-2	243	05/30/2008	-22.0957	13.8615	103	22.5	0.809	0.0577568	7.584	7.449	0.620197	10.7381
M76-2	243	05/30/2008	-22.0957	13.8615	103	23.5	0.833	0.0594703	7.79	7.659	0.637681	10.7227
M76-2	243	05/30/2008	-22.0957	13.8615	103	24.5	0.781	0.0557578	7.29	7.235	0.60238	10.8035
M76-2	243	05/30/2008	-22.0957	13.8615	103	25.5	0.648	0.0462626	6.355	5.973	0.497307	10.7496
M76-2	243	05/30/2008	-22.0957	13.8615	103	26.5	0.652	0.0465482	6.528	6.04	0.502885	10.8035
M76-2	243	05/30/2008	-22.0957	13.8615	103	27.5	0.715	0.0510459	7.063	6.645	0.553257	10.8384
M76-2	243	05/30/2008	-22.0957	13.8615	103	28.5	0.723	0.051617	7.309	6.703	0.558086	10.812
M76-2	243	05/30/2008	-22.0957	13.8615	103	29.5	0.668	0.0476904	6.696	6.099	0.507797	10.6478
M76-2	243	05/30/2008	-22.0957	13.8615	103	30.5	0.723	0.051617	6.949	6.755	0.562415	10.8959
M76-2	243	05/30/2008	-22.0957	13.8615	103	31.5	0.787	0.0561862	7.564	7.472	0.622112	11.0723
M76-2	243	05/30/2008	-22.0957	13.8615	103	32.5	0.794	0.0566859	7.602	7.472	0.622112	10.9747
M76-2	243	05/30/2008	-22.0957	13.8615	103	33.5	0.675	0.0481902	6.757	6.375	0.530777	11.0142
M76-2	243	05/30/2008	-22.0957	13.8615	103	34.5	0.711	0.0507603	7.132	6.698	0.557669	10.9863
M76-2	243	05/30/2008	-22.0957	13.8615	103	35.5	0.632	0.0451203	6.36	5.981	0.497973	11.0366
M76-2	243	05/30/2008	-22.0957	13.8615	103	36.5	0.629	0.0449061	5.987	5.925	0.49331	10.9854
M76-2	243	05/30/2008	-22.0957	13.8615	103	37.5	0.606	0.0432641	5.819	5.72	0.476242	11.0078
M76-2	243	05/30/2008	-22.0957	13.8615	103	38.5	0.655	0.0467623	6.422	6.234	0.519037	11.0995

## Sheet: M103-1
Cruise	Station	mm/dd/yyyy	Latitude [degrees_north]	Longitude [degrees_east]	Bot. Depth [m]	Depth [cm]	TN [%]	TN [%] / 14.007	TC [%]	OC [%]	OC [%] / 12.0107	CaCO3 [%]	C:N ratio
M103-1	2279	12/27/2013	-23.2497	14.0001	151.3	0	1.1264	0.0804171	9.06332	7.77447	0.647295	10.7404	8.04923
M103-1	2279	12/27/2013	-23.2497	14.0001	151.3	1	1.34763	0.0962114	10.9378	9.51319	0.792059	11.872	8.23249
M103-1	2279	12/27/2013	-23.2497	14.0001	151.3	2	1.51895	0.108442	12.4007	10.7481	0.894874	13.7722	8.2521
M103-1	2279	12/27/2013	-23.2497	14.0001	151.3	3	1.40405	0.100239	11.4444	9.87596	0.822263	13.0707	8.203
M103-1	2279	12/27/2013	-23.2497	14.0001	151.3	4	1.50131	0.107183	12.4776	10.8382	0.902379	13.6616	8.41904
M103-1	2279	12/27/2013	-23.2497	14.0001	151.3	5	1.515	0.10816	12.896	11.0138	0.917001	15.6851	8.47818
M103-1	2279	12/27/2013	-23.2497	14.0001	151.3	6	1.42861	0.101992	12.312	10.4557	0.870531	15.4693	8.53525
M103-1	2279	12/27/2013	-23.2497	14.0001	151.3	7	1.37533	0.0981886	12.1767	10.267	0.85482	15.9143	8.7059
M103-1	2279	12/27/2013	-23.2497	14.0001	151.3	8	1.41206	0.100811	12.7069	10.5302	0.876736	18.139	8.6968
M103-1	2279	12/27/2013	-23.2497	14.0001	151.3	9	1.39639	0.0996926	12.7387	10.5021	0.874392	18.639	8.77088
M103-1	2280	12/27/2013	-23.2494	13.4999	234.1	0	0.735179	0.0524866	13.577	6.26099	0.521285	60.9665	9.93177
M103-1	2280	12/27/2013	-23.2494	13.4999	234.1	1	0.675968	0.0482593	13.1502	5.60154	0.466379	62.9059	9.66401
M103-1	2280	12/27/2013	-23.2494	13.4999	234.1	2	0.569462	0.0406555	11.8528	4.94228	0.41149	57.5874	10.1214
M103-1	2280	12/27/2013	-23.2494	13.4999	234.1	3	0.589433	0.0420813	12.2065	4.83633	0.402668	61.4179	9.56882
M103-1	2280	12/27/2013	-23.2494	13.4999	234.1	4	0.594041	0.0424103	12.1151	5.01809	0.417802	59.1417	9.85142
M103-1	2280	12/27/2013	-23.2494	13.4999	234.1	5	0.530316	0.0378608	11.3697	4.53848	0.37787	56.9267	9.9805
M103-1	2280	12/27/2013	-23.2494	13.4999	234.1	6	0.469754	0.0335371	10.4153	3.99162	0.332338	53.5308	9.90957
M103-1	2280	12/27/2013	-23.2494	13.4999	234.1	7	0.446698	0.0318911	9.66166	3.85457	0.320928	48.3924	10.0633
M103-1	2280	12/27/2013	-23.2494	13.4999	234.1	8	0.540928	0.0386184	10.9233	4.59643	0.382694	52.7242	9.90964
M103-1	2280	12/27/2013	-23.2494	13.4999	234.1	9	0.593732	0.0423882	11.7935	5.02258	0.418175	56.4241	9.86536
M103-1	2281	12/28/2013	-24.0002	14.2495	127	0	1.24027	0.0885462	9.13966	7.98451	0.664783	9.62619	7.50776
M103-1	2281	12/28/2013	-24.0002	14.2495	127	1	1.45771	0.10407	10.7084	9.31303	0.775394	11.6284	7.45067
M103-1	2281	12/28/2013	-24.0002	14.2495	127	2	1.58983	0.113503	12.051	10.5126	0.875271	12.8195	7.71145
M103-1	2281	12/28/2013	-24.0002	14.2495	127	3	1.64766	0.117631	12.3158	10.8007	0.899259	12.6253	7.64474
M103-1	2281	12/28/2013	-24.0002	14.2495	127	4	1.55226	0.11082	11.6297	10.1268	0.843145	12.5246	7.60821
M103-1	2281	12/28/2013	-24.0002	14.2495	127	5	1.56329	0.111608	11.5673	10.2317	0.851881	11.1299	7.63279
M103-1	2281	12/28/2013	-24.0002	14.2495	127	6	1.50531	0.107468	11.077	9.72455	0.809657	11.2703	7.53393
M103-1	2281	12/28/2013	-24.0002	14.2495	127	7	1.45648	0.103983	10.8717	9.49765	0.790766	11.4505	7.6048
M103-1	2281	12/28/2013	-24.0002	14.2495	127	8	1.41711	0.101171	10.815	9.32085	0.776046	12.4511	7.6706
M103-1	2281	12/28/2013	-24.0002	14.2495	127	9	1.17925	0.0841898	9.61306	8.01698	0.667486	13.3007	7.92835
M103-1	2282	12/28/2013	-24.6003	14.1995	150.9	0	1.26828	0.0905461	11.1529	10.1468	0.84481	8.38476	9.33017
M103-1	2282	12/28/2013	-24.6003	14.1995	150.9	1	1.8748	0.133847	15.025	12.8541	1.07022	18.0902	7.99587
M103-1	2282	12/28/2013	-24.6003	14.1995	150.9	2	1.81168	0.129341	14.4511	12.4142	1.03359	16.9745	7.99121
M103-1	2282	12/28/2013	-24.6003	14.1995	150.9	3	1.81514	0.129588	14.5454	12.4344	1.03527	17.5919	7.98896
M103-1	2282	12/28/2013	-24.6003	14.1995	150.9	4	1.6986	0.121268	13.5948	11.7053	0.974574	15.7461	8.03651
M103-1	2282	12/28/2013	-24.6003	14.1995	150.9	5	1.75345	0.125184	14.1926	12.0603	1.00413	17.7698	8.02122
M103-1	2282	12/28/2013	-24.6003	14.1995	150.9	6	1.78678	0.127563	14.4804	12.3809	1.03083	17.4959	8.08091
M103-1	2282	12/28/2013	-24.6003	14.1995	150.9	7	1.70566	0.121772	13.9251	11.8195	0.984083	17.5466	8.08135
M103-1	2282	12/28/2013	-24.6003	14.1995	150.9	8	1.50876	0.107715	12.9022	10.8542	0.903714	17.0663	8.38988
M103-1	2282	12/28/2013	-24.6003	14.1995	150.9	9	1.67324	0.119458	15.0117	12.2862	1.02294	22.7122	8.5632
M103-1	2283	12/28/2013	-25.0661	14.7332	52.2	0	0.878627	0.0627277	6.44727	6.09543	0.5075	2.93193	8.09053
M103-1	2283	12/28/2013	-25.0661	14.7332	52.2	1	0.434387	0.0310121	3.21142	2.89615	0.241131	2.62722	7.77539
M103-1	2283	12/28/2013	-25.0661	14.7332	52.2	2	0.296631	0.0211774	2.16837	1.96005	0.163192	1.736	7.70595
M103-1	2283	12/28/2013	-25.0661	14.7332	52.2	3	0.35084	0.0250475	2.65938	2.46189	0.204975	1.64574	8.18345
M103-1	2283	12/28/2013	-25.0661	14.7332	52.2	4	0.372281	0.0265782	2.85854	2.3993	0.199764	3.82699	7.51608
M103-1	2283	12/28/2013	-25.0661	14.7332	52.2	5	0.84224	0.06013	6.59269	5.66241	0.471447	7.75238	7.84047
M103-1	2283	12/28/2013	-25.0661	14.7332	52.2	6	0.815067	0.05819	6.38391	6.26812	0.521878	0.964849	8.96852
M103-1	2283	12/28/2013	-25.0661	14.7332	52.2	7	0.566599	0.0404511	4.4724	4.18957	0.34882	2.35689	8.62325
M103-1	2283	12/28/2013	-25.0661	14.7332	52.2	8	0.341592	0.0243873	2.77069	2.74642	0.228665	0.202234	9.37639
M103-1	2283	12/28/2013	-25.0661	14.7332	52.2	9	0.334223	0.0238611	2.76951	2.41917	0.201418	2.91946	8.44126
M103-1	2285	12/29/2013	-25.1993	14.3331	158.6	0	1.51125	0.107892	13.0202	11.5745	0.963686	12.0471	8.93194
M103-1	2285	12/29/2013	-25.1993	14.3331	158.6	1	1.56269	0.111565	13.1657	11.5595	0.962434	13.3853	8.6267
M103-1	2285	12/29/2013	-25.1993	14.3331	158.6	2	1.67658	0.119696	13.8669	12.3483	1.02811	12.6554	8.58932
M103-1	2285	12/29/2013	-25.1993	14.3331	158.6	3	1.66837	0.119109	13.7621	12.1833	1.01437	13.1569	8.51627
M103-1	2285	12/29/2013	-25.1993	14.3331	158.6	4	1.63374	0.116637	13.7175	12.0745	1.00531	13.692	8.61912
M103-1	2285	12/29/2013	-25.1993	14.3331	158.6	5	1.62481	0.116	13.7049	12.0841	1.00611	13.5067	8.6734
M103-1	2285	12/29/2013	-25.1993	14.3331	158.6	6	1.64175	0.117209	13.8959	11.9121	0.991792	16.5316	8.46172
M103-1	2285	12/29/2013	-25.1993	14.3331	158.6	7	1.58773	0.113352	13.6262	11.7938	0.981939	15.2702	8.66271
M103-1	2285	12/29/2013	-25.1993	14.3331	158.6	8	1.43204	0.102237	12.2571	10.587	0.881464	13.9174	8.62175
M103-1	2285	12/29/2013	-25.1993	14.3331	158.6	9	1.11045	0.0792783	9.70695	9.63103	0.801871	0.632678	10.1146
M103-1	2287	12/29/2013	-25.3499	13.8999	255	0	0.57418	0.0409924	7.87263	7.66779	0.638413	1.70699	15.574
M103-1	2288	12/29/2013	-25.4328	13.6673	421.4	0	0.603913	0.0431151	11.3087	5.45353	0.454056	48.7928	10.5312
M103-1	2288	12/29/2013	-25.4328	13.6673	421.4	1	0.582089	0.041557	10.5701	4.86051	0.404682	47.5798	9.738
M103-1	2288	12/29/2013	-25.4328	13.6673	421.4	2	0.565406	0.040366	10.5591	4.78783	0.39863	48.0938	9.87541
M103-1	2288	12/29/2013	-25.4328	13.6673	421.4	3	0.531411	0.037939	10.2795	4.42406	0.368344	48.7955	9.70884
M103-1	2288	12/29/2013	-25.4328	13.6673	421.4	4	0.570167	0.0407058	10.5213	4.81283	0.400712	47.5703	9.84409
M103-1	2288	12/29/2013	-25.4328	13.6673	421.4	5	0.573558	0.0409479	10.5821	4.714	0.392483	48.9011	9.58493
M103-1	2288	12/29/2013	-25.4328	13.6673	421.4	6	0.571274	0.0407849	10.7021	4.76348	0.396603	49.4889	9.72426
M103-1	2288	12/29/2013	-25.4328	13.6673	421.4	7	0.528602	0.0377384	10.2188	4.76597	0.39681	45.44	10.5148
M103-1	2288	12/29/2013	-25.4328	13.6673	421.4	8	0.572307	0.0408586	10.8421	4.7881	0.398653	50.4501	9.75688
M103-1	2288	12/29/2013	-25.4328	13.6673	421.4	9	0.542492	0.0387301	10.4979	2.89324	0.240888	63.3721	6.21968
M103-1	2289	12/30/2013	-25.4889	13.5007	702	0	1.03214	0.0736875	14.7931	9.14422	0.761339	47.0743	10.332
M103-1	2289	12/30/2013	-25.4889	13.5007	702	1	1.002	0.0715353	13.7577	8.48445	0.706408	43.9441	9.87495
M103-1	2289	12/30/2013	-25.4889	13.5007	702	2	1.03285	0.0737384	14.152	8.70431	0.724713	45.3978	9.82817
M103-1	2289	12/30/2013	-25.4889	13.5007	702	3	1.01821	0.0726929	13.8938	8.56495	0.71311	44.407	9.8099
M103-1	2289	12/30/2013	-25.4889	13.5007	702	4	1.04707	0.0747535	14.1505	8.63177	0.718673	45.9898	9.61391
M103-1	2289	12/30/2013	-25.4889	13.5007	702	5	1.0373	0.0740559	14.3182	8.70247	0.72456	46.798	9.78396
M103-1	2289	12/30/2013	-25.4889	13.5007	702	6	1.06997	0.0763884	14.7855	9.04637	0.753193	47.8261	9.86005
M103-1	2289	12/30/2013	-25.4889	13.5007	702	7	1.056	0.0753911	14.6615	8.89332	0.74045	48.068	9.82145
M103-1	2289	12/30/2013	-25.4889	13.5007	702	8	1.04651	0.0747133	14.5133	8.34835	0.695076	51.3742	9.30325
M103-1	2289	12/30/2013	-25.4889	13.5007	702	9	1.06864	0.076293	14.8087	8.95053	0.745213	48.8179	9.76778
M103-1	2290	41638	-25.5499	13.3332	1125.6	0	0.896485	0.0640026	13.1252	7.616	0.634101	45.9102	9.90743
M103-1	2290	41638	-25.5499	13.3332	1125.6	1	0.977178	0.0697635	14.0593	8.00933	0.66685	50.4161	9.55871
M103-1	2290	41638	-25.5499	13.3332	1125.6	2	0.967695	0.0690865	13.8581	8.04996	0.670232	48.4008	9.70135
M103-1	2290	41638	-25.5499	13.3332	1125.6	3	0.945323	0.0674893	13.9783	7.91124	0.658683	50.5587	9.75981
M103-1	2290	41638	-25.5499	13.3332	1125.6	4	0.971129	0.0693317	13.9367	7.52836	0.626805	53.4027	9.04066
M103-1	2290	41638	-25.5499	13.3332	1125.6	5	0.969418	0.0692096	14.3913	8.0809	0.672809	52.5863	9.72133
M103-1	2290	41638	-25.5499	13.3332	1125.6	6	0.965818	0.0689525	14.3376	8.01932	0.667681	52.6526	9.68321
M103-1	2290	41638	-25.5499	13.3332	1125.6	7	1.01527	0.0724834	14.5198	7.96252	0.662952	54.6441	9.14627
M103-1	2290	41638	-25.5499	13.3332	1125.6	8	0.973583	0.0695069	14.3586	8.16099	0.679477	51.6466	9.77568
M103-1	2290	41638	-25.5499	13.3332	1125.6	9	0.970325	0.0692743	14.3972	7.66757	0.638395	56.0803	9.21547
M103-1	2291	12/30/2013	-25.6662	12.999	2354.1	0	0.958296	0.0684155	13.9043	8.32118	0.692814	46.5261	10.1266
M103-1	2291	12/30/2013	-25.6662	12.999	2354.1	1	0.92447	0.0660006	13.1752	7.59468	0.632326	46.5047	9.58062
M103-1	2291	12/30/2013	-25.6662	12.999	2354.1	2	0.92935	0.066349	13.3851	7.16511	0.596561	51.8336	8.99126
M103-1	2291	12/30/2013	-25.6662	12.999	2354.1	3	0.949934	0.0678185	13.7191	7.72504	0.64318	49.9507	9.48384
M103-1	2291	12/30/2013	-25.6662	12.999	2354.1	4	0.967846	0.0690973	13.984	7.90307	0.658002	50.6741	9.52283
M103-1	2291	12/30/2013	-25.6662	12.999	2354.1	5	0.955646	0.0682263	13.975	7.69072	0.640323	52.369	9.38527
M103-1	2291	12/30/2013	-25.6662	12.999	2354.1	6	0.993058	0.0708972	14.132	7.8795	0.65604	52.1042	9.25339
M103-1	2291	12/30/2013	-25.6662	12.999	2354.1	7	0.967844	0.0690972	14.1618	7.8929	0.657156	52.2404	9.5106
M103-1	2291	12/30/2013	-25.6662	12.999	2354.1	8	0.970102	0.0692584	14.2521	7.94014	0.661089	52.5996	9.54526
M103-1	2291	12/30/2013	-25.6662	12.999	2354.1	9	0.985379	0.070349	14.2703	8.04129	0.669511	51.9083	9.51698
M103-1	1	41640	-28.6336	16.2662	45.8	0	0.0412047	0.00294172	0.209353	0.177866	0.014809	0.262384	5.03413
M103-1	1	41640	-28.6336	16.2662	45.8	1	0.0350611	0.00250311	0.174032	0.146379	0.0121874	0.230447	4.86888
M103-1	1	41640	-28.6336	16.2662	45.8	2	0.0339616	0.00242462	0.191938	0.173749	0.0144662	0.151571	5.96639
M103-1	1	41640	-28.6336	16.2662	45.8	3	0.0334407	0.00238743	0.183387	0.163646	0.013625	0.164508	5.70699
M103-1	1	41640	-28.6336	16.2662	45.8	4	0.0316839	0.002262	0.167986	0.147104	0.0122477	0.174016	5.41455
M103-1	1	41640	-28.6336	16.2662	45.8	5	0.0444998	0.00317697	0.195193	0.156613	0.0130395	0.321495	4.10438
M103-1	1	41640	-28.6336	16.2662	45.8	6	0.0383809	0.00274012	0.161035	0.125494	0.0104485	0.296175	3.81315
M103-1	1	41640	-28.6336	16.2662	45.8	7	0.0431123	0.00307791	0.180782	0.128588	0.0107061	0.434949	3.47836
M103-1	1	41640	-28.6336	16.2662	45.8	8	0.0375056	0.00267764	0.142931	0.0956659	0.00796506	0.393879	2.97466
M103-1	1	41640	-28.6336	16.2662	45.8	9	0.0355431	0.00253752	0.132796	0.0917318	0.00763751	0.342197	3.00983
M103-1	2	41640	-28.6362	15.9996	121.6	0	0.12216	0.00872137	1.35981	0.961215	0.0800299	3.32163	9.17629
M103-1	2	41640	-28.6362	15.9996	121.6	1	0.147609	0.0105383	1.45185	0.908625	0.0756513	4.52686	7.17873
M103-1	2	41640	-28.6362	15.9996	121.6	2	0.168969	0.0120632	1.67111	1.0811	0.090011	4.91677	7.46161
M103-1	2	41640	-28.6362	15.9996	121.6	3	0.140816	0.0100533	1.42125	0.862213	0.0717871	4.65862	7.14066
M103-1	2	41640	-28.6362	15.9996	121.6	4	0.151017	0.0107815	1.51833	0.933936	0.0777587	4.86995	7.21221
M103-1	2	41640	-28.6362	15.9996	121.6	5	0.141009	0.0100671	1.40023	0.86884	0.0723388	4.42825	7.18569
M103-1	2	41640	-28.6362	15.9996	121.6	6	0.137296	0.00980198	1.34902	0.837943	0.0697663	4.25896	7.11758
M103-1	2	41640	-28.6362	15.9996	121.6	7	0.128955	0.00920644	1.29919	0.779321	0.0648855	4.33223	7.04784
M103-1	2	41640	-28.6362	15.9996	121.6	8	0.133253	0.00951335	1.31558	0.817485	0.068063	4.15079	7.15448
M103-1	2	41640	-28.6362	15.9996	121.6	9	0.13853	0.00989006	1.37696	0.845784	0.0704192	4.42647	7.1202
M103-1	3	41640	-28.633	15.667	164.2	0	0.2553	0.0182266	8.24675	2.14955	0.17897	50.81	9.81915
M103-1	3	41640	-28.633	15.667	164.2	1	0.263184	0.0187895	7.97551	1.81743	0.151317	51.3173	8.05331
M103-1	3	41640	-28.633	15.667	164.2	2	0.272652	0.0194654	8.15332	1.8825	0.156736	52.2568	8.05201
M103-1	3	41640	-28.633	15.667	164.2	3	0.270973	0.0193456	8.15164	1.93331	0.160965	51.8194	8.32054
M103-1	3	41640	-28.633	15.667	164.2	4	0.259194	0.0185046	7.88237	1.99	0.165685	49.1031	8.95373
M103-1	3	41640	-28.633	15.667	164.2	5	0.216612	0.0154646	7.20037	1.81239	0.150898	44.8998	9.75766
M103-1	3	41640	-28.633	15.667	164.2	6	0.252068	0.0179958	7.75937	1.95101	0.16244	48.403	9.02651
M103-1	3	41640	-28.633	15.667	164.2	7	0.229309	0.016371	7.532	1.85576	0.154509	47.302	9.43795
M103-1	3	41640	-28.633	15.667	164.2	8	0.211943	0.0151312	7.52685	1.79274	0.149262	47.7842	9.86453
M103-1	3	41640	-28.633	15.667	164.2	9	0.208859	0.014911	7.57426	1.80059	0.149916	48.1138	10.054
M103-1	4	41641	-28.633	15.3321	191.9	0	0.281047	0.0200647	11.6358	2.42398	0.201818	76.765	10.0583
M103-1	4	41641	-28.633	15.3321	191.9	1	0.267436	0.019093	11.2874	2.10754	0.175472	76.4987	9.19038
M103-1	4	41641	-28.633	15.3321	191.9	2	0.282758	0.0201869	11.2759	2.34723	0.195429	74.4054	9.68097
M103-1	4	41641	-28.633	15.3321	191.9	3	0.284263	0.0202943	11.2182	2.4311	0.202411	73.2257	9.97377
M103-1	4	41641	-28.633	15.3321	191.9	4	0.277241	0.019793	11.1506	1.90049	0.158233	77.084	7.9944
M103-1	4	41641	-28.633	15.3321	191.9	5	0.245738	0.0175439	10.8995	2.05599	0.17118	73.696	9.7572
M103-1	4	41641	-28.633	15.3321	191.9	6	0.267238	0.0190789	11.2315	2.22944	0.185621	75.017	9.72911
M103-1	4	41641	-28.633	15.3321	191.9	7	0.270942	0.0193433	11.2836	2.20824	0.183856	75.6278	9.50489
M103-1	4	41641	-28.633	15.3321	191.9	8	0.275272	0.0196524	11.2118	2.43653	0.202863	73.127	10.3225
M103-1	4	41641	-28.633	15.3321	191.9	9	0.278566	0.0198876	11.3479	2.22295	0.18508	76.0413	9.30631
M103-1	5	41641	-28.6333	14.9993	176.7	0	0.209366	0.0149472	12.1468	1.94418	0.16187	85.0217	10.8295
M103-1	5	41641	-28.6333	14.9993	176.7	1	0.208699	0.0148996	11.9548	1.75242	0.145905	85.0196	9.79248
M103-1	5	41641	-28.6333	14.9993	176.7	2	0.212936	0.0152021	11.9271	1.76075	0.146598	84.7195	9.64329
M103-1	5	41641	-28.6333	14.9993	176.7	3	0.228968	0.0163466	11.9876	1.77868	0.148091	85.0744	9.05943
M103-1	5	41641	-28.6333	14.9993	176.7	4	0.216679	0.0154693	11.9803	1.88524	0.156964	84.1259	10.1468
M103-1	5	41641	-28.6333	14.9993	176.7	5	0.214882	0.0153411	11.9157	1.74042	0.144906	84.794	9.44562
M103-1	5	41641	-28.6333	14.9993	176.7	6	0.21552	0.0153866	11.9614	1.82905	0.152285	84.436	9.89727
M103-1	5	41641	-28.6333	14.9993	176.7	7	0.213871	0.0152688	11.9563	1.71946	0.143161	85.307	9.376
M103-1	5	41641	-28.6333	14.9993	176.7	8	0.211979	0.0151338	11.5872	1.93345	0.160977	80.4483	10.6369
M103-1	5	41641	-28.6333	14.9993	176.7	9	0.223136	0.0159303	12.051	1.92722	0.160459	84.3649	10.0726
M103-1	6	41641	-28.6329	14.6665	165.7	0	0.129331	0.00923329	11.5519	1.25064	0.104128	85.844	11.2774
M103-1	7	41641	-28.6393	14.4166	376.7	0	0.326357	0.0232996	12.01	2.85505	0.237709	76.2909	10.2023
M103-1	7	41641	-28.6393	14.4166	376.7	1	0.310236	0.0221486	11.7774	2.40219	0.200004	78.1264	9.03008
M103-1	7	41641	-28.6393	14.4166	376.7	2	0.318834	0.0227624	11.9272	2.54522	0.211912	78.1836	9.30974
M103-1	7	41641	-28.6393	14.4166	376.7	3	0.31296	0.0223431	11.8217	2.53464	0.211032	77.3922	9.44504
M103-1	7	41641	-28.6393	14.4166	376.7	4	0.306859	0.0219075	11.9015	2.46419	0.205166	78.6439	9.36509
M103-1	7	41641	-28.6393	14.4166	376.7	5	0.294605	0.0210327	11.8578	2.50178	0.208296	77.9668	9.9034
M103-1	7	41641	-28.6393	14.4166	376.7	6	0.26657	0.0190312	11.7928	2.19197	0.182501	80.0068	9.58959
M103-1	7	41641	-28.6393	14.4166	376.7	7	0.361466	0.0258061	11.057	2.96365	0.246751	67.4446	9.56172
M103-1	7	41641	-28.6393	14.4166	376.7	8	0.275685	0.019682	11.7895	2.20119	0.183269	79.9029	9.31152
M103-1	7	41641	-28.6393	14.4166	376.7	9	0.272293	0.0194398	11.7092	2.13398	0.177673	79.7936	9.13966
M103-1	8	41641	-28.6331	14.2499	735.8	0	0.431678	0.0308187	11.4728	3.43759	0.286211	66.9597	9.28691
M103-1	8	41641	-28.6331	14.2499	735.8	1	0.365206	0.0260731	10.8265	2.99481	0.249345	65.2637	9.56332
M103-1	8	41641	-28.6331	14.2499	735.8	2	0.355905	0.0254091	10.8594	2.93485	0.244353	66.0379	9.61676
M103-1	8	41641	-28.6331	14.2499	735.8	3	0.348165	0.0248565	10.7876	2.87394	0.239281	65.9471	9.62652
M103-1	8	41641	-28.6331	14.2499	735.8	4	0.35179	0.0251153	10.9534	2.8811	0.239878	67.2695	9.55106
M103-1	8	41641	-28.6331	14.2499	735.8	5	0.362735	0.0258967	10.8896	2.89878	0.24135	66.5898	9.31972
M103-1	8	41641	-28.6331	14.2499	735.8	6	0.360413	0.0257309	10.9347	2.79353	0.232587	67.8433	9.03918
M103-1	8	41641	-28.6331	14.2499	735.8	7	0.263011	0.0187771	11.6704	1.89913	0.15812	81.4274	8.42089
M103-1	8	41641	-28.6331	14.2499	735.8	8	0.349473	0.0249499	10.8972	2.67312	0.222561	68.5339	8.92034
M103-1	8	41641	-28.6331	14.2499	735.8	9	0.335655	0.0239634	10.8188	2.47285	0.205888	69.5499	8.59176
M103-1	9	41642	-28.6336	13.783	2028.4	0	0.157903	0.0112731	9.30562	1.16195	0.096743	67.8639	8.58173
M103-1	9	41642	-28.6336	13.783	2028.4	1	0.12709	0.00907332	9.52165	0.974147	0.0811066	71.2292	8.93903
M103-1	9	41642	-28.6336	13.783	2028.4	2	0.0959424	0.0068496	9.45535	0.786017	0.0654431	72.2445	9.55429
M103-1	9	41642	-28.6336	13.783	2028.4	3	0.0846211	0.00604134	9.55196	0.758505	0.0631525	73.2788	10.4534
M103-1	9	41642	-28.6336	13.783	2028.4	4	0.0888597	0.00634395	9.64656	0.660924	0.0550279	74.8803	8.67408
M103-1	9	41642	-28.6336	13.783	2028.4	5	0.0915652	0.0065371	9.78905	0.801571	0.0667381	74.8957	10.2091
M103-1	9	41642	-28.6336	13.783	2028.4	6	0.0831012	0.00593283	9.81977	0.771628	0.064245	75.4012	10.8287
M103-1	9	41642	-28.6336	13.783	2028.4	7	0.0962437	0.00687111	9.81905	0.758987	0.0631926	75.5006	9.19684
M103-1	9	41642	-28.6336	13.783	2028.4	8	0.0934484	0.00667155	9.93628	0.814191	0.0677888	76.0174	10.1609
M103-1	9	41642	-28.6336	13.783	2028.4	9	0.102531	0.00732	9.92761	0.816337	0.0679674	75.9273	9.28517
M103-1	10	41644	-23.0381	12.3101	2100.6	0	0.234919	0.0167715	10.0811	1.90548	0.158648	68.1305	9.45939
M103-1	10	41644	-23.0381	12.3101	2100.6	1	0.185945	0.0132752	10.3075	1.67594	0.139538	71.9296	10.5112
M103-1	10	41644	-23.0381	12.3101	2100.6	2	0.200999	0.0143499	10.517	1.78996	0.149031	72.7251	10.3855
M103-1	10	41644	-23.0381	12.3101	2100.6	3	0.199138	0.0142171	10.327	1.72059	0.143255	71.7204	10.0762
M103-1	10	41644	-23.0381	12.3101	2100.6	4	0.216648	0.0154671	10.5136	1.74534	0.145316	73.0685	9.39514
M103-1	10	41644	-23.0381	12.3101	2100.6	5	0.209254	0.0149393	10.5625	1.73861	0.144755	73.5322	9.68956
M103-1	10	41644	-23.0381	12.3101	2100.6	6	0.202528	0.0144591	10.5227	1.69626	0.141229	73.5535	9.7675
M103-1	10	41644	-23.0381	12.3101	2100.6	7	0.20264	0.0144671	10.4524	1.67241	0.139243	73.1666	9.62483
M103-1	10	41644	-23.0381	12.3101	2100.6	8	0.196315	0.0140155	10.4619	1.73687	0.14461	72.7088	10.3179
M103-1	10	41644	-23.0381	12.3101	2100.6	9	0.207256	0.0147966	10.4997	1.66857	0.138923	73.5928	9.38885
M103-1	14	41645	-23.0163	13.0327	458.4	0	0.258063	0.0184238	10.8387	1.76388	0.146859	75.6238	7.97113
M103-1	14	41645	-23.0163	13.0327	458.4	1	0.267877	0.0191245	11.0481	2.09871	0.174737	74.5782	9.13681
M103-1	14	41645	-23.0163	13.0327	458.4	2	0.247376	0.0176609	10.9912	1.87704	0.15628	75.9514	8.84894
M103-1	14	41645	-23.0163	13.0327	458.4	3	0.282561	0.0201728	10.971	1.99858	0.1664	74.7704	8.24872
M103-1	14	41645	-23.0163	13.0327	458.4	4	0.26965	0.0192511	11.0296	1.95066	0.16241	75.6575	8.43643
M103-1	14	41645	-23.0163	13.0327	458.4	5	0.265882	0.0189821	11.2502	1.47597	0.122888	81.4517	6.47389
M103-1	14	41645	-23.0163	13.0327	458.4	6	0.265808	0.0189768	11.2789	1.82686	0.152102	78.7668	8.01516
M103-1	14	41645	-23.0163	13.0327	458.4	7	0.243106	0.017356	10.6821	1.63516	0.136142	75.3909	7.84407
M103-1	14	41645	-23.0163	13.0327	458.4	8	0.231608	0.0165352	10.5372	1.78642	0.148735	72.9233	8.99508
M103-1	14	41645	-23.0163	13.0327	458.4	9	0.241529	0.0172435	10.7972	1.71198	0.142538	75.7099	8.26622
M103-1	18	41646	-23.0065	13.3354	362	0	0.330266	0.0235787	11.5991	2.35677	0.196223	77.0193	8.32205
M103-1	18	41646	-23.0065	13.3354	362	1	0.319685	0.0228232	11.7637	2.51782	0.209631	77.0492	9.18498
M103-1	18	41646	-23.0065	13.3354	362	2	0.325655	0.0232494	11.694	2.52933	0.21059	76.3719	9.05786
M103-1	18	41646	-23.0065	13.3354	362	3	0.347513	0.0248099	12.2017	2.70586	0.225287	79.1319	9.08053
M103-1	18	41646	-23.0065	13.3354	362	4	0.33654	0.0240266	11.5968	2.23051	0.18571	78.0525	7.72936
M103-1	18	41646	-23.0065	13.3354	362	5	0.345909	0.0246955	11.5656	2.50642	0.208682	75.4931	8.45021
M103-1	18	41646	-23.0065	13.3354	362	6	0.340073	0.0242788	11.5481	2.76477	0.230192	73.1946	9.48123
M103-1	18	41646	-23.0065	13.3354	362	7	0.325718	0.023254	11.2887	2.75991	0.229787	71.0731	9.88164
M103-1	18	41646	-23.0065	13.3354	362	8	0.322153	0.0229994	11.4235	2.65318	0.220901	73.0862	9.60464
M103-1	18	41646	-23.0065	13.3354	362	9	0.316245	0.0225776	11.2467	2.30273	0.191724	74.5335	8.49176
M103-1	20	41646	-23.003	13.5026	242.3	0	0.753199	0.053773	14.2907	6.57981	0.547829	64.2578	10.1878
M103-1	20	41646	-23.003	13.5026	242.3	1	0.733321	0.0523539	13.7349	4.31666	0.359401	78.4854	6.86483
M103-1	20	41646	-23.003	13.5026	242.3	2	0.695143	0.0496282	13.3693	5.8612	0.487998	62.5676	9.83307
M103-1	20	41646	-23.003	13.5026	242.3	3	0.700115	0.0499832	13.3751	5.93475	0.494122	62.0026	9.88576
M103-1	20	41646	-23.003	13.5026	242.3	4	0.702179	0.0501306	13.309	5.82545	0.485022	62.3629	9.67517
M103-1	20	41646	-23.003	13.5026	242.3	5	0.712084	0.0508377	13.448	5.9499	0.495383	62.4844	9.74441
M103-1	20	41646	-23.003	13.5026	242.3	6	0.646385	0.0461473	12.6102	5.34717	0.4452	60.5253	9.64738
M103-1	20	41646	-23.003	13.5026	242.3	7	0.629351	0.0449312	12.6113	4.83131	0.402251	64.8329	8.9526
M103-1	20	41646	-23.003	13.5026	242.3	8	0.614591	0.0438774	12.7488	4.77713	0.39774	66.4309	9.06479
M103-1	20	41646	-23.003	13.5026	242.3	9	0.570324	0.0407171	12.3159	4.84726	0.403578	62.2385	9.91177
M103-1	22	41646	-22.9943	13.675	155.7	0	0.630878	0.0450402	13.4361	5.18257	0.431496	68.7794	9.58024
M103-1	22	41646	-22.9943	13.675	155.7	1	0.683357	0.0487868	13.3934	5.54429	0.461613	65.4093	9.46183
M103-1	22	41646	-22.9943	13.675	155.7	2	0.518832	0.0370409	12.9979	3.92341	0.326659	75.6207	8.81888
M103-1	22	41646	-22.9943	13.675	155.7	3	0.546614	0.0390243	13.3866	4.26968	0.355489	75.9744	9.10943
M103-1	22	41646	-22.9943	13.675	155.7	4	0.514423	0.0367261	13.1348	4.06256	0.338245	75.602	9.20993
M103-1	22	41646	-22.9943	13.675	155.7	5	0.49398	0.0352666	13.0849	3.89782	0.324529	76.5586	9.20216
M103-1	22	41646	-22.9943	13.675	155.7	6	0.527836	0.0376837	13.1297	4.02993	0.335528	75.8318	8.9038
M103-1	22	41646	-22.9943	13.675	155.7	7	0.465144	0.033208	12.8039	3.71335	0.30917	75.755	9.31011
M103-1	22	41646	-22.9943	13.675	155.7	8	0.410267	0.0292901	12.4261	3.08265	0.256658	77.8618	8.76262
M103-1	22	41646	-22.9943	13.675	155.7	9	0.45933	0.0327929	12.8152	3.46067	0.288132	77.9541	8.78641
M103-1	34	41648	-23.0001	14.3663	44.8	0	0.95907	0.0684708	7.45321	7.27653	0.605838	1.47233	8.84812
M103-1	34	41648	-23.0001	14.3663	44.8	1	0.894512	0.0638618	6.74999	6.59055	0.548723	1.32873	8.59235
M103-1	34	41648	-23.0001	14.3663	44.8	2	1.00397	0.0716761	7.64273	7.46081	0.621181	1.51601	8.6665
M103-1	34	41648	-23.0001	14.3663	44.8	3	1.0866	0.0775754	8.32196	7.91652	0.659122	3.37872	8.49653
M103-1	34	41648	-23.0001	14.3663	44.8	4	0.993017	0.0708943	7.67085	7.28002	0.606128	3.25694	8.54974
M103-1	34	41648	-23.0001	14.3663	44.8	5	1.08594	0.0775281	8.35907	7.8749	0.655657	4.03479	8.45702
M103-1	34	41648	-23.0001	14.3663	44.8	6	0.923859	0.065957	7.15988	6.70783	0.558488	3.76709	8.46745
M103-1	34	41648	-23.0001	14.3663	44.8	7	1.15298	0.0823149	8.64752	8.33487	0.693954	2.60546	8.43047
M103-1	34	41648	-23.0001	14.3663	44.8	8	1.14776	0.0819415	8.6963	8.36077	0.69611	2.79612	8.4952
M103-1	34	41648	-23.0001	14.3663	44.8	9	0.936458	0.0668564	7.26908	6.8714	0.572106	3.314	8.55724
M103-1	35	41648	-22.002	13.6685	120.7	0	1.30406	0.0931007	13.4308	11.4431	0.952739	16.5642	10.2334
M103-1	36	41648	-20.9957	12.8311	306.1	0	0.831477	0.0593615	13.3832	7.87918	0.656014	45.867	11.0512
M103-1	36	41648	-20.9957	12.8311	306.1	1	0.878793	0.0627395	13.3708	7.45838	0.620978	49.2702	9.89771
M103-1	36	41648	-20.9957	12.8311	306.1	2	0.88429	0.063132	13.5132	7.83232	0.652112	47.3409	10.3293
M103-1	36	41648	-20.9957	12.8311	306.1	3	0.910232	0.064984	13.6452	8.02108	0.667828	46.8677	10.2768
M103-1	36	41648	-20.9957	12.8311	306.1	4	0.906178	0.0646947	13.8109	8.32249	0.692923	45.7366	10.7107
M103-1	36	41648	-20.9957	12.8311	306.1	5	0.879526	0.0627919	13.6076	8.03633	0.669098	46.427	10.6558
M103-1	36	41648	-20.9957	12.8311	306.1	6	0.862386	0.0615682	13.4787	7.89755	0.657543	46.5095	10.6799
M103-1	36	41648	-20.9957	12.8311	306.1	7	0.860761	0.0614522	13.5449	7.91298	0.658827	46.933	10.721
M103-1	36	41648	-20.9957	12.8311	306.1	8	0.798824	0.0570304	13.1377	7.36427	0.613142	48.1118	10.7512
M103-1	36	41648	-20.9957	12.8311	306.1	9	0.841363	0.0600673	13.7776	7.54295	0.628019	51.9553	10.4552
M103-1	39	41649	-19.4842	12.1663	233	0	0.964302	0.0688443	10.9143	8.66242	0.721225	18.7655	10.4762
M103-1	39	41649	-19.4842	12.1663	233	1	0.925608	0.0660818	10.6809	7.69672	0.640822	24.8681	9.69741
M103-1	39	41649	-19.4842	12.1663	233	2	0.845141	0.060337	10.1933	7.03368	0.585618	26.3303	9.70577
M103-1	39	41649	-19.4842	12.1663	233	3	0.741923	0.052968	9.68311	6.25845	0.521073	28.5388	9.83751
M103-1	39	41649	-19.4842	12.1663	233	4	0.71731	0.0512108	9.69376	5.91167	0.4922	31.5174	9.61125
M103-1	39	41649	-19.4842	12.1663	233	5	0.686517	0.0490124	9.68839	5.64486	0.469986	33.6961	9.58913
M103-1	39	41649	-19.4842	12.1663	233	6	0.575004	0.0410512	8.98992	4.96187	0.413121	33.5671	10.0636
M103-1	39	41649	-19.4842	12.1663	233	7	0.536554	0.0383062	8.86551	4.51398	0.37583	36.2627	9.81122
M103-1	39	41649	-19.4842	12.1663	233	8	0.579554	0.041376	9.27772	4.95049	0.412174	36.0602	9.96166
M103-1	39	41649	-19.4842	12.1663	233	9	0.44611	0.0318491	8.93336	3.79711	0.316144	42.8021	9.92631
M103-1	41	41649	-19.0013	12.001	207	0	0.460234	0.0328575	4.33107	3.50438	0.291772	6.88903	8.87993
M103-1	41	41649	-19.0013	12.001	207	1	0.454714	0.0324634	4.29459	3.66909	0.305485	5.21247	9.41015
M103-1	41	41649	-19.0013	12.001	207	2	0.37421	0.026716	3.50803	3.03734	0.252886	3.92245	9.46572
M103-1	41	41649	-19.0013	12.001	207	3	0.402001	0.0287	3.80701	3.28137	0.273204	4.3803	9.51931
M103-1	41	41649	-19.0013	12.001	207	4	0.380957	0.0271976	3.72507	3.19142	0.265715	4.44708	9.76979
M103-1	41	41649	-19.0013	12.001	207	5	0.315177	0.0225014	3.24103	2.72055	0.226511	4.33735	10.0665
M103-1	41	41649	-19.0013	12.001	207	6	0.308693	0.0220385	3.12075	2.54936	0.212257	4.76161	9.63121
M103-1	41	41649	-19.0013	12.001	207	7	0.295813	0.0211189	3.08444	2.51318	0.209245	4.76043	9.90796
M103-1	41	41649	-19.0013	12.001	207	8	0.277066	0.0197805	2.89513	2.24898	0.187248	5.38464	9.46628
M103-1	41	41649	-19.0013	12.001	207	9	0.279068	0.0199234	2.8888	2.29627	0.191185	4.93774	9.59601
M103-1	43	41650	-17.2498	11.6652	77.6	0	0.687364	0.0490729	5.48475	4.94753	0.411926	4.4769	8.39417
M103-1	43	41650	-17.2498	11.6652	77.6	1	0.60324	0.043067	4.86715	4.50076	0.374729	3.05324	8.70106
M103-1	43	41650	-17.2498	11.6652	77.6	2	0.488009	0.0348404	4.71376	3.67169	0.305702	8.68391	8.77436
M103-1	43	41650	-17.2498	11.6652	77.6	3	0.604193	0.0431351	5.02051	4.5407	0.378055	3.99835	8.76444
M103-1	43	41650	-17.2498	11.6652	77.6	4	0.619363	0.0442181	5.06755	4.61443	0.384193	3.77602	8.6886
M103-1	43	41650	-17.2498	11.6652	77.6	5	0.668639	0.047736	5.94074	4.9974	0.416079	7.8612	8.71624
M103-1	43	41650	-17.2498	11.6652	77.6	6	0.623909	0.0445427	5.13089	4.65172	0.387298	3.99303	8.69499
M103-1	43	41650	-17.2498	11.6652	77.6	7	0.581373	0.0415059	4.82438	4.36018	0.363025	3.86831	8.74635
M103-1	43	41650	-17.2498	11.6652	77.6	8	0.57526	0.0410695	4.75087	4.29221	0.357366	3.82216	8.7015
M103-1	43	41650	-17.2498	11.6652	77.6	9	0.585069	0.0417697	4.87448	4.36747	0.363632	4.22508	8.70563
M103-1	44	41650	-17.2491	11.5012	148.3	0	0.194652	0.0138968	1.91697	1.57234	0.130912	2.87191	9.42029
M103-1	44	41650	-17.2491	11.5012	148.3	1	0.194816	0.0139085	1.88891	1.56553	0.130345	2.69481	9.37162
M103-1	44	41650	-17.2491	11.5012	148.3	2	0.192282	0.0137276	1.88138	1.54677	0.128782	2.78845	9.38129
M103-1	44	41650	-17.2491	11.5012	148.3	3	0.188878	0.0134846	1.86725	1.43894	0.119805	3.5692	8.8846
M103-1	44	41650	-17.2491	11.5012	148.3	4	0.197072	0.0140695	1.92404	1.5745	0.131092	2.91279	9.31742
M103-1	44	41650	-17.2491	11.5012	148.3	5	0.177986	0.0127069	1.75919	1.42067	0.118284	2.82097	9.30862
M103-1	44	41650	-17.2491	11.5012	148.3	6	0.188412	0.0134513	1.86296	1.50382	0.125206	2.99287	9.30816
M103-1	44	41650	-17.2491	11.5012	148.3	7	0.184716	0.0131874	1.85822	1.48615	0.123735	3.10058	9.38283
M103-1	44	41650	-17.2491	11.5012	148.3	8	0.171062	0.0122126	1.71635	1.39527	0.116169	2.67565	9.51222
M103-1	44	41650	-17.2491	11.5012	148.3	9	0.177025	0.0126383	1.90026	1.46489	0.121966	3.62804	9.65046
M103-1	45	41650	-17.2495	11.3997	247.6	0	0.0652736	0.00466007	1.80593	0.543066	0.0452152	10.5238	9.70269
M103-1	45	41650	-17.2495	11.3997	247.6	1	0.070689	0.00504669	1.90865	0.585189	0.0487223	11.0289	9.65431
M103-1	45	41650	-17.2495	11.3997	247.6	2	0.0551646	0.00393836	1.91184	0.537829	0.0447792	11.4501	11.37
M103-1	45	41650	-17.2495	11.3997	247.6	3	0.0557742	0.00398188	1.68686	0.515499	0.04292	9.76132	10.7788
M103-1	45	41650	-17.2495	11.3997	247.6	4	0.0660987	0.00471898	1.98015	0.573684	0.0477644	11.7206	10.1218
M103-1	45	41650	-17.2495	11.3997	247.6	5	0.0671128	0.00479137	2.23924	0.584527	0.0486672	13.7893	10.1572
M103-1	45	41650	-17.2495	11.3997	247.6	6	0.0528588	0.00377374	1.71575	0.524372	0.0436587	9.92812	11.5691
M103-1	45	41650	-17.2495	11.3997	247.6	7	0.0597529	0.00426593	1.75031	0.547825	0.0456115	10.0207	10.692
M103-1	45	41650	-17.2495	11.3997	247.6	8	0.058782	0.00419661	1.77999	0.514232	0.0428145	10.548	10.2022
M103-1	45	41650	-17.2495	11.3997	247.6	9	0.0625429	0.00446512	1.85777	0.547709	0.0456017	10.9172	10.2129
M103-1	46	41651	-17.2505	11.3007	478.6	0	0.218835	0.0156233	2.169	1.45194	0.120887	5.9755	7.73763
M103-1	46	41651	-17.2505	11.3007	478.6	1	0.133495	0.00953058	1.36168	1.13793	0.0947434	1.86452	9.94098
M103-1	46	41651	-17.2505	11.3007	478.6	2	0.15797	0.0112779	1.44712	1.2182	0.101426	1.90763	8.99333
M103-1	46	41651	-17.2505	11.3007	478.6	3	0.142724	0.0101895	1.37022	1.10389	0.0919087	2.21944	9.01998
M103-1	46	41651	-17.2505	11.3007	478.6	4	0.149054	0.0106414	1.38012	1.16137	0.0966947	1.82291	9.08666
M103-1	46	41651	-17.2505	11.3007	478.6	5	0.150373	0.0107355	1.41034	1.23933	0.103185	1.42514	9.61155
M103-1	46	41651	-17.2505	11.3007	478.6	6	0.14407	0.0102856	1.31289	1.12608	0.0937567	1.5567	9.11536
M103-1	46	41651	-17.2505	11.3007	478.6	7	0.137056	0.0097848	1.25693	1.1142	0.0927669	1.18944	9.48071
M103-1	46	41651	-17.2505	11.3007	478.6	8	0.109443	0.00781343	1.12254	0.977436	0.0813805	1.20923	10.4155
M103-1	46	41651	-17.2505	11.3007	478.6	9	0.111231	0.00794113	1.02295	0.864367	0.0719664	1.32151	9.06249
M103-1	47	41651	-17.25	11.1668	1020.3	0	0.311765	0.0222578	3.01461	2.26006	0.188171	6.28791	8.45414
M103-1	47	41651	-17.25	11.1668	1020.3	1	0.281376	0.0200883	2.746	2.02195	0.168346	6.03368	8.38031
M103-1	47	41651	-17.25	11.1668	1020.3	2	0.194934	0.0139169	2.09586	1.51826	0.126409	4.81338	9.08312
M103-1	47	41651	-17.25	11.1668	1020.3	3	0.212878	0.015198	2.19552	1.5992	0.133148	4.96931	8.7609
M103-1	47	41651	-17.25	11.1668	1020.3	4	0.223465	0.0159538	2.27973	1.64129	0.136653	5.32032	8.5655
M103-1	47	41651	-17.25	11.1668	1020.3	5	0.218912	0.0156288	2.23428	1.60469	0.133605	5.24656	8.54866
M103-1	47	41651	-17.25	11.1668	1020.3	6	0.215096	0.0153564	2.25575	1.592	0.132548	5.53131	8.63149
M103-1	47	41651	-17.25	11.1668	1020.3	7	0.240711	0.017185	2.4399	1.71498	0.142788	6.04093	8.30885
M103-1	47	41651	-17.25	11.1668	1020.3	8	0.224303	0.0160136	2.41041	1.68959	0.140674	6.00681	8.78463
M103-1	47	41651	-17.25	11.1668	1020.3	9	0.221795	0.0158346	2.45504	1.68357	0.140173	6.42889	8.85231
M103-1	48	41652	-17.2499	11	2126	0	0.40238	0.0287271	3.61637	2.95566	0.246086	5.50593	8.56633
M103-1	48	41652	-17.2499	11	2126	1	0.406126	0.0289945	3.59815	2.87945	0.23974	5.98916	8.26848
M103-1	48	41652	-17.2499	11	2126	2	0.428056	0.0305602	3.73671	2.97085	0.24735	6.38221	8.09386
M103-1	48	41652	-17.2499	11	2126	3	0.42195	0.0301242	3.90226	2.98218	0.248294	7.66736	8.24232
M103-1	48	41652	-17.2499	11	2126	4	0.413196	0.0294993	3.84314	3.03275	0.252504	6.75329	8.55966
M103-1	48	41652	-17.2499	11	2126	5	0.42275	0.0301813	3.91675	3.00358	0.250075	7.60981	8.28576
M103-1	48	41652	-17.2499	11	2126	6	0.430045	0.0307022	3.9919	3.14775	0.262079	7.0346	8.53617
M103-1	48	41652	-17.2499	11	2126	7	0.431644	0.0308163	3.96626	3.24805	0.27043	5.9851	8.77555
M103-1	48	41652	-17.2499	11	2126	8	0.435365	0.031082	3.87676	3.22195	0.268256	5.45675	8.63061
M103-1	48	41652	-17.2499	11	2126	9	0.432433	0.0308726	3.89257	3.20946	0.267217	5.69253	8.65547
M103-1	53	41653	-19.9995	11.8325	419.5	0	0.641428	0.0457934	12.5965	5.14515	0.42838	62.0947	9.35463
M103-1	53	41653	-19.9995	11.8325	419.5	1	0.595755	0.0425327	12.7055	4.97851	0.414506	64.3912	9.74559
M103-1	53	41653	-19.9995	11.8325	419.5	2	0.582227	0.0415669	12.6769	4.63908	0.386245	66.9822	9.29214
M103-1	53	41653	-19.9995	11.8325	419.5	3	0.596787	0.0426064	12.9794	4.8347	0.402533	67.8727	9.44772
M103-1	53	41653	-19.9995	11.8325	419.5	4	0.581996	0.0415504	12.5416	4.60889	0.383732	66.1063	9.23534
M103-1	53	41653	-19.9995	11.8325	419.5	5	0.583453	0.0416544	12.5515	4.26412	0.355026	69.0614	8.52314
M103-1	53	41653	-19.9995	11.8325	419.5	6	0.590857	0.042183	12.6349	4.77308	0.397403	65.5154	9.42092
M103-1	53	41653	-19.9995	11.8325	419.5	7	0.566602	0.0404513	12.5645	4.5513	0.378937	66.7765	9.36773
M103-1	53	41653	-19.9995	11.8325	419.5	8	0.572074	0.040842	12.5866	4.36534	0.363454	68.5107	8.89903
M103-1	53	41653	-19.9995	11.8325	419.5	9	0.563513	0.0402308	12.5073	4.63498	0.385904	65.6027	9.59225
M103-1	59	41654	-19.9992	12.3328	219.8	0	0.688135	0.049128	12.7198	5.504	0.458258	60.1315	9.32785
M103-1	59	41654	-19.9992	12.3328	219.8	1	0.603904	0.0431144	12.0795	4.39706	0.366096	64.02	8.49126
M103-1	59	41654	-19.9992	12.3328	219.8	2	0.544194	0.0388516	12.0275	4.41118	0.367271	63.4697	9.45318
M103-1	59	41654	-19.9992	12.3328	219.8	3	0.453917	0.0324064	11.6127	3.81927	0.317989	64.9449	9.81252
M103-1	59	41654	-19.9992	12.3328	219.8	4	0.423515	0.030236	11.5714	3.4298	0.285562	67.8466	9.44445
M103-1	59	41654	-19.9992	12.3328	219.8	5	0.328623	0.0234614	11.6215	2.72204	0.226635	74.1617	9.65991
M103-1	59	41654	-19.9992	12.3328	219.8	6	0.40939	0.0292275	11.7586	3.36465	0.280138	69.9499	9.58473
M103-1	59	41654	-19.9992	12.3328	219.8	7	0.347738	0.024826	11.6302	2.87561	0.239421	72.9551	9.64397
M103-1	59	41654	-19.9992	12.3328	219.8	8	0.353621	0.025246	11.7073	2.95809	0.246288	72.9104	9.75552
M103-1	59	41654	-19.9992	12.3328	219.8	9	1.2349	0.0881631	9.74585	2.66198	0.221634	59.0322	2.51391
M103-1	65	41654	-19.999	12.8498	102.9	0	1.43125	0.102181	11.1523	8.77395	0.730511	19.8193	7.14918
M103-1	65	41654	-19.999	12.8498	102.9	1	1.30761	0.0933542	10.3442	10.0898	0.840067	2.12037	8.99871
M103-1	65	41654	-19.999	12.8498	102.9	2	1.27664	0.0911428	10.1405	9.07989	0.755983	8.83811	8.29449
M103-1	65	41654	-19.999	12.8498	102.9	3	1.30065	0.092857	10.2432	9.20083	0.766053	8.68679	8.24981
M103-1	65	41654	-19.999	12.8498	102.9	4	1.18132	0.0843376	9.4523	9.07731	0.755769	3.12488	8.96122
M103-1	65	41654	-19.999	12.8498	102.9	5	1.24842	0.0891284	10.2229	8.60803	0.716696	13.4575	8.04117
M103-1	65	41654	-19.999	12.8498	102.9	6	1.2233	0.0873347	9.99407	9.3139	0.775467	5.6681	8.87925
M103-1	65	41654	-19.999	12.8498	102.9	7	1.17978	0.0842279	10.1748	9.08183	0.756145	9.10767	8.97738
M103-1	65	41654	-19.999	12.8498	102.9	8	1.15034	0.0821263	10.1593	8.92613	0.743182	10.2767	9.04925
M103-1	65	41654	-19.999	12.8498	102.9	9	1.20112	0.0857513	10.7248	9.29394	0.773805	11.9242	9.02383
M103-1	67	41655	-19.9999	12.999	33.8	0	0.501007	0.0357683	3.95808	3.66654	0.305273	2.42952	8.53473
M103-1	67	41655	-19.9999	12.999	33.8	1	0.997054	0.0711826	7.83324	7.13051	0.59368	5.85607	8.34024
M103-1	67	41655	-19.9999	12.999	33.8	2	0.862976	0.0616103	6.92649	6.31862	0.526082	5.06563	8.53886
M103-1	67	41655	-19.9999	12.999	33.8	3	0.307605	0.0219608	2.57097	0.681098	0.0567076	15.7489	2.58222
M103-1	67	41655	-19.9999	12.999	33.8	4	0.297065	0.0212084	2.50471	2.20675	0.183732	2.48297	8.6632
M103-1	67	41655	-19.9999	12.999	33.8	5	0.482907	0.0344762	3.97464	3.54325	0.295008	3.59492	8.55686
M103-1	67	41655	-19.9999	12.999	33.8	6	0.684083	0.0488387	5.50143	4.99879	0.416195	4.18866	8.52183
M103-1	67	41655	-19.9999	12.999	33.8	7	0.357661	0.0255345	2.91067	2.59226	0.215829	2.65346	8.45246
M103-1	67	41655	-19.9999	12.999	33.8	8	0.164615	0.0117523	1.35793	1.10811	0.0922603	2.08182	7.8504
M103-1	67	41655	-19.9999	12.999	33.8	9	0.164543	0.0117472	1.36676	1.13843	0.094785	1.90271	8.06872

## Sheet: MSM17-3
Cruise	Station	mm/dd/yyyy	Longitude [degrees_east]	Latitude [degrees_north]	Bot. Depth [m]	Sed. Depth [cm]	TN [%]	TN [%] / 14.007	TC [%]	OC [%]	OC [%] / 12.0107	CaCO3 [%]	C:N ratio	DI
MSM 17-3	224	01/30/2011	14.058	-23.063	135	0	0.821208	0.0586284	6.69162	6.36238	0.529726	2.74369	9.03531	0.821674
MSM 17-3	225	40574	14	-23.5	169	0	0.734992	0.0524732	5.75429	4.96816	0.413645	6.55103	7.88297	0.667667
MSM 17-3	226	40574	13.505	-23.512	228	0	0.618302	0.0441423	12.9521	5.35966	0.446241	63.2706	10.1091	0.180779
MSM 17-3	228	40575	14.005	-24.045	212	0	0.689927	0.0492559	10.7868	5.62952	0.468709	42.9773	9.5158	0.356648
MSM 17-3	229	40575	14.335	-24.512	120	0	0.755293	0.0539225	5.19728	4.68915	0.390414	4.23442	7.24028	0.872872
MSM 17-3	231	40576	14.5	-25	190	0	0.189997	0.0135644	1.40368	1.29319	0.10767	0.920741	7.93764	0.329438
MSM 17-3	233	40576	14.76	-26.667	180	0	0.270335	0.0193	1.68409	1.51568	0.126194	1.40348	6.53853	1.09731
MSM 17-3	234	40576	14.417	-26.667	325	0	0.495378	0.0353664	5.79008	4.00198	0.333201	14.9009	9.4214	0.11268
MSM 17-3	235	40577	14	-26.667	417	0	0.631079	0.0450545	10.8876	5.40842	0.4503	45.6596	9.99456	0.0220946
MSM 17-3	236	40577	13.5	-26.667	1100	0	0.493811	0.0352546	8.96248	4.01962	0.33467	41.1905	9.49295	0.00813516
MSM 17-3	237	40578	13.55	-26	750	0	0.97382	0.0695238	12.6106	7.91651	0.659122	39.1171	9.48052	0.11063
MSM 17-3	238	40578	13.333	-25	1080	0	0.753305	0.0537806	11.9241	6.47188	0.538843	45.4354	10.0193	0.17748
MSM 17-3	240	40579	13.108	-24	735	0	0.530085	0.0378443	11.6953	4.6777	0.389461	58.4803	10.2911	0.0749135
MSM 17-3	241	40579	11.75	-23	2970	0	0.0918431	0.00655694	9.712	0.745765	0.0620917	74.7186	9.46961	-0.530294
MSM 17-3	242	40580	12.5	-23	1640	0	0.27962	0.0199628	9.52893	2.62339	0.218421	57.5462	10.9414	-0.301596
MSM 17-3	243	40581	12.8	-23	905	0	0.445456	0.0318024	11.0968	3.83387	0.319204	60.5247	10.0371	0.00292288
MSM 17-3	246	40581	13.05	-23	410	0	0.277932	0.0198423	11.4063	2.60019	0.21649	73.3845	10.9105	0.0732899
MSM 17-3	250	40582	13.333	-23	350	0	0.348199	0.0248589	11.6807	3.12667	0.260323	71.2833	10.472	0.08267
MSM 17-3	254	40582	13.667	-23	155	0	0.447889	0.0319761	12.5823	3.62333	0.301675	74.658	9.43441	0.226528
MSM 17-3	264	40583	14.333	-23	66	0	0.825277	0.0589189	5.892	5.574	0.464086	2.65	7.8767	0.557702
MSM 17-3	266	40584	13.468	-22.765	250	0	0.676942	0.0483288	14.0192	6.18381	0.514858	65.2946	10.6532	0.202719
MSM 17-3	267	40585	13.18	-22.208	205	0	0.593656	0.0423828	13.7063	5.01989	0.417951	72.3869	9.86134	0.171728
MSM 17-3	268	40585	13.487	-21.028	23	0	0.0504147	0.00359925	0.397066	0.322457	0.0268475	0.62174	7.4592	0.252769
MSM 17-3	269	40585	13.333	-21	98	0	1.29784	0.0926567	9.87706	9.62505	0.801373	2.10008	8.64884	0.581381
MSM 17-3	272	40586	12.5	-21	425	0	0.525343	0.0375057	11.9444	4.76986	0.397134	59.7877	10.5886	0.0785181
MSM 17-3	274	40586	11.833	-20	408	0	0.599032	0.0427666	12.306	5.38273	0.448161	57.6938	10.4792	0.0609823
MSM 17-3	275	40587	12.167	-20	275	0	0.959034	0.0684682	12.4586	7.8969	0.657489	38.0145	9.60284	0.325757
MSM 17-3	276	40587	12.5	-20	153	0	0.893736	0.0638064	9.16619	6.82306	0.568082	19.5261	8.90321	0.598434
MSM 17-3	277	40587	12.833	-20	99	0	0.970941	0.0693183	7.67217	7.23679	0.602528	3.62818	8.6922	0.517569
MSM 17-3	278	40587	13	-20	30	0	0.471264	0.0336449	3.72678	3.56632	0.296929	1.33714	8.82537	0.0644977
MSM 17-3	279	40588	12.45	-19	35	0	0.214828	0.0153372	2.01497	1.58661	0.1321	3.5697	8.61303	0.0348301
MSM 17-3	292	40589	11.433	-19	416	0	0.334436	0.0238763	9.6244	2.91579	0.242766	55.9051	10.1676	0.0342362
MSM 17-3	295	40590	11	-19	1290	0	0.523041	0.0373414	6.76666	4.14662	0.345244	21.8337	9.24561	-0.0279717
MSM 17-3	298	40591	10.5	-19	2063	0	0.428467	0.0305895	8.17801	3.61813	0.301242	37.999	9.84789	-0.0937758
MSM 17-3	299	40591	11.417	-18.5	436	0	0.327379	0.0233725	5.29803	3.19268	0.265819	17.5446	11.3731	0.0621516
MSM 17-3	300	40592	11.5	-18	237	0	0.156669	0.0111851	3.79085	1.40026	0.116584	19.9216	10.4232	0.15817
MSM 17-3	304	40593	11.717	-17.25	35	0	0.364404	0.0260159	3.12207	2.65817	0.221317	3.86586	8.50699	0.156435
MSM 17-3	305	40593	11.507	-17.253	142	0	0.214342	0.0153025	2.05807	1.87543	0.156146	1.52206	10.204	0.136812
MSM 17-3	306	40593	11.288	-17.25	500	0	0.144634	0.0103259	1.38761	1.16593	0.097074	1.84734	9.40105	-0.102092
MSM 17-3	308	40594	11	-17.25	2103	0	0.383966	0.0274124	3.55931	3.04594	0.253602	4.27815	9.25135	-0.171788
MSM 17-3	309	40595	10.783	-17.25	2939	0	0.531053	0.0379134	4.45379	4.28687	0.356921	1.39103	9.41412	-0.149517
MSM 17-3	310	40596	10.5	-17.25	3247	0	0.528	0.0376954	4.637	3.758	0.312888	7.325	8.30041	-0.391286
MSM 17-3	311	40596	11.183	-17.25	922	0	0.137765	0.00983543	1.86093	1.1628	0.0968137	5.81772	9.84336	0.193272
MSM 17-3	316	40598	10	-17.25	3921	0	0.360663	0.0257488	5.06845	2.84422	0.236807	18.5353	9.19684	-0.381004
MSM 17-3	317	40600	8.053	-10.117	4825	0	0.145982	0.0104221	2.85186	1.07266	0.089309	14.8266	8.56923	-0.858113
													9.38163

## Sheet: Suspended Organic Matter
Cruise	Station	Date	Time [UTC]	Lat [Deg S]	Lon [Deg E]	Lat	Lon	Water Depth [m]	Bottle Depth [m]	Meter above bottom [m]	Konzentration [mg/L]	Mittelwert Ctot%	Mittelwert Corg%	Mittelwert N %	C/N
Traffic M-153	3	2019-02-17	17:45:00	28°58.343'	16°38.117'	-28.9724	16.3528	52	0	52	1.73	35.03	29.5572	5.402	6.3808
Traffic M-153	3	2019-02-17	17:45:00	28°58.343'	16°38.117'	-28.9724	16.3528	52	10	42	1.02	42.361	39.78	7.685	6.03652
Traffic M-153	3	2019-02-17	17:45:00	28°58.343'	16°38.117'	-28.9724	16.3528	52	20	32	1.4675	30.429	26.668	6.108	5.09163
Traffic M-153	3	2019-02-17	17:45:00	28°58.343'	16°38.117'	-28.9724	16.3528	52	30	22	1.64615	20.876	20.1604	3.628	6.48034
Traffic M-153	4	2019-02-17	22:30:00	29°29.426'	16°51.009'	-29.4904	16.8501	106	0	106	1.8575	38.702	35.0799	5.146	7.94976
Traffic M-153	4	2019-02-17	22:30:00	29°29.426'	16°51.009'	-29.4904	16.8501	106	10	96	1.18364	42.098	41.2923	7.21	6.67882
Traffic M-153	4	2019-02-17	22:30:00	29°29.426'	16°51.009'	-29.4904	16.8501	106	20	86	0.84	25.661	25.661	4.004	7.47388
Traffic M-153	4	2019-02-17	22:30:00	29°29.426'	16°51.009'	-29.4904	16.8501	106	30	76	0.587368	30.974	30.3502	4.369	8.10114
Traffic M-153	4	2019-02-17	22:30:00	29°29.426'	16°51.009'	-29.4904	16.8501	106	50	56	0.765556	25.2884	23.8809	4.2125	6.61114
Traffic M-153	4	2019-02-17	22:30:00	29°29.426'	16°51.009'	-29.4904	16.8501	106	75	31	2.05	16.8123	7.93643	2.7165	3.40707
Traffic M-153	4	2019-02-17	22:30:00	29°29.426'	16°51.009'	-29.4904	16.8501	106	100	6	2.80667	15.3394	7.94907	2.22	4.1757
Traffic M-153	5	2019-02-18	02:25:00	30°00.023'	17°00.004'	-30.0004	17.0001	128.4	0	128.4	1.65167	29.919	29.4602	4.929	6.97015
Traffic M-153	5	2019-02-18	02:25:00	30°00.023'	17°00.004'	-30.0004	17.0001	128.4	10	118.4	1.38167	27.271	27.236	4.7625	6.6692
Traffic M-153	5	2019-02-18	02:25:00	30°00.023'	17°00.004'	-30.0004	17.0001	128.4	20	108.4	0.814737	30.3781	27.8462	5.539	5.86274
Traffic M-153	5	2019-02-18	02:25:00	30°00.023'	17°00.004'	-30.0004	17.0001	128.4	30	98.4	0.661053	17.4304	13.8759	2.6535	6.09827
Traffic M-153	5	2019-02-18	02:25:00	30°00.023'	17°00.004'	-30.0004	17.0001	128.4	50	78.4	2.14133	19.2107	11.2815	3.5225	3.73491
Traffic M-153	5	2019-02-18	02:25:00	30°00.023'	17°00.004'	-30.0004	17.0001	128.4	75	53.4	1.49571	21.4616	9.47174	3.7215	2.96809
Traffic M-153	5	2019-02-18	02:25:00	30°00.023'	17°00.004'	-30.0004	17.0001	128.4	100	28.4	2.15667	14.3676	8.3872	2.302	4.24891
Traffic M-153	6	2019-02-18	07:15:00	30°27.817'	17°18.895'	-30.4636	17.3149	60	0	60	2.33	27.6065	27.4781	4.1645	7.69465
Traffic M-153	6	2019-02-18	07:15:00	30°27.817'	17°18.895'	-30.4636	17.3149	60	10	50	1.06421	27.913	22.9567	4.815	5.56006
Traffic M-153	6	2019-02-18	07:15:00	30°27.817'	17°18.895'	-30.4636	17.3149	60	20	40	1	19.6883	16.2293	3.4085	5.55269
Traffic M-153	6	2019-02-18	07:15:00	30°27.817'	17°18.895'	-30.4636	17.3149	60	30	30	0.862105	11.0471	10.4947	1.88	6.50996
Traffic M-153	6	2019-02-18	07:15:00	30°27.817'	17°18.895'	-30.4636	17.3149	60	50	10	0.962105	15.412	15.16	2.306	7.66665
Traffic M-153	7-1	2019-02-18	12:30:00	30°38.500'	17°01.356'	-30.6417	17.0023	169	0	169	1.292	36.0207	31.6791	5.7585	6.41549
Traffic M-153	7-1	2019-02-18	12:30:00	30°38.500'	17°01.356'	-30.6417	17.0023	169	10	159	1.09	31.0416	26.4372	5.2955	5.82203
Traffic M-153	7-1	2019-02-18	12:30:00	30°38.500'	17°01.356'	-30.6417	17.0023	169	20	149	0.791579	23.8366	19.744	4.083	5.63927
Traffic M-153	7-1	2019-02-18	12:30:00	30°38.500'	17°01.356'	-30.6417	17.0023	169	30	139	0.550526	15.142	12.663	2.483	5.94739
Traffic M-153	7-1	2019-02-18	12:30:00	30°38.500'	17°01.356'	-30.6417	17.0023	169	50	119	0.532632	14.6056	12.1514	1.9275	7.35185
Traffic M-153	7-1	2019-02-18	12:30:00	30°38.500'	17°01.356'	-30.6417	17.0023	169	75	94	0.444211	14.7102	13.3535	2.256	6.90274
Traffic M-153	7-1	2019-02-18	12:30:00	30°38.500'	17°01.356'	-30.6417	17.0023	169	100	69	0.636842	18.6084	15.3223	2.431	7.3503
Traffic M-153	7-1	2019-02-18	12:30:00	30°38.500'	17°01.356'	-30.6417	17.0023	169	125	44	0.584211	17.8861	15.4243	2.5365	7.09147
Traffic M-153	7-1	2019-02-18	12:30:00	30°38.500'	17°01.356'	-30.6417	17.0023	169	150	19	0.667368	21.6754	20.0815	3.12405	7.49626
Traffic M-153	7-2	2019-02-18	16:30:00	30°38.502'	17°01.352'	-30.6417	17.0023	169	0	169	1.19091	37.641	35.9122	5.437	7.7028
Traffic M-153	7-2	2019-02-18	16:30:00	30°38.502'	17°01.352'	-30.6417	17.0023	169	10	159	0.8	37.797	37.1629	6.249	6.9353
Traffic M-153	7-2	2019-02-18	16:30:00	30°38.502'	17°01.352'	-30.6417	17.0023	169	20	149	0.84	26.6036	16.5929	4.39529	4.40251
Traffic M-153	7-2	2019-02-18	16:30:00	30°38.502'	17°01.352'	-30.6417	17.0023	169	30	139	0.470526	26.8254	15.3517	3.01339	5.9411
Traffic M-153	7-2	2019-02-18	16:30:00	30°38.502'	17°01.352'	-30.6417	17.0023	169	50	119	0.516842	19.4024	8.67489	3.15619	3.20529
Traffic M-153	7-2	2019-02-18	16:30:00	30°38.502'	17°01.352'	-30.6417	17.0023	169	75	94	0.581333	26.5864	13.2756	3.69683	4.18783
Traffic M-153	7-2	2019-02-18	16:30:00	30°38.502'	17°01.352'	-30.6417	17.0023	169	100	69	0.795294	29.3727	10.2783	4.97416	2.40973
Traffic M-153	7-2	2019-02-18	16:30:00	30°38.502'	17°01.352'	-30.6417	17.0023	169	125	44	0.625882	24.2817	20.2197	4.07782	5.78245
Traffic M-153	7-2	2019-02-18	16:30:00	30°38.502'	17°01.352'	-30.6417	17.0023	169	150	19	0.6	21.0232	12.3836	3.2857	4.39525
Traffic M-153	7-3	2019-02-18	20:00:00	30°38.518'	17°01.165'	-30.6419	17.0194	169	0	169	1.63091	29.4369	29.3582	4.32607	7.9141
Traffic M-153	7-3	2019-02-18	20:00:00	30°38.518'	17°01.165'	-30.6419	17.0194	169	10	159	1.356	32.2	28.6023	5.908	5.64582
Traffic M-153	7-3	2019-02-18	20:00:00	30°38.518'	17°01.165'	-30.6419	17.0194	169	20	149	0.801053	26.251	25.5239	4.551	6.54042
Traffic M-153	7-3	2019-02-18	20:00:00	30°38.518'	17°01.165'	-30.6419	17.0194	169	30	139	0.572632	13.4151	11.864	1.76435	7.84172
Traffic M-153	7-3	2019-02-18	20:00:00	30°38.518'	17°01.165'	-30.6419	17.0194	169	50	119	0.604211	22.7979	11.942	3.22752	4.31494
Traffic M-153	7-3	2019-02-18	20:00:00	30°38.518'	17°01.165'	-30.6419	17.0194	169	75	94	0.493684	21.2839	11.1645	3.60811	3.6085
Traffic M-153	7-3	2019-02-18	20:00:00	30°38.518'	17°01.165'	-30.6419	17.0194	169	100	69	0.52	26.0954	19.3853	4.79667	4.71302
Traffic M-153	7-3	2019-02-18	20:00:00	30°38.518'	17°01.165'	-30.6419	17.0194	169	125	44	0.694737	42.5579	13.0898	3.3304	4.58356
Traffic M-153	7-3	2019-02-18	20:00:00	30°38.518'	17°01.165'	-30.6419	17.0194	169	150	19	0.553684	23.682	15.065	3.62497	4.84652
Traffic M-153	7-4	2019-02-19	02:30:00	30°38.531'	17°01.341'	-30.6422	17.0223	170	0	170	2.26625	27.932	27.8187	5.145	6.30547
Traffic M-153	7-4	2019-02-19	02:30:00	30°38.531'	17°01.341'	-30.6422	17.0223	170	10	160	1.5575	30.621	27.0607	5.5475	5.68863
Traffic M-153	7-4	2019-02-19	02:30:00	30°38.531'	17°01.341'	-30.6422	17.0223	170	20	150	0.602105	14.6987	13.864	2.30592	7.01148
Traffic M-153	7-4	2019-02-19	02:30:00	30°38.531'	17°01.341'	-30.6422	17.0223	170	30	140	0.441053	26.1101	15.9368	3.90193	4.76308
Traffic M-153	7-4	2019-02-19	02:30:00	30°38.531'	17°01.341'	-30.6422	17.0223	170	50	120	0.415789	20.6269	8.12067	3.14101	3.015
Traffic M-153	7-4	2019-02-19	02:30:00	30°38.531'	17°01.341'	-30.6422	17.0223	170	75	95	0.428421	20.0288	15.2908	2.92059	6.10557
Traffic M-153	7-4	2019-02-19	02:30:00	30°38.531'	17°01.341'	-30.6422	17.0223	170	100	70	0.515789	11.8239	7.53034	1.77051	4.96002
Traffic M-153	7-4	2019-02-19	02:30:00	30°38.531'	17°01.341'	-30.6422	17.0223	170	125	45	0.52	21.6581	8.03492	2.02417	4.62914
Traffic M-153	7-4	2019-02-19	02:30:00	30°38.531'	17°01.341'	-30.6422	17.0223	170	150	20	0.573684	14.6604	9.4084	1.9348	5.67082
Traffic M-153	7-5	2019-02-19	08:30:00	30°38.610'	17°01.329'	-30.6435	17.0022	170	0	170	2.74375	41.7581	27.8508	6.46913	5.02063
Traffic M-153	7-5	2019-02-19	08:30:00	30°38.610'	17°01.329'	-30.6435	17.0022	170	10	160	1.05667	36.5292	30.0467	5.93009	5.90883
Traffic M-153	7-5	2019-02-19	08:30:00	30°38.610'	17°01.329'	-30.6435	17.0022	170	20	150	0.8	31.258	31.215	6.0125	6.05445
Traffic M-153	7-5	2019-02-19	08:30:00	30°38.610'	17°01.329'	-30.6435	17.0022	170	30	140	0.815789	9.6537	2.63803	1.23002	2.5011
Traffic M-153	7-5	2019-02-19	08:30:00	30°38.610'	17°01.329'	-30.6435	17.0022	170	50	120	0.473684	17.9087	13.3248	2.14766	7.23537
Traffic M-153	7-5	2019-02-19	08:30:00	30°38.610'	17°01.329'	-30.6435	17.0022	170	75	95	0.581053	14.7904	7.79211	2.05287	4.42649
Traffic M-153	7-5	2019-02-19	08:30:00	30°38.610'	17°01.329'	-30.6435	17.0022	170	100	70	0.509474	21.5953	14.3318	2.23549	7.47642
Traffic M-153	7-5	2019-02-19	08:30:00	30°38.610'	17°01.329'	-30.6435	17.0022	170	125	45	0.533684	21.8179	11.2577	2.89354	4.53718
Traffic M-153	7-5	2019-02-19	08:30:00	30°38.610'	17°01.329'	-30.6435	17.0022	170	150	20	0.543158	13.4983	12.7406	2.2035	6.74282
Traffic M-153	8	2019-02-19	19:30:00	30°59.869'	15°59.841'	-30.9978	15.9974	320	0	320	0.48375	27.4381	26.4885	3.489	8.85365
Traffic M-153	8	2019-02-19	19:30:00	30°59.869'	15°59.841'	-30.9978	15.9974	320	10	310	0.497895	19.5	19.203	2.9745	7.52872
Traffic M-153	8	2019-02-19	19:30:00	30°59.869'	15°59.841'	-30.9978	15.9974	320	20	300	0.584211	18.4077	17.5585	2.9455	6.95175
Traffic M-153	8	2019-02-19	19:30:00	30°59.869'	15°59.841'	-30.9978	15.9974	320	30	290	0.572632	29.2	25.7325	4.6585	6.44172
Traffic M-153	8	2019-02-19	19:30:00	30°59.869'	15°59.841'	-30.9978	15.9974	320	50	270	0.707368	16.6642	15.017	2.5205	6.94804
Traffic M-153	8	2019-02-19	19:30:00	30°59.869'	15°59.841'	-30.9978	15.9974	320	75	245	0.502105	14.1264	12.989	2.26	6.70244
Traffic M-153	8	2019-02-19	19:30:00	30°59.869'	15°59.841'	-30.9978	15.9974	320	100	220	0.514737	7.77957	6.3685	1.2385	5.99663
Traffic M-153	8	2019-02-19	19:30:00	30°59.869'	15°59.841'	-30.9978	15.9974	320	125	195	0.357	9.13361	9.122	1.585	6.71161
Traffic M-153	8	2019-02-19	19:30:00	30°59.869'	15°59.841'	-30.9978	15.9974	320	150	170	1.04	4.02252	3.4145	0.6485	6.14021
Traffic M-153	8	2019-02-19	19:30:00	30°59.869'	15°59.841'	-30.9978	15.9974	320	300	20	0.537895	14.1087	12.2275	1.7565	8.11812
Traffic M-153	9	2019-02-20	04:00:00	30°59.990'	16°39.951'	-30.9998	16°39.955'	254	0	254	1.12667	27.8433	25.481	4.04	7.35531
Traffic M-153	9	2019-02-20	04:00:00	30°59.990'	16°39.951'	-30.9998	16°39.955'	254	10	244	0.825	35.3783	23.7505	5.4365	5.09471
Traffic M-153	9	2019-02-20	04:00:00	30°59.990'	16°39.951'	-30.9998	16°39.955'	254	20	234	0.655	25.5806	23.8545	4.603	6.04359
Traffic M-153	9	2019-02-20	04:00:00	30°59.990'	16°39.951'	-30.9998	16°39.955'	254	30	224	0.56	32.7314	19.1425	5.645	3.95458
Traffic M-153	9	2019-02-20	04:00:00	30°59.990'	16°39.951'	-30.9998	16°39.955'	254	50	204	0.529474	23.0354	12.527	3.46	4.22218
Traffic M-153	9	2019-02-20	04:00:00	30°59.990'	16°39.951'	-30.9998	16°39.955'	254	75	179	0.430526	13.4444	10.1655	1.896	6.25254
Traffic M-153	9	2019-02-20	04:00:00	30°59.990'	16°39.951'	-30.9998	16°39.955'	254	100	154	0.438947	11.7354	11.321	1.8845	7.00575
Traffic M-153	9	2019-02-20	04:00:00	30°59.990'	16°39.951'	-30.9998	16°39.955'	254	125	129	0.395789	10.9431	7.9265	1.411	6.55119
Traffic M-153	9	2019-02-20	04:00:00	30°59.990'	16°39.951'	-30.9998	16°39.955'	254	150	104	0.478947	9.12373	7.906	1.2145	7.59146
Traffic M-153	11	2019-02-20	12:30:00	30°59.928'	17°10.006'	-30.9988	17.1668	195	0	195	0.86125	34.0625	33.685	5.0435	7.7888
Traffic M-153	11	2019-02-20	12:30:00	30°59.928'	17°10.006'	-30.9988	17.1668	195	10	185	0.64	37.3752	33.9135	6.4735	6.10941
Traffic M-153	11	2019-02-20	12:30:00	30°59.928'	17°10.006'	-30.9988	17.1668	195	20	175	1.25778	37.9773	37.058	6.6765	6.4729
Traffic M-153	11	2019-02-20	12:30:00	30°59.928'	17°10.006'	-30.9988	17.1668	195	30	165	0.56	18.3161	17.144	3.101	6.44728
Traffic M-153	11	2019-02-20	12:30:00	30°59.928'	17°10.006'	-30.9988	17.1668	195	50	145	0.472632	20.9863	10.7525	3.136	3.99852
Traffic M-153	11	2019-02-20	12:30:00	30°59.928'	17°10.006'	-30.9988	17.1668	195	75	120	0.443158	13.8961	12.6775	2.5365	5.82861
Traffic M-153	11	2019-02-20	12:30:00	30°59.928'	17°10.006'	-30.9988	17.1668	195	100	95	0.449474	15.5747	9.636	2.1515	5.22302
Traffic M-153	11	2019-02-20	12:30:00	30°59.928'	17°10.006'	-30.9988	17.1668	195	125	70	0.448421	11.5124	11.3405	2.0515	6.44654
Traffic M-153	11	2019-02-20	12:30:00	30°59.928'	17°10.006'	-30.9988	17.1668	195	150	45	0.58	15.019	13.1255	2.1555	7.10123
Traffic M-153	12	2019-02-20	16:30:00	30°59.200'	17°37.420'	-30.9866	17.6237	57.1	0	57.1	1.12143	43.3396	40.3315	6.62	7.10481
Traffic M-153	12	2019-02-20	16:30:00	30°59.200'	17°37.420'	-30.9866	17.6237	57.1	10	47.1	1.09625	35.1077	32.4365	5.786	6.53765
Traffic M-153	12	2019-02-20	16:30:00	30°59.200'	17°37.420'	-30.9866	17.6237	57.1	20	37.1	1.03789	31.9405	29.826	6.264	5.55276
Traffic M-153	12	2019-02-20	16:30:00	30°59.200'	17°37.420'	-30.9866	17.6237	57.1	30	27.1	0.607368	10.173	8.4145	2.175	4.51165
Traffic M-153	12	2019-02-20	16:30:00	30°59.200'	17°37.420'	-30.9866	17.6237	57.1	50	7.1	0.922105	13.045	9.55	2.1245	5.24219
Traffic M-153	13	2019-02-20	23:50:00	31°59.452'	18°14.586	-31.9909	18.2431	58.7	0	58.7	1.855	33.5656	29.6075	3.982	8.67095
Traffic M-153	13	2019-02-20	23:50:00	31°59.452'	18°14.587	-31.9909	18.2431	58.7	10	48.7	1.02833	43.4254	38.9765	8.777	5.17872
Traffic M-153	13	2019-02-20	23:50:00	31°59.452'	18°14.588	-31.9909	18.2431	58.7	20	38.7	0.61625	41.282	36.3095	6.797	6.22973
Traffic M-153	13	2019-02-20	23:50:00	31°59.452'	18°14.589	-31.9909	18.2431	58.7	30	28.7	0.955	25.153	19.418	3.849	5.88332
Traffic M-153	13	2019-02-20	23:50:00	31°59.452'	18°14.590	-31.9909	18.2431	58.7	50	8.7	1.09895	15.298	14.5995	1.44	11.8234
Traffic M-153	14	2019-02-21	06:00:00	32°.00.008'	17°24.987'	-32.0001	17.4165	161.4	0	161.4	1.02167	35.5355	33.4485	4.9425	7.89216
Traffic M-153	14	2019-02-21	06:00:00	32°.00.008'	17°24.987'	-32.0001	17.4165	161.4	10	151.4	1.06	38.8545	35.1345	5.6775	7.21677
Traffic M-153	14	2019-02-21	06:00:00	32°.00.008'	17°24.987'	-32.0001	17.4165	161.4	20	141.4	0.588421	33.182	25.9665	3.3795	8.96039
Traffic M-153	14	2019-02-21	06:00:00	32°.00.008'	17°24.987'	-32.0001	17.4165	161.4	30	131.4	0.473684	22.463	22.032	3.045	8.43787
Traffic M-153	14	2019-02-21	06:00:00	32°.00.008'	17°24.987'	-32.0001	17.4165	161.4	50	111.4	0.5	19.526	11.7305	2.428	5.63422
Traffic M-153	14	2019-02-21	06:00:00	32°.00.008'	17°24.987'	-32.0001	17.4165	161.4	75	86.4	0.513684	13.531	9.805	1.841	6.21097
Traffic M-153	14	2019-02-21	06:00:00	32°.00.008'	17°24.987'	-32.0001	17.4165	161.4	100	61.4	0.503158	23.1515	14.396	3.48	4.82424
Traffic M-153	14	2019-02-21	06:00:00	32°.00.008'	17°24.987'	-32.0001	17.4165	161.4	125	36.4	0.704211	21.1135	16.145	2.5835	7.28778
Traffic M-153	14	2019-02-21	06:00:00	32°.00.008'	17°24.987'	-32.0001	17.4165	161.4	150	11.4	0.647368	19.4215	15.038	2.4375	7.19468
Traffic M-153	15	2019-02-21	13:45:00	31°59.875	16°24.891	-31.9979	16.4149	402.1	0	402.1	0.673846	20.9875	20.9465	2.23	10.954
Traffic M-153	15	2019-02-21	13:45:00	31°59.876	16°24.892	-31.9979	16.4149	402.1	10	392.1	0.621053	23.092	18.061	2.7975	7.52901
Traffic M-153	15	2019-02-21	13:45:00	31°59.877	16°24.893	-31.9979	16.4149	402.1	20	382.1	0.548421	22.222	20.292	2.8135	8.41093
Traffic M-153	15	2019-02-21	13:45:00	31°59.878	16°24.894	-31.9979	16.4149	402.1	30	372.1	0.0326667
Traffic M-153	15	2019-02-21	13:45:00	31°59.879	16°24.895	-31.9979	16.4149	402.1	50	352.1	0.507368	11.761	11.627	1.677	8.08538
Traffic M-153	15	2019-02-21	13:45:00	31°59.880	16°24.896	-31.9979	16.4149	402.1	75	327.1	0.445263	10.3725	7.5905	1.041	8.50326
Traffic M-153	15	2019-02-21	13:45:00	31°59.881	16°24.897	-31.9979	16.4149	402.1	100	302.1	0.838947	6.37303	4.9535	0.8625	6.6976
Traffic M-153	15	2019-02-21	13:45:00	31°59.882	16°24.898	-31.9979	16.4149	402.1	125	277.1	0.595789	7.56524	6.664	0.956	8.12911
Traffic M-153	15	2019-02-21	13:45:00	31°59.883	16°24.899	-31.9979	16.4149	402.1	150	252.1	1.08	5.40952	4.9095	0.6125	9.34754
Traffic M-153	15	2019-02-21	13:45:00	31°59.884	16°24.900	-31.9979	16.4149	402.1	300	102.1	0.468421	12.6946	9.796	1.022	11.178
Traffic M-153	16	2019-02-21	21:00:00	31°59.901	15°59.851	-31.9985	15.9975	840	0	840	1.28444	29.2061	27.0225	3.9455	7.98711
Traffic M-153	16	2019-02-21	21:00:00	31°59.901	15°59.851	-31.9985	15.9975	840	20	820	0.885714	24.4983	23.784	3.248	8.53955
Traffic M-153	16	2019-02-21	21:00:00	31°59.901	15°59.851	-31.9985	15.9975	840	60	780	0.62	21.7601	19.097	2.9145	7.6413
Traffic M-153	16	2019-02-21	21:00:00	31°59.901	15°59.851	-31.9985	15.9975	840	150	690	0.352105	20.7466	16.7985	2.27815	8.59911
Traffic M-153	16	2019-02-21	21:00:00	31°59.901	15°59.851	-31.9985	15.9975	840	300	540	0.335263	41.2106	18.2225	2.8885	7.35701
Traffic M-153	16	2019-02-21	21:00:00	31°59.901	15°59.851	-31.9985	15.9975	840	500	340	0.283784	15.1715	12.889	1.7545	8.56706
Traffic M-153	20	2019-02-26	10:15:00	30°23.204'	17°16.692'	-30.3867	17.2782	56.4	0	56.4	1.53	37.9375	30.119	5.6565	6.20953
Traffic M-153	20	2019-02-26	10:15:00	30°23.204'	17°16.692'	-30.3867	17.2782	56.4	10	46.4	1.36842	22.191	24.2795	3.6645	7.72665
Traffic M-153	20	2019-02-26	10:15:00	30°23.204'	17°16.692'	-30.3867	17.2782	56.4	20	36.4	1.42222	24.6335	21.921	4.434	5.76542
Traffic M-153	20	2019-02-26	10:15:00	30°23.204'	17°16.692'	-30.3867	17.2782	56.4	30	26.4	1.32632	17.6345	16.657	3.3645	5.77354
Traffic M-153	20	2019-02-26	10:15:00	30°23.204'	17°16.692'	-30.3867	17.2782	56.4	50	6.4	1.28444	11.7525	10.318	1.5855	7.58919
Traffic M-153	22	2019-02-26	18:10:00	29°59.832'	16°24.890'	-29.9972	16.4148	191.3	0	191.3	0.871765	36.808	36.2215	4.9805	8.48124
Traffic M-153	22	2019-02-26	18:10:00	29°59.832'	16°24.890'	-29.9972	16.4148	191.3	10	181.3	0.885333	41.064	34.631	6.2575	6.45402
Traffic M-153	22	2019-02-26	18:10:00	29°59.832'	16°24.890'	-29.9972	16.4148	191.3	20	171.3	1.63667	38.5505	35.3435	6.5195	6.3221
Traffic M-153	22	2019-02-26	18:10:00	29°59.832'	16°24.890'	-29.9972	16.4148	191.3	30	161.3	0.821053	22.742	18.578	3.349	6.46919
Traffic M-153	22	2019-02-26	18:10:00	29°59.832'	16°24.890'	-29.9972	16.4148	191.3	50	141.3	0.537895	14.8395	12.8665	1.6795	8.93401
Traffic M-153	22	2019-02-26	18:10:00	29°59.832'	16°24.890'	-29.9972	16.4148	191.3	75	116.3	0.501053	17.2285	15.467	2.394	7.53439
Traffic M-153	22	2019-02-26	18:10:00	29°59.832'	16°24.890'	-29.9972	16.4148	191.3	100	91.3	0.609474	10.583	10.58	1.438	8.58011
Traffic M-153	22	2019-02-26	18:10:00	29°59.832'	16°24.890'	-29.9972	16.4148	191.3	125	66.3	0.546316	13.0765	11.6775	1.6765	8.12292
Traffic M-153	22	2019-02-26	18:10:00	29°59.832'	16°24.890'	-29.9972	16.4148	191.3	150	41.3	0.566316	15.357	12.284	1.7565	8.15563
Traffic M-153	23	2019-02-27	03:45:00	29°59.935'	15°35.011'	-29.9989	15.5835	207,4	0	207.4	0.446875	27.7145	27.141	4.0135	7.88621
Traffic M-153	23	2019-02-27	03:45:00	29°59.935'	15°35.011'	-29.9989	15.5835	207,4	10	197.4	0.784211	13.996	13.5965	1.819	8.71687
Traffic M-153	23	2019-02-27	03:45:00	29°59.935'	15°35.011'	-29.9989	15.5835	207,4	20	187.4	0.747778	33.5745	26.1815	4.8895	6.24448
Traffic M-153	23	2019-02-27	03:45:00	29°59.935'	15°35.011'	-29.9989	15.5835	207,4	30	177.4	0.741053	20.395	18.744	3.2865	6.65112
Traffic M-153	23	2019-02-27	03:45:00	29°59.935'	15°35.011'	-29.9989	15.5835	207,4	50	157.4	0.472632	15.36	12.3575	2.0455	7.04526
Traffic M-153	23	2019-02-27	03:45:00	29°59.935'	15°35.011'	-29.9989	15.5835	207,4	75	132.4	0.537895	9.232	9.0525	1.488	7.09466
Traffic M-153	23	2019-02-27	03:45:00	29°59.935'	15°35.011'	-29.9989	15.5835	207,4	100	107.4	0.443333	8.08387	7.572	1.10421	7.99696
Traffic M-153	23	2019-02-27	03:45:00	29°59.935'	15°35.011'	-29.9989	15.5835	207,4	125	82.4	0.493684	8.55287	8.261	0.873882	11.0242
Traffic M-153	23	2019-02-27	03:45:00	29°59.935'	15°35.011'	-29.9989	15.5835	207,4	150	57.4	0.438947	10.7036	9.936	0.91898	12.6087
Traffic M-153	24	2019-02-27	12:15:00	30°02.392'	14°41.739'	-30.0399	14.6957	1027	0	1027	0.462424	20.5962	20.15	2.54631	9.22847
Traffic M-153	24	2019-02-27	12:15:00	30°02.392'	14°41.739'	-30.0399	14.6957	1027	10	1017	1.5503	6.283	6.2681	0.788601	9.26925
Traffic M-153	24	2019-02-27	12:15:00	30°02.392'	14°41.739'	-30.0399	14.6957	1027	20	1007	1.36167	7.24044	6.986	0.98413	8.27832
Traffic M-153	24	2019-02-27	12:15:00	30°02.392'	14°41.739'	-30.0399	14.6957	1027	50	977	0.434444	27.2114	26.9445	3.95533	7.94426
Traffic M-153	24	2019-02-27	12:15:00	30°02.392'	14°41.739'	-30.0399	14.6957	1027	150	877	0.190714	30.8488	22.8405	4.22754	6.30063
Traffic M-153	24	2019-02-27	12:15:00	30°02.392'	14°41.739'	-30.0399	14.6957	1027	300	727	0.207719	17.7903	14.2385	2.3092	7.19066
Traffic M-153	24	2019-02-27	12:15:00	30°02.392'	14°41.739'	-30.0399	14.6957	1027	500	527	0.257586	19.0011	15.7485	1.81057	10.1436
Traffic M-153	29	2019-03-02	12:15:00	22°59.997'	14°15.003'	-22.9999	14.25	101.8	0	101.8	2.988	43.2965	38.8005	6.3515	7.12405
Traffic M-153	29	2019-03-02	12:15:00	22°59.997'	14°15.003'	-22.9999	14.25	101.8	10	91.8	1.2	41.6675	33.748	6.453	6.09891
Traffic M-153	29	2019-03-02	12:15:00	22°59.997'	14°15.003'	-22.9999	14.25	101.8	20	81.8	1.13818	35.483	35.164	5.809	7.05932
Traffic M-153	29	2019-03-02	12:15:00	22°59.997'	14°15.003'	-22.9999	14.25	101.8	30	71.8	0.57	41.7185	29.95	7.1685	4.87231
Traffic M-153	29	2019-03-02	12:15:00	22°59.997'	14°15.003'	-22.9999	14.25	101.8	50	51.8	0.637778	16.094	16.4575	2.399	8.00018
Traffic M-153	29	2019-03-02	12:15:00	22°59.997'	14°15.003'	-22.9999	14.25	101.8	75	26.8	0.845714	11.888	11.3425	1.9055	6.9417
Traffic M-153	29	2019-03-02	12:15:00	22°59.997'	14°15.003'	-22.9999	14.25	101.8	100	1.8	0.872632	13.949	14.0725	2.102	7.80737
Traffic M-153	31	2019-03-02	20:00:00	23°00.058'	14°00.064'	-23.001	14.0011	137	0	137	1.6125	38.994	38.326	5.458	8.18891
Traffic M-153	31	2019-03-02	20:00:00	23°00.058'	14°00.064'	-23.001	14.0011	137	10	127	1.13	38.03	34.0515	5.884	6.74885
Traffic M-153	31	2019-03-02	20:00:00	23°00.058'	14°00.064'	-23.001	14.0011	137	20	117	0.642222	24.789	22.678	4.3435	6.08879
Traffic M-153	31	2019-03-02	20:00:00	23°00.058'	14°00.064'	-23.001	14.0011	137	30	107	0.641111	37.422	10.119	5.0965	2.31543
Traffic M-153	31	2019-03-02	20:00:00	23°00.058'	14°00.064'	-23.001	14.0011	137	50	87	0.487778	9.04	9.0815	1.359	7.79299
Traffic M-153	31	2019-03-02	20:00:00	23°00.058'	14°00.064'	-23.001	14.0011	137	75	62	0.523158	10.395	11.113	1.624	7.98015
Traffic M-153	31	2019-03-02	20:00:00	23°00.058'	14°00.064'	-23.001	14.0011	137	100	37	0.575789	18.027	18.0725	2.187	9.63686
Traffic M-154	31	2019-03-03	20:00:00	23°00.058'	14°00.064'	-23.001	14.0011	137	125	12	0.926667	14.7125	10.738	1.927	6.49842
Traffic M-153	32	2019-03-03	03:00:00	22°59.994'	13°32.066'	-22.9999	13.5344	200	0	200	1.18909	32.927	30.1905	5.6415	6.24082
Traffic M-153	32	2019-03-03	03:00:00	22°59.994'	13°32.066'	-22.9999	13.5344	200	10	190	1.13846	24.4745	22.596	4.2095	6.25989
Traffic M-153	32	2019-03-03	03:00:00	22°59.994'	13°32.066'	-22.9999	13.5344	200	20	180	0.534737	45.885	44.1965	9.055	5.69201
Traffic M-153	32	2019-03-03	03:00:00	22°59.994'	13°32.066'	-22.9999	13.5344	200	30	170	0.543158	21.545	19.8515	3.356	6.89822
Traffic M-153	32	2019-03-03	03:00:00	22°59.994'	13°32.066'	-22.9999	13.5344	200	50	150	0.484211	14.254	12.898	1.755	8.5706
Traffic M-153	32	2019-03-03	03:00:00	22°59.994'	13°32.066'	-22.9999	13.5344	200	75	125	0.548889	11.031	8.7805	1.748	5.85792
Traffic M-153	32	2019-03-03	03:00:00	22°59.994'	13°32.066'	-22.9999	13.5344	200	100	100	0.5	13.2465	7.168	2.044	4.08962
Traffic M-153	32	2019-03-03	03:00:00	22°59.994'	13°32.066'	-22.9999	13.5344	200	125	75	0.686316	9.415	7.2675	1.3795	6.14369
Traffic M-153	32	2019-03-03	03:00:00	22°59.994'	13°32.066'	-22.9999	13.5344	200	150	50	0.786316	20.6325	12.401	2.2325	6.47785
Traffic M-153	33	2019-03-03	08:00:00	22°59.942'	13°05.109'	-22.999	13.0852	350	0	350	1.03	43.029	35.2415	6.8315	6.01595
Traffic M-153	33	2019-03-03	08:00:00	22°59.942'	13°05.109'	-22.999	13.0852	350	10	340	0.915	24.369	22.887	4.1935	6.3647
Traffic M-153	33	2019-03-03	08:00:00	22°59.942'	13°05.109'	-22.999	13.0852	350	20	330	0.847143	29.935	27.196	4.864	6.52045
Traffic M-153	33	2019-03-03	08:00:00	22°59.942'	13°05.109'	-22.999	13.0852	350	30	320	1.02667	29.594	25.4105	4.942	5.9962
Traffic M-153	33	2019-03-03	08:00:00	22°59.942'	13°05.109'	-22.999	13.0852	350	50	300	0.532632	15.906	12.6315	2.596	5.67435
Traffic M-153	33	2019-03-03	08:00:00	22°59.942'	13°05.109'	-22.999	13.0852	350	75	275	0.466316	8.961	8.4935	1.438	6.88801
Traffic M-153	33	2019-03-03	08:00:00	22°59.942'	13°05.109'	-22.999	13.0852	350	100	250	0.473684	9.9685	7.5145	1.537	5.70154
Traffic M-153	33	2019-03-03	08:00:00	22°59.942'	13°05.109'	-22.999	13.0852	350	125	225	0.466316	10.9745	8.079	1.5085	6.24566
Traffic M-153	33	2019-03-03	08:00:00	22°59.942'	13°05.109'	-22.999	13.0852	350	150	200	0.473684	9.0445	7.3385	1.3285	6.44187
Traffic M-153	33	2019-03-03	08:00:00	22°59.942'	13°05.109'	-22.999	13.0852	350	300	50	0.742105	10.646	8.0565	1.17	8.0302
Traffic M-153	39_1	2019-03-07	04:50:00	21°00.094'	12°00.483'	-21.0016	12.0081	1000	0	1000	0.409615	41.058	39.621	5.921	7.80362
Traffic M-153	39_1	2019-03-07	04:50:00	21°00.094'	12°00.483'	-21.0016	12.0081	1000	17	983	0.404	33.8475	33.5659	5.5985	6.99185
Traffic M-153	39_1	2019-03-07	04:50:00	21°00.094'	12°00.483'	-21.0016	12.0081	1000	33	967	0.305789	21.881	21.8688	3.3965	7.50859
Traffic M-153	39_1	2019-03-07	04:50:00	21°00.094'	12°00.483'	-21.0016	12.0081	1000	150	850	0.176552	17.864	16.3967	2.172	8.80364
Traffic M-153	39_1	2019-03-07	04:50:00	21°00.094'	12°00.483'	-21.0016	12.0081	1000	300	700	0.198966	16.8015	14.7321	1.951	8.80587
Traffic M-153	39_1	2019-03-07	04:50:00	21°00.094'	12°00.483'	-21.0016	12.0081	1000	500	500	0.186207	11.712	11.6467	1.2045	11.2762
Traffic M-153	39_2	2019-03-07	08:45:00	21°00.135'	12°00.634'	-21.0023	12.0106	1000	0	1000	0.482778	43.7825	37.2068	6.7755	6.40393
Traffic M-153	39_2	2019-03-07	08:45:00	21°00.135'	12°00.634'	-21.0023	12.0106	1000	15	985	0.464	41.512	34.0385	7.039	5.63931
Traffic M-153	39_2	2019-03-07	08:45:00	21°00.135'	12°00.634'	-21.0023	12.0106	1000	25	975	0.339222	29.209	28.7717	4.801	6.98875
Traffic M-153	39_2	2019-03-07	08:45:00	21°00.135'	12°00.634'	-21.0023	12.0106	1000	150	850	0.270246	16.532	13.4919	1.9415	8.10407
Traffic M-153	39_2	2019-03-07	08:45:00	21°00.135'	12°00.634'	-21.0023	12.0106	1000	300	700	0.189286	21.5205	18.5701	2.569	8.42979
Traffic M-153	39_2	2019-03-07	08:45:00	21°00.135'	12°00.634'	-21.0023	12.0106	1000	500	500	0.155862	13.5185	10.5199	2.0575	5.9626
Traffic M-153	39_3	2019-03-07	14:45:00	21°00.045'	12°00.885'	-21.0008	12.0147	1000	0	1000	0.473333	35.48	34.2153	5.159	7.73429
Traffic M-153	39_3	2019-03-07	14:45:00	21°00.045'	12°00.885'	-21.0008	12.0147	1000	17	983	0.442222	40.1405	36.5273	6.311	6.74972
Traffic M-153	39_3	2019-03-07	14:45:00	21°00.045'	12°00.885'	-21.0008	12.0147	1000	45	955	0.263053	20.882	20.604	2.7055	8.88117
Traffic M-153	39_3	2019-03-07	15:55:00	21°00.045'	12°00.885'	-21.0008	12.0147	1000	150	850	0.170483	18.781	18.1407	2.6595	7.95465
Traffic M-153	39_3	2019-03-07	14:45:00	21°00.045'	12°00.885'	-21.0008	12.0147	1000	300	700	0.223	18.5565	17.27	2.957	6.81094
Traffic M-153	39_3	2019-03-07	14:45:00	21°00.045'	12°00.885'	-21.0008	12.0147	1000	500	500	0.129966	16.817	15.5015	1.8995	9.51702
Traffic M-153	39_4	2019-03-07	20:45:00	21°00.020'	11°59.920'	-21.0003	11.9999	1000	0	1000	0.4607	43.448	39.9016	6.538	7.11723
Traffic M-153	39_4	2019-03-07	20:45:00	21°00.020'	11°59.920'	-21.0003	11.9999	1000	10	990	0.474625	38.8835	32.121	6.7	5.59088
Traffic M-153	39_4	2019-03-07	20:45:00	21°00.020'	11°59.920'	-21.0003	11.9999	1000	20	980	0.331462	38.6975	25.4382	4.628	6.41
Traffic M-153	39_4	2019-03-07	20:45:00	21°00.020'	11°59.920'	-21.0003	11.9999	1000	150	850	0.212483	15.8665	13.6045	2.3935	6.62851
Traffic M-153	39_4	2019-03-07	20:45:00	21°00.020'	11°59.920'	-21.0003	11.9999	1000	300	700	0.923793	2.555	2.08275	0.2965	8.1918
Traffic M-153	39_4	2019-03-07	20:45:00	21°00.020'	11°59.920'	-21.0003	11.9999	1000	500	500	0.16331	19.2605	17.1602	2.0785	9.62807
Traffic M-153	39_5	2019-03-08	02:15:00	20°59.973'	11°59.990'	-20.9995	11.9998	1000	0	1000	0.705556	36.041	32.7415	4.9	7.79235
Traffic M-153	39_5	2019-03-08	02:15:00	20°59.973'	11°59.990'	-20.9995	11.9998	1000	20	980	0.484	34.1505	27.2295	5.552	5.71948
Traffic M-153	39_5	2019-03-08	02:15:00	20°59.973'	11°59.990'	-20.9995	11.9998	1000	37	963	0.54125	34.5555	33.4705	5.6055	6.96328
Traffic M-153	39_5	2019-03-08	02:15:00	20°59.973'	11°59.990'	-20.9995	11.9998	1000	150	850	0.177586	19.995	15.5135	2.26	8.00511
Traffic M-153	39_5	2019-03-08	02:15:00	20°59.973'	11°59.990'	-20.9995	11.9998	1000	300	700	0.138138	21.035	13.54	1.975	7.99498
Traffic M-153	39_5	2019-03-08	02:15:00	20°59.973'	11°59.990'	-20.9995	11.9998	1000	500	500	0.15931	31.7485	13.868	3.588	4.50741
Traffic M-153	40	2019-03-08	11:45:00	21°00.000'	12°30.025'	-21	12.5004	430	0	430	0.862857	37.934	32.7315	5.983	6.37989
Traffic M-153	40	2019-03-08	11:45:00	21°00.000'	12°30.025'	-21	12.5004	430	10	420	0.728333	41.2935	40.3455	6.9725	6.74796
Traffic M-153	40	2019-03-08	11:45:00	21°00.000'	12°30.025'	-21	12.5004	430	20	410	0.549474	32.028	28.656	4.31	7.75362
Traffic M-153	40	2019-03-08	11:45:00	21°00.000'	12°30.025'	-21	12.5004	430	30	400	0.466842	20.7145	17.6325	2.986	6.88637
Traffic M-153	40	2019-03-08	11:45:00	21°00.000'	12°30.025'	-21	12.5004	430	50	380	0.387	14.751	12.087	1.773	7.95016
Traffic M-153	40	2019-03-08	11:45:00	21°00.000'	12°30.025'	-21	12.5004	430	75	355	0.388421	12.148	7.8345	1.3015	7.01993
Traffic M-153	40	2019-03-08	11:45:00	21°00.000'	12°30.025'	-21	12.5004	430	100	330	0.390526	11.855	8.6795	1.1175	9.0576
Traffic M-153	40	2019-03-08	11:45:00	21°00.000'	12°30.025'	-21	12.5004	430	125	305	0.409474	9.137	8.379	1.094	8.93184
Traffic M-153	40	2019-03-08	11:45:00	21°00.000'	12°30.025'	-21	12.5004	430	150	280	0.37	10.645	10.63	0.985	12.5853
Traffic M-153	40	2019-03-08	11:45:00	21°00.000'	12°30.025'	-21	12.5004	430	300	130	0.392632	12.371	7.966	1.185	7.83949
Traffic M-153	41	2019-03-08	17:00:00	20°59.990'	12°59.996'	-20.9998	12.9999	170	0	170	1.2025	34.927	32.1195	4.6165	8.11376
Traffic M-153	41	2019-03-08	17:00:00	20°59.990'	12°59.996'	-20.9998	12.9999	170	10	160	0.906	25.74	25.408	3.502	8.46097
Traffic M-153	41	2019-03-08	17:00:00	20°59.990'	12°59.996'	-20.9998	12.9999	170	20	150	0.4725	35.9275	31.229	5.6895	6.40103
Traffic M-153	41	2019-03-08	17:00:00	20°59.990'	12°59.996'	-20.9998	12.9999	170	30	140	0.494737	19.117	18.3525	2.046	10.4606
Traffic M-153	41	2019-03-08	17:00:00	20°59.990'	12°59.996'	-20.9998	12.9999	170	50	120	0.421053	15.2775	12.3675	1.956	7.37359
Traffic M-153	41	2019-03-08	17:00:00	20°59.990'	12°59.996'	-20.9998	12.9999	170	75	95	0.454737	14.966	12.8665	2.0215	7.42254
Traffic M-153	41	2019-03-08	17:00:00	20°59.990'	12°59.996'	-20.9998	12.9999	170	100	70	0.486316	10.8145	9.5825	1.03	10.8494
Traffic M-153	41	2019-03-08	17:00:00	20°59.990'	12°59.996'	-20.9998	12.9999	170	125	45	0.483529	16.301	14.13	2.342	7.03593
Traffic M-153	41	2019-03-08	17:00:00	20°59.990'	12°59.996'	-20.9998	12.9999	170	150	20	0.424526	18.642	13.6125	2.378	6.67563
Traffic M-153	42	2019-03-08	21:00:00	20°59.943'	13°22.901'	-20.9991	13.3817	76	0	76	1.181	37.4885	34.674	6.179	6.54413
Traffic M-153	42	2019-03-08	21:00:00	20°59.943'	13°22.901'	-20.9991	13.3817	76	10	66	1.00929	39.3935	35.947	6.8615	6.10955
Traffic M-153	42	2019-03-08	21:00:00	20°59.943'	13°22.901'	-20.9991	13.3817	76	20	56	0.988429	39.36	37.587	6.363	6.88877
Traffic M-153	42	2019-03-08	21:00:00	20°59.943'	13°22.901'	-20.9991	13.3817	76	30	46	0.813333	31.959	31.041	5.107	7.0882
Traffic M-153	42	2019-03-08	21:00:00	20°59.943'	13°22.901'	-20.9991	13.3817	76	50	26	0.5827	29.3755	24.617	4.843	5.92771
Traffic M-153	42	2019-03-08	21:00:00	20°59.943'	13°22.901'	-20.9991	13.3817	76	70	6	1.05017	23.977	23.6395	3.3625	8.19864
Traffic M-153	43	2019-03-09	04:55:00	20°00.000'	12°54.999'	-20	12.9167	76	0	76	0.7049	38.1605	34.533	6.4335	6.25969
Traffic M-153	43	2019-03-09	04:55:00	20°00.000'	12°54.999'	-20	12.9167	76	10	66	0.594444	34.6315	32.9595	5.7055	6.73679
Traffic M-153	43	2019-03-09	04:55:00	20°00.000'	12°54.999'	-20	12.9167	76	20	56	0.538111	38.7315	38.759	7.343	6.15552
Traffic M-153	43	2019-03-09	04:55:00	20°00.000'	12°54.999'	-20	12.9167	76	30	46	0.521111	24.5055	23.962	4.422	6.31932
Traffic M-153	43	2019-03-09	04:55:00	20°00.000'	12°54.999'	-20	12.9167	76	50	26	0.665263	27.3435	24.2695	5.0715	5.58072
Traffic M-153	43	2019-03-09	04:55:00	20°00.000'	12°54.999'	-20	12.9167	76	70	6	0.689474	24.243	19.1485	3.805	5.86876
Traffic M-153	44	2019-03-09	09:10:00	20°00.072'	12°29.946'	-20.0012	12.4991	153.4	0	153.4	0.46129	39.4845	34.019	5.302	7.48252
Traffic M-153	44	2019-03-09	09:10:00	20°00.072'	12°29.946'	-20.0012	12.4991	153.4	10	143.4	0.573684	27.948	24.1035	4.602	6.10801
Traffic M-153	44	2019-03-09	09:10:00	20°00.072'	12°29.946'	-20.0012	12.4991	153.4	20	133.4	0.696842	18.32	17.37	3.1225	6.48729
Traffic M-153	44	2019-03-09	09:10:00	20°00.072'	12°29.946'	-20.0012	12.4991	153.4	30	123.4	0.424211	18.767	13.1395	2.7315	5.60975
Traffic M-153	44	2019-03-09	09:10:00	20°00.072'	12°29.946'	-20.0012	12.4991	153.4	50	103.4	0.387778	13.667	12.01	1.6945	8.26547
Traffic M-153	44	2019-03-09	09:10:00	20°00.072'	12°29.946'	-20.0012	12.4991	153.4	75	78.4	0.398947	12.798	10.602	1.516	8.15557
Traffic M-153	44	2019-03-09	09:10:00	20°00.072'	12°29.946'	-20.0012	12.4991	153.4	100	53.4	0.517895	14.763	12.748	1.657	8.97192
Traffic M-153	44	2019-03-09	09:10:00	20°00.072'	12°29.946'	-20.0012	12.4991	153.4	125	28.4	0.528421	17.18	16.844	2.379	8.25689
Traffic M-153	44	2019-03-09	09:10:00	20°00.072'	12°29.946'	-20.0012	12.4991	153.4	150	3.4	0.538947	20.456	18.9885	2.9965	7.38996
Traffic M-153	45	2019-03-09	15:45:00	19°59.981'	11°49.980'	-19.9997	11.833	408.5	0	408.5	0.453333	45.9735	41.895	5.9595	8.1982
Traffic M-153	45	2019-03-09	15:45:00	19°59.981'	11°49.980'	-19.9997	11.833	408.5	10	398.5	0.498526	36.594	30.4575	6.019	5.90114
Traffic M-153	45	2019-03-09	15:45:00	19°59.981'	11°49.980'	-19.9997	11.833	408.5	20	388.5	0.553684	30.1035	23.553	4.598	5.9737
Traffic M-153	45	2019-03-09	15:45:00	19°59.981'	11°49.980'	-19.9997	11.833	408.5	30	378.5	0.578947	29.24	26.54	4.815	6.42792
Traffic M-153	45	2019-03-09	15:45:00	19°59.981'	11°49.980'	-19.9997	11.833	408.5	50	358.5	0.590105	40.474	40.261	7.2305	6.49355
Traffic M-153	45	2019-03-09	15:45:00	19°59.981'	11°49.980'	-19.9997	11.833	408.5	75	333.5	0.416842	16.067	13.627	2.704	5.87705
Traffic M-153	45	2019-03-09	15:45:00	19°59.981'	11°49.980'	-19.9997	11.833	408.5	100	308.5	0.432737	9.828	9.4065	1.624	6.75473
Traffic M-153	45	2019-03-09	15:45:00	19°59.981'	11°49.980'	-19.9997	11.833	408.5	125	283.5	0.735556	5.173	5.1715	0.7945	7.59082
Traffic M-153	45	2019-03-09	15:45:00	19°59.981'	11°49.980'	-19.9997	11.833	408.5	150	258.5	0.314737	10.884	10.0965	1.564	7.52835
Traffic M-153	45	2019-03-09	15:45:00	19°59.981'	11°49.980'	-19.9997	11.833	408.5	300	108.5	0.397895	11.3415	7.997	1.408	6.62354
Traffic M-153	46	2019-03-10	00:15:00	20°00.019'	11°24.896'	-20.0003	11.4149	864	0	864	0.944833	38.833	38.802	5.7455	7.87576
Traffic M-153	46	2019-03-10	00:15:00	20°00.019'	11°24.896'	-20.0003	11.4149	864	10	854	0.763333	43.4345	43.228	6.9715	7.23111
Traffic M-153	46	2019-03-10	00:15:00	20°00.019'	11°24.896'	-20.0003	11.4149	864	150	714	0.191429	15.56	12.9995	1.8335	8.26821
Traffic M-153	46	2019-03-10	00:15:00	20°00.019'	11°24.896'	-20.0003	11.4149	864	300	564	0.190842	13.3785	12.8855	1.6325	9.20479
Traffic M-153	46	2019-03-10	00:15:00	20°00.019'	11°24.896'	-20.0003	11.4149	864	500	364	0.175172	17.0345	12.518	1.588	9.19286
Traffic M-153	48	2019-03-10	18:00:00	21°39.999'	12°25.000'	-21.6667	12.4167	946	0	946	0.517	45.064	37.8425	6.679	6.60746
Traffic M-153	48	2019-03-10	19:00:00	21°39.999'	12°25.000'	-21.6667	12.4167	946	10	936	0.775556	24.561	23.793	4.0025	6.9324
Traffic M-153	48	2019-03-10	19:00:00	21°39.999'	12°25.000'	-21.6667	12.4167	946	20	926	0.52125	37.173	34.157	6.1745	6.45125
Traffic M-153	48	2019-03-10	18:00:00	21°39.999'	12°25.000'	-21.6667	12.4167	946	150	796	0.203103	19.993	16.798	3.022	6.4823
Traffic M-153	48	2019-03-10	18:00:00	21°39.999'	12°25.000'	-21.6667	12.4167	946	300	646	0.154483	22.317	18.551	2.8775	7.51827
Traffic M-153	48	2019-03-10	18:00:00	21°39.999'	12°25.000'	-21.6667	12.4167	946	500	446	0.156526	14.9495	12.2485	2.1535	6.63291
Traffic M-153	49	2019-03-10	21:10:00	21°39.992'	12°35.029'	-21.6667	12.5838	582	0	582	0.609	40.236	37.293	6.778	6.4164
Traffic M-153	49	2019-03-10	21:10:00	21°39.992'	12°35.029'	-21.6667	12.5838	582	10	572	0.667	33.4225	31.8485	5.603	6.62879
Traffic M-153	49	2019-03-10	21:10:00	21°39.992'	12°35.029'	-21.6667	12.5838	582	150	432	0.158246	20.1585	17.7655	2.6925	7.69463
Traffic M-153	49	2019-03-10	21:10:00	21°39.992'	12°35.029'	-21.6667	12.5838	582	300	282	0.201132	17.522	14.08	2.172	7.55977
Traffic M-153	49	2019-03-10	21:10:00	21°39.992'	12°35.029'	-21.6667	12.5838	582	500	82	0.238276	16.3985	13.654	1.715	9.28457
Traffic M-153	50	2019-03-11	05:30:00	21°40.018'	13°11.000'	-21.667	13.1833	168.6	0	168.6	0.633	43.207	40.696	6.865	6.91317
Traffic M-153	50	2019-03-11	05:30:00	21°40.018'	13°11.000'	-21.667	13.1833	168.6	10	158.6	0.898	29.3125	27.695	4.572	7.06417
Traffic M-153	50	2019-03-11	05:30:00	21°40.018'	13°11.000'	-21.667	13.1833	168.6	20	148.6	0.6692	39.606	38.0035	6.458	6.86264
Traffic M-153	50	2019-03-11	05:30:00	21°40.018'	13°11.000'	-21.667	13.1833	168.6	30	138.6	0.916	27.873	27.792	4.36	7.4336
Traffic M-153	50	2019-03-11	05:30:00	21°40.018'	13°11.000'	-21.667	13.1833	168.6	50	118.6	0.508235	17.1395	16.304	2.3075	8.23983
Traffic M-153	50	2019-03-11	05:30:00	21°40.018'	13°11.000'	-21.667	13.1833	168.6	75	93.6	0.517895	9.945	8.6315	1.5435	6.52147
Traffic M-153	50	2019-03-11	05:30:00	21°40.018'	13°11.000'	-21.667	13.1833	168.6	100	68.6	0.491579	19.201	17.721	3.659	5.64796
Traffic M-153	50	2019-03-11	05:30:00	21°40.018'	13°11.000'	-21.667	13.1833	168.6	125	43.6	0.518316	11.7035	9.956	1.6765	6.92544
Traffic M-153	50	2019-03-11	05:30:00	21°40.018'	13°11.000'	-21.667	13.1833	168.6	150	18.6	0.720421	12.507	9.8355	1.409	8.14051
Traffic M-153	52	2019-03-11	17:15:00	22°09.997'	12°44.971'	-22.1666	12.7495	443	0	443	0.8105	33.3135	29.919	4.9675	7.02385
Traffic M-153	52	2019-03-11	17:15:00	22°09.997'	12°44.971'	-22.1666	12.7495	443	10	433	0.831429	26.4675	20.716	4.1615	5.80526
Traffic M-153	52	2019-03-11	17:15:00	22°09.997'	12°44.971'	-22.1666	12.7495	443	20	423	0.811579	27.1805	25.3202	4.4565	6.62581
Traffic M-153	52	2019-03-11	17:15:00	22°09.997'	12°44.971'	-22.1666	12.7495	443	30	413	0.5431	19.3525	19.2488	3.4175	6.56843
Traffic M-153	52	2019-03-11	17:15:00	22°09.997'	12°44.971'	-22.1666	12.7495	443	50	393	0.586632	7.1275	6.24809	0.9925	7.34147
Traffic M-153	52	2019-03-11	17:15:00	22°09.997'	12°44.971'	-22.1666	12.7495	443	75	368	0.471789	8.826	6.82847	1.2045	6.61124
Traffic M-153	52	2019-03-11	17:15:00	22°09.997'	12°44.971'	-22.1666	12.7495	443	100	343	0.629895	6.2255	5.51371	0.885	7.26552
Traffic M-153	52	2019-03-11	17:15:00	22°09.997'	12°44.971'	-22.1666	12.7495	443	125	318	0.431579	9.826	8.60322	1.2445	8.0618
Traffic M-153	52	2019-03-11	17:15:00	22°09.997'	12°44.971'	-22.1666	12.7495	443	150	293	0.339231	13.1195	12.3699	1.5045	9.58824
Traffic M-153	52	2019-03-11	17:15:00	22°09.997'	12°44.971'	-22.1666	12.7495	443	300	143	0.470842	11.8864	9.70672	1.20515	9.39285
Traffic M-153	53	2019-03-12	01:30:00	22°09.963'	13°23.288'	-22.166	13.3881	187.2	0	187.2	0.753333	34.9255	31.7155	6.626	5.58195
Traffic M-153	53	2019-03-12	01:30:00	22°09.963'	13°23.288'	-22.166	13.3881	187.2	10	177.2	0.802857	32.8595	32.069	6.246	5.98755
Traffic M-153	53	2019-03-12	01:30:00	22°09.963'	13°23.288'	-22.166	13.3881	187.2	20	167.2	0.558737	43.594	32.8915	8.4125	4.55958
Traffic M-153	53	2019-03-12	01:30:00	22°09.963'	13°23.288'	-22.166	13.3881	187.2	30	157.2	0.475789	19.7695	13.974	2.709	6.01558
Traffic M-153	53	2019-03-12	01:30:00	22°09.963'	13°23.288'	-22.166	13.3881	187.2	50	137.2	0.430211	13.7895	11.4365	2.1465	6.21338
Traffic M-153	53	2019-03-12	01:30:00	22°09.963'	13°23.288'	-22.166	13.3881	187.2	75	112.2	0.501053	13.391	11.1905	1.6735	7.79812
Traffic M-153	53	2019-03-12	01:30:00	22°09.963'	13°23.288'	-22.166	13.3881	187.2	100	87.2	0.523684	11.557	8.355	1.9975	4.87782
Traffic M-153	53	2019-03-12	01:30:00	22°09.963'	13°23.288'	-22.166	13.3881	187.2	125	62.2	0.471684	11.101	9.25	1.45	7.43943
Traffic M-153	53	2019-03-12	01:30:00	22°09.963'	13°23.288'	-22.166	13.3881	187.2	150	37.2	0.494737	12.865	11.2895	1.6635	7.9144
Traffic M-153	54	2019-03-12	07:50:00	21°39.565'	13°51.348'	-21.6594	13.8558	33.1	0	33.1	1.20733	22.7975	21.101	3.6485	6.74458
Traffic M-153	54	2019-03-12	07:50:00	21°39.565'	13°51.348'	-21.6594	13.8558	33.1	10	23.1	0.144353	15.4885	15.1341	2.51125	7.02801
Traffic M-153	54	2019-03-12	07:50:00	21°39.565'	13°51.348'	-21.6594	13.8558	33.1	20	13.1	1.47833	22.8235	21.8965	3.7745	6.76521
Traffic M-153	54	2019-03-12	07:50:00	21°39.565'	13°51.348'	-21.6594	13.8558	33.1	27	6.1	2.965	15.1895	13.965	2.501	6.51168
Traffic M-153	55	2019-03-12	14:40:00	22°12.457'	14°09.650'	-22.2076	14.1608	52.7	0	52.7	2.778	43.799	39.8605	7.0545	6.58935
Traffic M-153	55	2019-03-12	14:40:00	22°12.457'	14°09.650'	-22.2076	14.1608	52.7	10	42.7	0.940125	29.748	27.5455	5.1665	6.21756
Traffic M-153	55	2019-03-12	14:40:00	22°12.457'	14°09.650'	-22.2076	14.1608	52.7	20	32.7	0.495895	26.09	25.708	4.586	6.53733
Traffic M-153	55	2019-03-12	14:40:00	22°12.457'	14°09.650'	-22.2076	14.1608	52.7	30	22.7	0.553	22.374	21.51	3.776	6.64316
Traffic M-153	55	2019-03-12	14:40:00	22°12.457'	14°09.650'	-22.2076	14.1608	52.7	47	5.7	0.6375	16.094	15.349	2.772	6.45733
Traffic M-153	56	2019-03-12	19:30:00	22°33.796'	14°20.890'	-22.5633	14.3482	52.1	0	52.1	2.02945	44.846	40.0665	7.9375	5.88659
Traffic M-153	56	2019-03-12	19:30:00	22°33.796'	14°20.890'	-22.5633	14.3482	52.1	10	42.1	0.631579	24.5205	24.193	4.4495	6.34081
Traffic M-153	56	2019-03-12	19:30:00	22°33.796'	14°20.890'	-22.5633	14.3482	52.1	20	32.1	0.731789	19.9165	17.0165	3.226	6.15137
Traffic M-153	56	2019-03-12	19:30:00	22°33.796'	14°20.890'	-22.5633	14.3482	52.1	30	22.1	0.673474	20.074	19.4095	3.033	7.4629
Traffic M-153	56	2019-03-12	19:30:00	22°33.796'	14°20.890'	-22.5633	14.3482	52.1	50	2.1	0.648421	17.241	16.91	2.5935	7.60367
SO-283	20	2021-04-16	12:00:00	30°38.48' S	17°01.02' E	-30.6413	17.017	166	0	166	1.86	37.265	35.107	5.397	7.59222
SO-283	20	2021-04-16	12:00:00	30°38.48' S	17°01.02' E	-30.6413	17.017	166	10	156	1.655	39.939	35.507	6.285	6.59381
SO-283	20	2021-04-16	12:00:00	30°38.48' S	17°01.02' E	-30.6413	17.017	166	30	136	0.480625	27.946	28.579	4.638	7.19191
SO-283	20	2021-04-16	12:00:00	30°38.48' S	17°01.02' E	-30.6413	17.017	166	100	66	0.465	35.001	31.9755	5.903	6.32226
SO-283	20	2021-04-16	12:00:00	30°38.48' S	17°01.02' E	-30.6413	17.017	166	160	6	0.47125	26.946	23.173	4.286	6.31041
SO-283	26	2021-04-18	06:30:00	31°02.20' S	16°58.41' E	-31.0337	16.9735	212.95	0	212.95	1.05333	33.257	28.296	5.781	5.71281
SO-283	26	2021-04-18	06:30:00	31°02.20' S	16°58.41' E	-31.0337	16.9735	212.95	10	202.95	1.33667	32.049	29.412	5.134	6.68646
SO-283	26	2021-04-18	06:30:00	31°02.20' S	16°58.41' E	-31.0337	16.9735	212.95	75	137.95	0.425714	31.261	28.62	4.976	6.713
SO-283	26	2021-04-18	06:30:00	31°02.20' S	16°58.41' E	-31.0337	16.9735	212.95	100	112.95	0.275455	36.322	35.216	5.648	7.27735
SO-283	26	2021-04-18	06:30:00	31°02.20' S	16°58.41' E	-31.0337	16.9735	212.95	210	2.95	0.58	21.994	18.452	2.969	7.25372
SO-283	29	2021-04-20	19:30:00	23°00.00' S	14°12.85' E	-23	14.2147	108	0	108	0.89625	41.1775	37.512	6.7535	6.4829
SO-283	29	2021-04-20	19:30:00	23°00.00' S	14°12.85' E	-23	14.2147	108	30	78	0.432131	29.019	27.32	5.007	6.36841
SO-283	29	2021-04-20	19:30:00	23°00.00' S	14°12.85' E	-23	14.2147	108	50	58	0.5	30.561	27.4985	4.775	6.72146
SO-283	29	2021-04-20	19:30:00	23°00.00' S	14°12.85' E	-23	14.2147	108	70	38	0.4825	40.454	35.136	6.678	6.14092
SO-283	29	2021-04-20	19:30:00	23°00.00' S	14°12.85' E	-23	14.2147	108	100	8	0.551111	37.342	32.279	6.456	5.83558
SO-283	49	2021-04-24	19:00:00	17°15.94' S	11°41.90' E	-17.2657	11.6983	53	5	48	0.793571	22.65	19.801	3.313	6.97579
SO-283	49	2021-04-24	19:00:00	17°15.94' S	11°41.90' E	-17.2657	11.6983	53	45	8	0.380513	32.627	27.692	5.318	6.07762
SO-283	51	2021-04-24	23:00:00	17°15.97' S	11°16.48' E	-17.2662	11.2747	505	25	480	0.437143	28.717	24.258	4.58	6.18183
SO-283	51	2021-04-24	23:00:00	17°15.97' S	11°16.48' E	-17.2662	11.2747	505	318	187	0.272	11.866	10.01	1.609	7.26116
SO-283	51	2021-04-24	23:00:00	17°15.97' S	11°16.48' E	-17.2662	11.2747	505	499	6	0.378889	15.504	12.181	1.863	7.63129
SO-283	55	2021-05-25	12:40:00	18°00.00' S	11°17.99' E	-18	11.2998	906	0	906	0.228636	40.581	36.373	5.88	7.21987
SO-283	55	2021-05-25	12:40:00	18°00.00' S	11°17.99' E	-18	11.2998	906	34	872	0.403125	37.239	32.579	6.35	5.98814
SO-283	55	2021-05-25	12:40:00	18°00.00' S	11°17.99' E	-18	11.2998	906	260	646	0.199344	27.511	24.41	3.358	8.48428
SO-283	55	2021-05-25	12:40:00	18°00.00' S	11°17.99' E	-18	11.2998	906	500	406	0.185714	24.548	18.88	3.188	6.91212
SO-283	55	2021-05-25	12:40:00	18°00.00' S	11°17.99' E	-18	11.2998	906	896	10	0.25125	22.693	17.709	2.528	8.17607
SO-283	57	2021-04-27	05:45:00	25°00.11' S	13°20.01' E	-25.0018	13.3335	1081	5	1076	0.835714	36.559	30.972	6.281	5.7553
SO-283	57	2021-04-27	05:45:00	25°00.11' S	13°20.01' E	-25.0018	13.3335	1081	250	831	0.255385	25.722	23.496	4.341	6.3173
SO-283	57	2021-04-27	05:45:00	25°00.11' S	13°20.01' E	-25.0018	13.3335	1081	500	581	0.23069	30.991	22.665	5.355	4.93997
SO-283	57	2021-04-27	05:45:00	25°00.11' S	13°20.01' E	-25.0018	13.3335	1081	1064	17	0.423265	22.5755	20.828	3.011	8.07355
SO-283	58	2021-04-27	11:30:00	25°00.19' S	13°54.88' E	-25.0032	13.9147	198	0	198	0.875	36.138	29.207	5.986	5.69479
SO-283	58	2021-04-27	11:30:00	25°00.19' S	13°54.88' E	-25.0032	13.9147	198	13	185	0.741	76.747	27.6695	10.73	3.00974
SO-283	58	2021-04-27	11:30:00	25°00.19' S	13°54.88' E	-25.0032	13.9147	198	170	28	0.3445	27.131	24.005	4.111	6.81525
SO-283	59	2021-04-27	13:50:00	24°59.99' S	14°06.11' E	-24.9998	14.1018	170	0	170	0.63	41.661	41.729	6.813	7.1487
SO-283	59	2021-04-27	13:50:00	24°59.99' S	14°06.11' E	-24.9998	14.1018	170	10	160	0.903333	32.371	28.674	5.578	5.99981
SO-283	60	2021-04-27	15:40:00	25°00.01' S	14°19.18' E	-25.0002	14.3197	143	0	143	0.835	38.083	33.732	6.216	6.33372
SO-283	60	2021-04-27	15:40:00	25°00.01' S	14°19.18' E	-25.0002	14.3197	143	10	133	0.833333	40.397	34.894	6.965	5.84733
SO-283	61	2021-04-27	17:50:00	24 59.98 S	14 25.00 E	-24.9997	14.4167	125.4	0	125.4	0.94	29.8125	24.177	5.342	5.28234
SO-283	61	2021-04-27	17:50:00	24 59.98 S	14 25.00 E	-24.9997	14.4167	125.4	15	110.4	0.72625	24.315	22.971	4.332	6.18898
SO-283	66	2021-04-28	02:00:00	25°00.00' S	14°44.64' E	-25	14.741	50	0	50	1.64714	36.087	28.575	5.049	6.60554
SO-283	66	2021-04-28	02:00:00	25°00.00' S	14°44.64' E	-25	14.741	50	13	37	0.995789	34.103	33.469	4.74	8.24123
SO-283	68	2021-04-28	07:50:00	25°00.00' S	14°28.14' E	-25	14.496	115	0	115	1.675	26.071	25.653	4.935	6.06707
SO-283	68	2021-04-28	07:50:00	25°00.00' S	14°28.14' E	-25	14.496	115	40	75	0.527857	32.455	29.772	5.671	6.1274
SO-283	68	2021-04-28	07:50:00	25°00.00' S	14°28.14' E	-25	14.496	115	109	6	0.576842	26.339	22.01	4.176	6.15159
SO-283	71	2021-04-28	13:30:00	24°59.99' S	13°59.99' E	-24.9998	13.9998	172	0	172	0.669667	40.633	32.585	7.145	5.32284
SO-283	71	2021-04-28	13:30:00	24°59.99' S	13°59.99' E	-24.9998	13.9998	172	13	159	0.6325	34.256	30.593	6.041	5.91073
SO-283	72	2021-04-28	15:15:00	24°59.99' S	13°49.99' E	-24.9998	13.8332	222	0	222	0.644	24.4867	19.7415	4.05163	5.68694
SO-283	72	2021-04-28	15:15:00	24°59.99' S	13°49.99' E	-24.9998	13.8332	222	25	197	0.746667	35.6525	33.746	6.45804	6.09887
SO-283	73	2021-04-28	16:30:00	25°00.03' S	13°43.85' E	-25.0005	13.7308	313	0	313	0.963333	29.0722	28.473	4.81656	6.89959
SO-283	73	2021-04-28	16:30:00	25°00.03' S	13°43.85' E	-25.0005	13.7308	313	10	303	0.823333	38.454	34.512	6.49703	6.19987
SO-283	75	2021-04-28	19:30:00	24°59.95' S	13°32.81' E	-24.9992	13.5468	630	0	630	0.845714	59.4439	31.052	9.9512	3.64202
SO-283	75	2021-04-28	19:30:00	24°59.95' S	13°32.81' E	-24.9992	13.5468	630	350	280	0.306316	22.4575	22.611	3.18578	8.28384
SO-283	75	2021-04-28	19:30:00	24°59.95' S	13°32.81' E	-24.9992	13.5468	630	617	13	0.517922	26.1301	18.664	2.85565	7.62829
SO-283	86	2021-05-03	12:00:00	10°43.99' S	13°09.03' E	-10.7332	13.1505	690	0	690	0.307647	37.6986	31.547	5.54728	6.63752
SO-283	86	2021-05-03	12:00:00	10°43.99' S	13°09.03' E	-10.7332	13.1505	690	40	650	0.302564	31.2543	25.277	5.27552	5.59227
SO-283	87	2021-05-03	13:30:00	10°42.00' S	13°12.00' E	-10.7	13.2	430	0	430	0.351176	34.2203	32.05	5.20576	7.18575
SO-283	87	2021-05-03	13:30:00	10°42.00' S	13°12.00' E	-10.7	13.2	430	40	390	0.340513	32.5951	24.418	5.58042	5.10706
SO-283	88	2021-05-03	14:55:00	10°39.99' S	13°15.01' E	-10.6665	13.2501	217	0	217	0.343125	46.6723	31.267	8.12447	4.49178
SO-283	88	2021-05-03	14:55:00	10°39.99' S	13°15.01' E	-10.6665	13.2501	217	34	183	0.456923	39.209	50.706	6.56275	9.01781
SO-283	90	2021-05-03	16:45:00	10°36.06' S	13°20.97' E	-10.601	13.3495	107	0	107	0.30375	39.5354	30.098	6.84854	5.12941
SO-283	90	2021-05-03	16:45:00	10°36.06' S	13°20.97' E	-10.601	13.3495	107	30	77	0.407857	19.1966	18.068	2.72421	7.74101
SO-283	92	2021-05-03	18:25:00	10°32.00' S	13°26.98' E	10.5333	13.4497	58	0	58	0.31625	35.6478	37.422	5.72349	7.63122
SO-283	92	2021-05-03	18:25:00	10°32.00' S	13°26.98' E	10.5333	13.4497	58	20	38	0.302778	33.5117	27.381	5.58961	5.71736
SO-283	93	2021-05-03	19:10:00	10°29.88' S	13°29.99' E	-10.498	13.4998	42.5	0	42.5	0.518333	21.5389	23.096	3.72392	7.23876
SO-283	93	2021-05-03	19:10:00	10°29.88' S	13°29.99' E	-10.498	13.4998	42.5	20	22.5	0.384375	34.75	30.421	6.10719	5.81379
SO-285	19	2021-09-15	05:01:00	31°00,000'S	015°32,9999'E	-31	15.55	636.39	50	586.39	0.32	30.129	24.508	4.549	6.28287
SO-285	19	2021-09-15	05:01:00	31°00,000'S	015°32,9999'E	-31	15.55	636.39	350	286.39	0.246667	20.629	15.46	2.339	7.70806
SO-285	20	2021-09-15	11:55:00	31°59,609'S	015°59,957'E	-31.9993	15.9993	834.72	10	824.72	0.363784	28.039	20.745	4.78	5.06118
SO-285	20	2021-09-15	11:55:00	31°59,609'S	015°59,957'E	-31.9993	15.9993	834.72	50	784.72	0.325405	32.712	22.071	5.489	4.68916
SO-285	20	2021-09-15	11:55:00	31°59,609'S	015°59,957'E	-31.9993	15.9993	834.72	150	684.72	0.276757	17.657	8.66	2.314	4.36436
SO-285	20	2021-09-15	11:55:00	31°59,609'S	015°59,957'E	-31.9993	15.9993	834.72	300	534.72	0.251579	18.26	18.24	1.427	14.9062
SO-285	20	2021-09-15	11:55:00	31°59,609'S	015°59,957'E	-31.9993	15.9993	834.72	500	334.72	0.270103	25.722	13.42	2.634	5.94159
SO-285	26	2021-09-18	23:35:00	31°59,591'S	015°51,012°E	-31.9932	15.8502	1054.96	10	1044.96	0.329189	26.659	24.763	4.402	6.56023
SO-285	26	2021-09-18	23:35:00	31°59,591'S	015°51,012°E	-31.9932	15.8502	1054.96	45	1009.96	0.296216	28.938	24.386	4.845	5.86966
SO-285	26	2021-09-18	23:35:00	31°59,591'S	015°51,012°E	-31.9932	15.8502	1054.96	150	904.96	0.198421	8.831	7.138	1.178	7.06638
SO-285	26	2021-09-18	23:35:00	31°59,591'S	015°51,012°E	-31.9932	15.8502	1054.96	300	754.96	0.186842	10.322	8.333	1.059	9.17638
SO-285	26	2021-09-18	23:35:00	31°59,591'S	015°51,012°E	-31.9932	15.8502	1054.96	500	554.96	0.198919	9.004	8.311	1.017	9.53012
SO-285	27	2021-09-19	05:03:00	31°59,602'S	015°59,989'E	-31.9934	15.9998	823.05	10	813.05	0.405185	21.512	18.823	3.623	6.0588
SO-285	27	2021-09-19	05:03:00	31°59,602'S	015°59,989'E	-31.9934	15.9998	823.05	40	783.05	0.31	26.504	14.422	4.224	3.98169
SO-285	27	2021-09-19	05:03:00	31°59,602'S	015°59,989'E	-31.9934	15.9998	823.05	150	673.05	0.238333	11.737	11.867	1.804	7.67132
SO-285	27	2021-09-19	05:03:00	31°59,602'S	015°59,989'E	-31.9934	15.9998	823.05	300	523.05	0.209189	7.57	7.36	0.803	10.6888
SO-285	27	2021-09-19	05:03:00	31°59,602'S	015°59,989'E	-31.9934	15.9998	823.05	500	323.05	0.226316	9.22	9.13	1.197	8.89493
SO-285	29	2021-09-19	12:45:00	31°59,676'S	016°22,224'E	-31.9946	16.3704	406.28	10	396.28	0.5	17.795	17.95	2.982	7.01977
SO-285	29	2021-09-19	12:45:00	31°59,676'S	016°22,224'E	-31.9946	16.3704	406.28	40	366.28	0.343125	27.38	27.15	4.633	6.83398
SO-285	29	2021-09-19	12:45:00	31°59,676'S	016°22,224'E	-31.9946	16.3704	406.28	100	306.28	0.26875	10.19	10.15	1.296	9.13328
SO-285	29	2021-09-19	12:45:00	31°59,676'S	016°22,224'E	-31.9946	16.3704	406.28	200	206.28	0.226111	6.83	6.84	1.018	7.83564
SO-285	29	2021-09-19	12:45:00	31°59,676'S	016°22,224'E	-31.9946	16.3704	406.28	300	106.28	0.216111	10.75	10.74	1.306	9.59019
SO-285	32	2021-09-19	23:40:00	31°59,400'S	16°49,200'E	-31.99	16.82	296	10	286	0.887	38.177	35.299	6.177	6.66424
SO-285	32	2021-09-19	23:40:00	31°59,400'S	16°49,200'E	-31.99	16.82	296	100	196	0.317576	25.5	25.3	3.579	8.24375
SO-285	32	2021-09-19	23:40:00	31°59,400'S	16°49,200'E	-31.99	16.82	296	200	96	0.278333	16.488	16.539	2.322	8.3064
SO-285	36	2021-09-20	06:15:00	31°59,602'S	017°25,215'E	-31.9934	17.4203	154.03	10	144.03	0.737391	37.31	36.279	6.764	6.25486
SO-285	36	2021-09-20	06:15:00	31°59,602'S	017°25,215'E	-31.9934	17.4203	154.03	50	104.03	0.365143	24.66	23.309	4.181	6.50144
SO-285	36	2021-09-20	06:15:00	31°59,602'S	017°25,215'E	-31.9934	17.4203	154.03	100	54.03	0.228629	14.827	11.325	2.015	6.55434
SO-285	38	2021-09-20	11:24:00	31°59,451'S	017°47,479'E	-31.9908	17.7913	142.62	10	132.62	0.943	31.309	30.356	5.618	6.30128
SO-285	38	2021-09-20	11:24:00	31°59,451'S	017°47,479'E	-31.9908	17.7913	142.62	20	122.62	1.151	41.71	41.61	4.398	11.0334
SO-285	38	2021-09-20	11:24:00	31°59,451'S	017°47,479'E	-31.9908	17.7913	142.62	50	92.62	0.252821	29.457	27.003	4.785	6.58106
SO-285	38	2021-09-20	11:24:00	31°59,451'S	017°47,479'E	-31.9908	17.7913	142.62	100	42.62	0.575714	16.566	13.101	2.177	7.01798
SO-285	41	2021-09-20	17:00:00	31°59,577'S	018°14,579'E	-31.993	18.243	53	10	43	1.752	30.759	26.034	5.835	5.20315
SO-285	41	2021-09-20	17:00:00	31°59,577'S	018°14,579'E	-31.993	18.243	53	20	33	1.744	18.553	16.791	3.649	5.36622
SO-285	41	2021-09-20	17:00:00	31°59,577'S	018°14,579'E	-31.993	18.243	53	30	23	1.23652	13.94	11.67	2.477	5.49428
SO-285	45	2021-09-21	13:25:00	30°59,890' S	17°20,958'E	-30.9982	17.3493	153	10	143	1.3075	32.298	26.017	5.971	5.08131
SO-285	45	2021-09-21	13:25:00	30°59,890' S	17°20,958'E	-30.9982	17.3493	153	20	133	0.815714	28.371	26.371	5.513	5.57833
SO-285	45	2021-09-21	13:25:00	30°59,890' S	17°20,958'E	-30.9982	17.3493	153	50	103	0.294211	19.524	18.891	3.31	6.65569
SO-285	45	2021-09-21	13:25:00	30°59,890' S	17°20,958'E	-30.9982	17.3493	153	100	53	0.318947	19.947	17.972	3.195	6.55981
SO-285	46	2021-09-21	17:46:00	30°59,991'S	17°37,441'E	-30.9998	17.624	65	10	55	0.8575	24.685	23.949	4.69	5.95498
SO-285	46	2021-09-21	17:46:00	30°59,991'S	17°37,441'E	-30.9998	17.624	65	20	45	0.637143	17.008	15.415	3.139	5.72688
SO-285	46	2021-09-21	17:46:00	30°59,991'S	17°37,441'E	-30.9998	17.624	65	50	15	0.61875	16.457	16.671	2.695	7.21388
SO-285	48	2021-09-21	21:21:00	30°59,959'S	17°20,938'E	-30.9993	17.349	152	10	142	0.749167	30.153	26.649	5.66	5.49073
SO-285	48	2021-09-21	21:21:00	30°59,959'S	17°20,938'E	-30.9993	17.349	152	20	132	0.74	29.177	22.247	5.267	4.92577
SO-285	48	2021-09-21	21:21:00	30°59,959'S	17°20,938'E	-30.9993	17.349	152	50	102	0.408667	25.857	21.91	4.064	6.28716
SO-285	48	2021-09-21	21:21:00	30°59,959'S	17°20,938'E	-30.9993	17.349	152	100	52	0.32125	14.441	13.307	2.28	6.8063
SO-285	53	2021-09-22	11:56:00	30°59,958'S	016°45,066'E	-30.9993	16.7511	238	10	228	0.555714	32.654	26.421	5.428	5.67643
SO-285	53	2021-09-22	11:56:00	30°59,958'S	016°45,066'E	-30.9993	16.7511	238	30	208	0.381111	30.398	28.438	4.795	6.91634
SO-285	53	2021-09-22	11:56:00	30°59,958'S	016°45,066'E	-30.9993	16.7511	238	100	138	0.376667	7.569	6.231	1.207	6.02028
SO-285	53	2021-09-22	11:56:00	30°59,958'S	016°45,066'E	-30.9993	16.7511	238	200	38	0.212778	8.895	6.196	1.505	4.8011
SO-285	58	2021-09-23	00:55:00	30°59,941'S	16°0,042'E	-30.999	16.0007	318	10	308	0.399375	29.057	25.261	5.237	5.62515
SO-285	58	2021-09-23	00:55:00	30°59,941'S	16°0,042'E	-30.999	16.0007	318	30	288	0.433125	28.819	27.566	5.244	6.13023
SO-285	58	2021-09-23	00:55:00	30°59,941'S	16°0,042'E	-30.999	16.0007	318	100	218	0.317059	17.945	15.351	2.324	7.70312
SO-285	58	2021-09-23	00:55:00	30°59,941'S	16°0,042'E	-30.999	16.0007	318	200	118	0.29	19.213	18.395	3.305	6.49074
SO-285	58	2021-09-23	00:55:00	30°59,941'S	16°0,042'E	-30.999	16.0007	318	300	18	0.385143	20.43	20.13	2.724	8.61792
SO-285	68	2021-09-24	05:50:00	30°21,000'S	014°44,995'E	-30.35	14.7499	774.5	10	764.5	0.462857	23.528	22.214	3.969	6.52697
SO-285	68	2021-09-24	05:50:00	30°21,000'S	014°44,995'E	-30.35	14.7499	774.5	20	754.5	0.356216	27.743	21.676	4.865	5.19592
SO-285	68	2021-09-24	05:50:00	30°21,000'S	014°44,995'E	-30.35	14.7499	774.5	150	624.5	0.188947	11.85	11.75	1.737	7.88867
SO-285	68	2021-09-24	05:50:00	30°21,000'S	014°44,995'E	-30.35	14.7499	774.5	300	474.5	0.217297	7.511	7.207	1.187	7.0806
SO-285	68	2021-09-24	05:50:00	30°21,000'S	014°44,995'E	-30.35	14.7499	774.5	500	274.5	0.204444	9.513	7.075	1.303	6.3321
										0
SO-285	71	2021-09-25	05:25:00	30°01,124'S	014°32,361'E	-30.0187	14.5394	649.11	10	639.11	0.297895	25.61	25.51	4.653	6.39357
SO-285	71	2021-09-25	05:25:00	30°01,124'S	014°32,361'E	-30.0187	14.5394	649.11	20	629.11	0.269444	26.598	26.59	4.666	6.64568
SO-285	71	2021-09-25	05:25:00	30°01,124'S	014°32,361'E	-30.0187	14.5394	649.11	150	499.11	0.246111	12.035	8.143	1.729	5.49231
SO-285	71	2021-09-25	05:25:00	30°01,124'S	014°32,361'E	-30.0187	14.5394	649.11	300	349.11	0.195263	8.645	8.289	1.307	7.39593
SO-285	71	2021-09-25	05:25:00	30°01,124'S	014°32,361'E	-30.0187	14.5394	649.11	500	149.11	0.250526	10.876	10.844	1.373	9.21054
SO-285	77	2021-09-26	11:04:00	29°59,985'S	015°07,789'E	-29.9997	15.1298	241.8	10	231.8	0.494167	22.507	20.5509	3.921	6.11224
SO-285	77	2021-09-26	11:04:00	29°59,985'S	015°07,789'E	-29.9997	15.1298	241.8	20	221.8	0.302222	20.857	14.5376	3.688	4.59694
SO-285	77	2021-09-26	11:04:00	29°59,985'S	015°07,789'E	-29.9997	15.1298	241.8	100	141.8	0.262941	18.106	14.1545	2.928	5.63752
SO-285	77	2021-09-26	11:04:00	29°59,985'S	015°07,789'E	-29.9997	15.1298	241.8	200	41.8	0.281765	9.832	5.83929	1.496	4.55192
SO-285	77	2021-09-26	11:04:00	29°59,985'S	015°07,789'E	-29.9997	15.1298	241.8	50	191.8	0.297059	10.236	7.28201	1.474	5.76129
SO-285	80	2021-09-26	15:12:00	29°59,993'S	015°45,011'E	-29.9999	15.7502	203.21	10	193.21	0.633	23.03	23.04	3.76	7.14596
SO-285	80	2021-09-26	15:12:00	29°59,993'S	015°45,011'E	-29.9999	15.7502	203.21	50	153.21	0.4	24.65	17.1826	4.636	4.32227
SO-285	80	2021-09-26	15:12:00	29°59,993'S	015°45,011'E	-29.9999	15.7502	203.21	100	103.21	0.304743	10.473	8.47939	1.687	5.86159
SO-285	80	2021-09-26	15:12:00	29°59,993'S	015°45,011'E	-29.9999	15.7502	203.21	150	53.21	0.281081	15.044	8.63382	2.038	4.94043
SO-285	82	2021-09-26	21:25:00	29°59,957'S	16°3,013'E	-29.9999	16.0502	188	10	178	0.721	37.7892	33.9058	7.17437	5.51133
SO-285	82	2021-09-26	21:25:00	29°59,957'S	16°3,013'E	-29.9999	16.0502	188	50	138	0.390857	27.5374	25.3463	5.44431	5.42921
SO-285	82	2021-09-26	21:25:00	29°59,957'S	16°3,013'E	-29.9999	16.0502	188	100	88	0.459394	13.5186	12.6081	2.65053	5.54733
SO-285	82	2021-09-26	21:25:00	29°59,957'S	16°3,013'E	-29.9999	16.0502	188	175	13	0.493333	20.3164	15.8093	3.53127	5.22092
SO-285	85	2021-09-27	03:43:00	29°59,995'S	16°30,004'E	-29.9999	16.5001	174	10	164	0.8825	39.4506	35.4033	7.70485	5.35853
SO-285	85	2021-09-27	03:43:00	29°59,995'S	16°30,004'E	-29.9999	16.5001	174	50	124	0.272432	17.3507	15.3	3.03684	5.87539
SO-285	85	2021-09-27	03:43:00	29°59,995'S	16°30,004'E	-29.9999	16.5001	174	100	74	0.316667	23.9567	15.1974	4.12644	4.29497
SO-285	85	2021-09-27	03:43:00	29°59,995'S	16°30,004'E	-29.9999	16.5001	174	150	24	0.448125	19.0314	13.5739	2.94627	5.37275
SO-285	88	2021-09-27	08:45:00	29°59,987'S	017°00,000'E	-29.9998	17	122.5	10	112.5	0.798889	35.8497	31.5238	7.02003	5.23679
SO-285	88	2021-09-27	08:45:00	29°59,987'S	017°00,000'E	-29.9998	17	122.5	15	107.5	0.731111	30.6518	29.5894	5.95169	5.79778
SO-285	88	2021-09-27	08:45:00	29°59,987'S	017°00,000'E	-29.9998	17	122.5	50	72.5	0.327429	22.59	22.58	3.73644	7.04745
SO-285	88	2021-09-27	08:45:00	29°59,987'S	017°00,000'E	-29.9998	17	122.5	100	22.5	1.103	10.3326	9.6709	1.49994	7.519
SO-285	89	2021-09-27	13:20:00	29°44,950'S	016°52,051'E	-29.7492	16.8675	126.6	10	116.6	0.719625	27.7843	24.6513	5.38886	5.33469
SO-285	89	2021-09-27	13:20:00	29°44,950'S	016°52,051'E	-29.7492	16.8675	126.6	20	106.6	0.34	27.66	27.69	4.80294	6.72329
SO-285	89	2021-09-27	13:20:00	29°44,950'S	016°52,051'E	-29.7492	16.8675	126.6	50	76.6	0.283333	26.446	22.0757	5.08389	5.0639
SO-285	89	2021-09-27	13:20:00	29°44,950'S	016°52,051'E	-29.7492	16.8675	126.6	100	26.6	0.874545	14.3952	12.4019	2.08124	6.94915
SO-285	90	2021-09-27	15:51:00	29°30,377'S	016°44,823'E	-29.5063	16.7471	122.39	10	112.39	1.32714	29.936	30.088	5.278	6.64798
SO-285	90	2021-09-27	15:51:00	29°30,377'S	016°44,823'E	-29.5063	16.7471	122.39	20	102.39	0.797182	27.47	27.47	4.897	6.54176
SO-285	90	2021-09-27	15:51:00	29°30,377'S	016°44,823'E	-29.5063	16.7471	122.39	50	72.39	0.422743	18.984	18.079	3.141	6.71232
SO-285	90	2021-09-27	15:51:00	29°30,377'S	016°44,823'E	-29.5063	16.7471	122.39	100	22.39	1.02667	9.222	8.068	1.277	7.36785
SO-285	91	2021-09-27	17:34:00	29°14,993'S	016°37,001'E	-29.2499	16.6167	123.53	10	113.53	1.895	33.177	31.211	5.964	6.1029
SO-285	91	2021-09-27	17:34:00	29°14,993'S	016°37,001'E	-29.2499	16.6167	123.53	20	103.53	0.746167	29.229	27.998	5.435	6.0075
SO-285	91	2021-09-27	17:34:00	29°14,993'S	016°37,001'E	-29.2499	16.6167	123.53	50	73.53	0.429375	22.214	17.366	3.842	5.27119
SO-285	91	2021-09-27	17:34:00	29°14,993'S	016°37,001'E	-29.2499	16.6167	123.53	100	23.53	1.42125	9.042	7.421	1.345	6.43437
SO-285	92	2021-09-27	19:43:00	28°59,998'S	016°29,884'E	-29	16.4981	121.43	10	111.43	2.229	26.67	25.288	4.982	5.91939
SO-285	92	2021-09-27	19:43:00	28°59,998'S	016°29,884'E	-29	16.4981	121.43	20	101.43	1.5925	31.544	29.12	5.927	5.72957
SO-285	92	2021-09-27	19:43:00	28°59,998'S	016°29,884'E	-29	16.4981	121.43	50	71.43	0.423222	18.622	15.767	3.037	6.05439
SO-285	92	2021-09-27	19:43:00	28°59,998'S	016°29,884'E	-29	16.4981	121.43	100	21.43	0.533643	16.646	11.574	2.278	5.9251
SO-285	93	2021-09-27	22:15:00	28°49,572'S	16°30,327'E	-28.8262	16.5055	53	10	43	1.585	30.702	29.117	5.961	5.69631
SO-285	93	2021-09-27	22:15:00	28°49,572'S	16°30,327'E	-28.8262	16.5055	53	20	33	0.580125	20.342	15.782	3.774	4.8767
SO-285	93	2021-09-27	22:15:00	28°49,572'S	16°30,327'E	-28.8262	16.5055	53	40	13	2.8005	6.324	4.295	1.047	4.7839
SO-285	96	2021-09-28	03:11:00	29°03,085'S	16°03,494'E	-29.0514	16.0582	162.7	10	152.7	0.768	27.36	27.26	5.31	5.98684
SO-285	96	2021-09-28	03:11:00	29°03,085'S	16°03,494'E	-29.0514	16.0582	162.7	30	132.7	0.570417	30.39	30.49	5.54861	6.40824
SO-285	96	2021-09-28	03:11:00	29°03,085'S	16°03,494'E	-29.0514	16.0582	162.7	100	62.7	0.396118	18.6356	16.298	3.04786	6.23599
SO-285	96	2021-09-28	03:11:00	29°03,085'S	16°03,494'E	-29.0514	16.0582	162.7	150	12.7	0.396667	21.6032	18.93	3.14874	7.01099
SO-285	100	2021-09-28	10:47:00	29°31,946'S	015°18,434'E	-29.5324	15.3072	166.55	10	156.55	0.8435	33.1327	27.746	5.47392	5.91109
SO-285	100	2021-09-28	10:47:00	29°31,946'S	015°18,434'E	-29.5324	15.3072	166.55	30	136.55	0.298974	27.62	27.63	4.52813	7.11586
SO-285	100	2021-09-28	10:47:00	29°31,946'S	015°18,434'E	-29.5324	15.3072	166.55	100	66.55	0.266286	14.0775	8.53	2.25922	4.40308
SO-285	100	2021-09-28	10:47:00	29°31,946'S	015°18,434'E	-29.5324	15.3072	166.55	150	16.55	0.316842	15.5632	12.563	1.99828	7.33168
SO-285	101	2021-09-30	16:41:00	22°59,985'S	014°15,006'E	-22.9997	14.2501	98.23	10	88.23	1.9755	28.1578	37.422	5.56025	7.84871
SO-285	101	2021-09-30	16:41:00	22°59,985'S	014°15,006'E	-22.9997	14.2501	98.23	20	78.23	0.5231	25.3995	17.162	4.70177	4.25669
SO-285	101	2021-09-30	16:41:00	22°59,985'S	014°15,006'E	-22.9997	14.2501	98.23	50	48.23	0.318714	20.5788	24.355	3.29619	8.61672
SO-285	101	2021-09-30	16:41:00	22°59,985'S	014°15,006'E	-22.9997	14.2501	98.23	89	9.23	1.25375	11.9869	44.086	1.7936	28.6643
SO-285	102	2021-09-30	17:59:00	22°59,998'S	014°05,744'E	-23	14.0957	131.38	10	121.38	0.74375	33.55	33.59	5.87358	6.66919
SO-285	102	2021-09-30	17:59:00	22°59,998'S	014°05,744'E	-23	14.0957	131.38	20	111.38	0.5779	36.236	34.786	6.53029	6.21209
SO-285	102	2021-09-30	17:59:00	22°59,998'S	014°05,744'E	-23	14.0957	131.38	50	81.38	0.205813	28.3565	25.766	5.02479	5.97991
SO-285	102	2021-09-30	17:59:00	22°59,998'S	014°05,744'E	-23	14.0957	131.38	100	31.38	0.302703	24.755	21.283	4.15176	5.97815
SO-285	104	2021-09-30	22:32:00	22°59,966'S	13°44,992'E	-22.9994	13.7499	144	10	134	0.427333	34.8995	32.173	6.84749	5.47931
SO-285	104	2021-09-30	22:32:00	22°59,966'S	13°44,992'E	-22.9994	13.7499	144	20	124	0.482	33.9643	28.801	6.04721	5.55416
SO-285	104	2021-09-30	22:32:00	22°59,966'S	13°44,992'E	-22.9994	13.7499	144	50	94	0.349231	34.0302	24.602	4.85213	5.91295
SO-285	104	2021-09-30	22:32:00	22°59,966'S	13°44,992'E	-22.9994	13.7499	144	100	44	0.355167	36.5782	21.865	6.55745	3.88848
SO-285	105	2021-10-01	02:00:00	22°59,920'S	13°33,041'E	-22.9987	13.5507	160	10	150	0.464929	28.09	28.09	5.177	6.32761
SO-285	105	2021-10-01	02:00:00	22°59,920'S	13°33,041'E	-22.9987	13.5507	160	20	140	0.428071	23.309	23.621	4.285	6.42856
SO-285	105	2021-10-01	02:00:00	22°59,920'S	13°33,041'E	-22.9987	13.5507	160	50	110	0.381667	18.597	17.874	3.368	6.18893
SO-285	105	2021-10-01	02:00:00	22°59,920'S	13°33,041'E	-22.9987	13.5507	160	100	60	0.287784	20.12	20.12	3.418	6.86471
SO-285	108	2021-10-01	05:52:00	22°59,993'S	013°04,836	-22.9999	13.0806	355.12	30	325.12	0.562143	26.127	24.219	5.096	5.54233
SO-285	108	2021-10-01	05:52:00	22°59,993'S	013°04,836	-22.9999	13.0806	355.12	50	305.12	0.316667	18.37	18.33	3.257	6.56312
SO-285	108	2021-10-01	05:52:00	22°59,993'S	013°04,836	-22.9999	13.0806	355.12	100	255.12	0.245543	10.722	10.304	1.704	7.05184
SO-285	108	2021-10-01	05:52:00	22°59,993'S	013°04,836	-22.9999	13.0806	355.12	200	155.12	0.271176	9.684	9.431	1.637	6.71854
SO-285	109	2021-10-01	11:04:00	22°59,931'S	012°44,979'E	-22.9989	12.7497	1018.53	30	988.53	0.413214	24.894	23.75	4.174	6.63555
SO-285	109	2021-10-01	11:04:00	22°59,931'S	012°44,979'E	-22.9989	12.7497	1018.53	50	968.53	0.317949	23.872	20.672	4.32	5.58039
SO-285	109	2021-10-01	11:04:00	22°59,931'S	012°44,979'E	-22.9989	12.7497	1018.53	150	868.53	0.2196	13.506	11.764	2.581	5.31536
SO-285	109	2021-10-01	11:04:00	22°59,931'S	012°44,979'E	-22.9989	12.7497	1018.53	200	818.53	0.272571	13.388	10.341	2.132	5.65642
SO-285	109	2021-10-01	11:04:00	22°59,931'S	012°44,979'E	-22.9989	12.7497	1018.53	500	518.53	0.22485	21.11	21.01	3.003	8.159
SO-285	122	2021-10-04	16:55:00	20°59,994'S	011°59,998'E	-20.9999	12	997.2	10	987.2	0.545833	23.033	20.091	3.786	6.18852
SO-285	122	2021-10-04	16:55:00	20°59,994'S	011°59,998'E	-20.9999	12	997.2	30	967.2	0.484	24.327	18.928	3.942	5.59956
SO-285	122	2021-10-04	16:55:00	20°59,994'S	011°59,998'E	-20.9999	12	997.2	150	847.2	0.244737	16.734	9.627	2.363	4.75109
SO-285	122	2021-10-04	16:55:00	20°59,994'S	011°59,998'E	-20.9999	12	997.2	300	697.2	0.318743	18.296	6.688	2.901	2.68853
SO-285	122	2021-10-04	16:55:00	20°59,994'S	011°59,998'E	-20.9999	12	997.2	500	497.2	0.241941	21.199	11.159	2.817	4.6196
SO-285	124	2021-10-05	05:53:00	21°01,336'S	012°25,309'E	-21.0223	12.4218	509.3	10	499.3	0.449938	27.895	20.935	4.681	5.21555
SO-285	124	2021-10-05	05:53:00	21°01,336'S	012°25,309'E	-21.0223	12.4218	509.3	40	469.3	0.499063	23.41	23.052	4.005	6.71231
SO-285	124	2021-10-05	05:53:00	21°01,336'S	012°25,309'E	-21.0223	12.4218	509.3	150	359.3	0.210256	17.251	11.837	2.986	4.62294
SO-285	124	2021-10-05	05:53:00	21°01,336'S	012°25,309'E	-21.0223	12.4218	509.3	300	209.3	0.23255	17.837	9.651	2.954	3.81002
SO-285	124	2021-10-05	05:53:00	21°01,336'S	012°25,309'E	-21.0223	12.4218	509.3	500	9.3	0.366154	16.488	11	1.731	7.41074
SO-285	126	2021-10-05	11:24:00	21°00,007'S	012°49,992'E	-21.0001	12.8332	300.69	10	290.69	0.482143	30.961	27.442	5.162	6.1996
SO-285	126	2021-10-05	11:24:00	21°00,007'S	012°49,992'E	-21.0001	12.8332	300.69	25	275.69	0.445625	29.626	26.667	5.297	5.87097
SO-285	126	2021-10-05	11:24:00	21°00,007'S	012°49,992'E	-21.0001	12.8332	300.69	100	200.69	0.274778	17.84	17.83	2.781	7.47681
SO-285	126	2021-10-05	11:24:00	21°00,007'S	012°49,992'E	-21.0001	12.8332	300.69	200	100.69	0.234556	14.385	10.622	2.064	6.00154
SO-285	126	2021-10-05	11:24:00	21°00,007'S	012°49,992'E	-21.0001	12.8332	300.69	280	20.69	0.438214	22.236	16.182	2.675	7.05463
SO-285	128	2021-10-05	16:16:00	21°00,019'S	013°12,026'E	-21.0003	13.2004	113.79	10	103.79	1.01429	32.263	30.296	5.757	6.13698
SO-285	128	2021-10-05	16:16:00	21°00,019'S	013°12,026'E	-21.0003	13.2004	113.79	5	108.79	1.16129	34.264	25.929	6.47	4.67356
SO-285	128	2021-10-05	16:16:00	21°00,019'S	013°12,026'E	-21.0003	13.2004	113.79	50	63.79	0.298421	17.515	15.366	2.624	6.82909
SO-285	128	2021-10-05	16:16:00	21°00,019'S	013°12,026'E	-21.0003	13.2004	113.79	100	13.79	0.7325	23.327	19.433	2.672	8.48144
SO-285	128	2021-10-05	16:16:00	21°00,019'S	013°12,026'E	-21.0003	13.2004	113.79	20	93.79	0.544	29.648	27.628	5.26	6.12533
SO-285	130	2021-10-05	19:18:00	20°59,961'S	013°26,980'E	-20.9993	13.4497	61.42	10	51.42	0.676	23.0042	19.58	3.76727	6.0611
SO-285	130	2021-10-05	19:18:00	20°59,961'S	013°26,980'E	-20.9993	13.4497	61.42	25	36.42	1.14013	15.3261	12.758	2.32163	6.40849
SO-285	131	2021-10-06	02:40:00	20°02,992'S	12°57,482'E	-20.0499	12.958	62	10	52	1.6225	15.7436	12.854	2.6383	5.68173
SO-285	131	2021-10-06	02:40:00	20°02,992'S	12°57,482'E	-20.0499	12.958	62	15	47	1.655	15.22	15.23	2.23488	7.94715
SO-285	131	2021-10-06	02:40:00	20°02,992'S	12°57,482'E	-20.0499	12.958	62	30	32	1.066	15.8329	15.21	2.48678	7.13277
SO-285	131	2021-10-06	02:40:00	20°02,992'S	12°57,482'E	-20.0499	12.958	62	50	12	0.653643	24.2081	16.099	2.715	6.91504
SO-285	132	2021-10-06	05:35:00	20°02,995'S	12°48,389'E	-20.0499	12.8065	109.7	10	99.7	0.589	28.15	28.16	5.352	6.13596
SO-285	132	2021-10-06	05:35:00	20°02,995'S	12°48,389'E	-20.0499	12.8065	109.7	30	79.7	0.624	21.852	18.304	3.956	5.3958
SO-285	132	2021-10-06	05:35:00	20°02,995'S	12°48,389'E	-20.0499	12.8065	109.7	50	59.7	0.700889	16.138	15.021	2.71	6.46391
SO-285	132	2021-10-06	05:35:00	20°02,995'S	12°48,389'E	-20.0499	12.8065	109.7	100	9.7	1.065	17.122	15.59	2.456	7.40259
SO-285	134	2021-10-06	08:10:00	20°02,977'S	012°29,959'E	-20.0496	12.4993	153.2	10	143.2	0.432833	28.636	27.46	5.183	6.17853
SO-285	134	2021-10-06	08:10:00	20°02,977'S	012°29,959'E	-20.0496	12.4993	153.2	30	123.2	0.386833	32.1	30.461	6.127	5.79779
SO-285	134	2021-10-06	08:10:00	20°02,977'S	012°29,959'E	-20.0496	12.4993	153.2	50	103.2	0.305	21.294	18.863	3.312	6.64181
SO-285	134	2021-10-06	08:10:00	20°02,977'S	012°29,959'E	-20.0496	12.4993	153.2	100	53.2	0.426438	19.882	18.095	2.83	7.45655
SO-285	134	2021-10-06	08:10:00	20°02,977'S	012°29,959'E	-20.0496	12.4993	153.2	145	8.2	0.599167	21.037	17.367	2.6	7.78964
SO-285	136	2021-10-06	12:51:00	20°02,925'S	012°10,970'E	-20.0487	12.1828	280.4	10	270.4	0.386667	37.536	33.859	6.224	6.34411
SO-285	136	2021-10-06	12:51:00	20°02,925'S	012°10,970'E	-20.0487	12.1828	280.4	25	255.4	0.41875	35.03	35.13	6.082	6.73593
SO-285	136	2021-10-06	12:51:00	20°02,925'S	012°10,970'E	-20.0487	12.1828	280.4	50	230.4	0.312222	30.931	30.939	5.883	6.13301
SO-285	136	2021-10-06	12:51:00	20°02,925'S	012°10,970'E	-20.0487	12.1828	280.4	150	130.4	0.234359	24.044	13.634	3.299	4.81955
SO-285	136	2021-10-06	12:51:00	20°02,925'S	012°10,970'E	-20.0487	12.1828	280.4	270	10.4	0.534286	16.18	14.587	2.031	8.37572
SO-285	138	2021-10-06	17:29:00	20°03,001'S	011°49,808'E	-20.05	11.8301	427.65	10	417.65	0.5875	34.2081	32.815	5.736	6.67159
SO-285	138	2021-10-06	17:29:00	20°03,001'S	011°49,808'E	-20.05	11.8301	427.65	20	407.65	0.725	24.1067	23.239	4.073	6.65379
SO-285	138	2021-10-06	17:29:00	20°03,001'S	011°49,808'E	-20.05	11.8301	427.65	50	377.65	0.268333	32.6604	29.413	5.727	5.98933
SO-285	138	2021-10-06	17:29:00	20°03,001'S	011°49,808'E	-20.05	11.8301	427.65	100	327.65	0.237842	26.79	26.89	4.54	6.90718
SO-285	138	2021-10-06	17:29:00	20°03,001'S	011°49,808'E	-20.05	11.8301	427.65	400	27.65	0.283889	14.8359	10.68	2.04	6.1053
SO-285	139	2021-10-07	01:06:00	20°02,966'S	11°30,017'E	-20.0494	11.5003	779.12	10	769.12	0.786	26.8324	25.549	5.041	5.91049
SO-285	139	2021-10-07	01:06:00	20°02,966'S	11°30,017'E	-20.0494	11.5003	779.12	150	629.12	0.3	29.32	29.45	3.85	8.92053
SO-285	139	2021-10-07	01:06:00	20°02,966'S	11°30,017'E	-20.0494	11.5003	779.12	300	479.12	0.348118	17.0594	15.247	3.001	5.92495
SO-285	139	2021-10-07	01:06:00	20°02,966'S	11°30,017'E	-20.0494	11.5003	779.12	500	279.12	0.284444	18.4	18.41	2.726	7.87579
SO-285	140	2021-10-07	13:29:00	20°42,307'S	012°26,800'E	-20.7051	12.4467	317.54	10	307.54	0.48375	30.87	30.66	4.257	8.39913
SO-285	140	2021-10-07	13:29:00	20°42,307'S	012°26,800'E	-20.7051	12.4467	317.54	40	277.54	0.3555	29.3639	24.391	4.809	5.91481
SO-285	140	2021-10-07	13:29:00	20°42,307'S	012°26,800'E	-20.7051	12.4467	317.54	50	267.54	0.2525	25.1218	23.765	4.067	6.81443
SO-285	140	2021-10-07	13:29:00	20°42,307'S	012°26,800'E	-20.7051	12.4467	317.54	150	167.54	0.258	17.1369	14.241	2.621	6.33635
SO-285	140	2021-10-07	13:29:00	20°42,307'S	012°26,800'E	-20.7051	12.4467	317.54	310	7.54	0.403	29.3305	14.656	4.837	3.5335
SO-285	141	2021-10-07	19:06:00	21°39,938'S	012°25,194'E	-21.6656	12.4199	935.68	10	925.68	0.381429	27.8975	22.667	4.858	5.4413
SO-285	141	2021-10-07	19:06:00	21°39,938'S	012°25,194'E	-21.6656	12.4199	935.68	40	895.68	0.599286	35.5597	22.188	4.222	6.12867
SO-285	141	2021-10-07	19:06:00	21°39,938'S	012°25,194'E	-21.6656	12.4199	935.68	150	785.68	0.259429	18.1413	16.01	2.931	6.37003
SO-285	141	2021-10-07	19:06:00	21°39,938'S	012°25,194'E	-21.6656	12.4199	935.68	300	635.68	0.246857	17.1722	9.411	2.483	4.42003
SO-285	141	2021-10-07	19:06:00	21°39,938'S	012°25,194'E	-21.6656	12.4199	935.68	500	435.68	0.24125	12.2779	10.64	1.582	7.84334
SO-285	142	08.20.2021	05:53:00	21°39,994'S	012°48,005'E	-21.6666	12.8001	315.61	10	305.61	0.682	35.381	28.049	6.427	5.0895
SO-285	142	08.20.2021	05:53:00	21°39,994'S	012°48,005'E	-21.6666	12.8001	315.61	20	295.61	0.6025	35.447	27.014	6.326	4.97996
SO-285	142	08.20.2021	05:53:00	21°39,994'S	012°48,005'E	-21.6666	12.8001	315.61	50	265.61	0.253889	26.41	17.952	4.531	4.62045
SO-285	142	08.20.2021	05:53:00	21°39,994'S	012°48,005'E	-21.6666	12.8001	315.61	150	165.61	0.257778	16.877	11.262	2.621	5.01089
SO-285	142	08.20.2021	05:53:00	21°39,994'S	012°48,005'E	-21.6666	12.8001	315.61	300	15.61	0.372778	19.061	15.582	2.241	8.10863
SO-285	144	2021-10-08	09:06:00	21°39,992'S	013°10,809'E	-21.6665	13.1802	164.63	10	154.63	0.523	36.0798	31.862	6.68234	5.56046
SO-285	144	2021-10-08	09:06:00	21°39,992'S	013°10,809'E	-21.6665	13.1802	164.63	20	144.63	0.412143	34.0134	28.962	6.49123	5.20316
SO-285	144	2021-10-08	09:06:00	21°39,992'S	013°10,809'E	-21.6665	13.1802	164.63	30	134.63	0.297	31.0039	27.341	5.57502	5.71919
SO-285	144	2021-10-08	09:06:00	21°39,992'S	013°10,809'E	-21.6665	13.1802	164.63	50	114.63	0.27	21.6594	20.736	3.82122	6.32832
SO-285	144	2021-10-08	09:06:00	21°39,992'S	013°10,809'E	-21.6665	13.1802	164.63	100	64.63	0.266111	16.1279	15.183	2.50725	7.06198
SO-285	146	08.20.2021	13:44:00	21°39,870'S	013°30,884'E	-21.6645	13.5147	116.77	5	111.77	1.57333	32.5155	31.377	5.66097	6.46378
SO-285	146	08.20.2021	13:44:00	21°39,870'S	013°30,884'E	-21.6645	13.5147	116.77	10	106.77	0.334167	33.8129	29.632	5.98375	5.77502
SO-285	146	08.20.2021	13:44:00	21°39,870'S	013°30,884'E	-21.6645	13.5147	116.77	30	86.77	0.3	28.3434	26.742	4.80419	6.49142
SO-285	146	08.20.2021	13:44:00	21°39,870'S	013°30,884'E	-21.6645	13.5147	116.77	50	66.77	0.2775	21.5601	19.877	3.64383	6.36149
SO-285	146	08.20.2021	13:44:00	21°39,870'S	013°30,884'E	-21.6645	13.5147	116.77	100	16.77	0.88	27.1918	21.722	3.25613	7.77972
SO-285	147	2021-10-08	16:00:00	21°39,944'S	013°40,879'E	-21.6657	13.6813	99.3	5	94.3	3.8875	27.25	27.26	5.10228	6.23057
SO-285	147	2021-10-08	16:00:00	21°39,944'S	013°40,879'E	-21.6657	13.6813	99.3	10	89.3	1.73	44.8321	37.308	8.60255	5.05756
SO-285	147	2021-10-08	16:00:00	21°39,944'S	013°40,879'E	-21.6657	13.6813	99.3	50	49.3	0.612	18.61	18.71	2.84466	7.67026
SO-285	147	2021-10-08	16:00:00	21°39,944'S	013°40,879'E	-21.6657	13.6813	99.3	85	14.3	0.93875	16.281	14.582	2.30243	7.3858
SO-285	148	2021-10-08	16:34:00	21°40,014'S	013°50,985'E	-21.6669	13.8498	41.28	5	36.28	1.96667	17.7789	17.124	2.92604	6.82482
SO-285	148	2021-10-08	16:34:00	21°40,014'S	013°50,985'E	-21.6669	13.8498	41.28	10	31.28	1.64125	16.0259	13.561	2.48622	6.3609
SO-285	148	2021-10-08	16:34:00	21°40,014'S	013°50,985'E	-21.6669	13.8498	41.28	30	11.28	2.05418	16.2099	12.164	2.64623	5.36061
SO-285	149	2021-10-08	22:06:00	22°14,964'S	13°26,638'E	-22.2494	13.444	161	10	151	0.602143	33.3665	26.425	5.97552	5.1571
SO-285	149	2021-10-08	22:06:00	22°14,964'S	13°26,638'E	-22.2494	13.444	161	20	141	0.614375	25.7385	24.01	4.33968	6.45209
SO-285	149	2021-10-08	22:06:00	22°14,964'S	13°26,638'E	-22.2494	13.444	161	50	111	0.361	28.1384	24.773	5.16537	5.59298
SO-285	149	2021-10-08	22:06:00	22°14,964'S	13°26,638'E	-22.2494	13.444	161	100	61	0.3875	27.6774	27.814	4.88374	6.64167
SO-285	149	2021-10-08	22:06:00	22°14,964'S	13°26,638'E	-22.2494	13.444	161	150	11	0.565625	24.4793	17.96	3.24516	6.45411
